# Supplementary material
Source: publisher figshare collection journal article supplement (https://tandf.figshare.com/ndownloader/files/23172653)
Supplement: Supplementary file 1 [file 23172653]

**Supporting Information**

For

Palladium/Nickel-mediated Cross coupling reaction between Phosphorylamides and Alkenes towards Enephosphorylamides

Zijian Zhaoa,b,c*, Qiao Zhua,b, Shiying Chea, Zhenghong Luoa, c* and Yan Liana*

aSchool of Chemistry and Materials Science, Huaihua University, 180 Huaidong Rd Huaihua, Hunan P.R. China，418000.

bCollege of pharmacy, Shaanxi University of Chinese Medicine, Xixian Rd Xianyang, Shaanxi, P. R. China, 712046.

cKey Laboratory of Research and Utilization of Ethnomedicinal Plant Resources of Hunan Province, Huaihua University, Huaidong Rd. 180, 418000 Huaihua, Hunan, P. R. China

zjzhao72@163.com; [2447151770@qq.com](mailto:2447151770@qq.com); arline7419@163.com

Tel/Fax: +86 745 2851014

**General remarks**

All product mixtures were analyzed by thin layer chromatography glass-backed silica TLC plates with a fluorescent indicator from Branch of Qingdao Haiyang Chemical CO. LTD. UV-active compounds were detected with a UV lamp ( = 254 nm). For flash column chromatography, silica gel (200 - 300 mesh) was used as stationary phase and a mixture of petroleum and ethyl acetate was used as eluent. 1H and 13C NMR spectra were recorded on a Varian INOVA-400 in deuterated chloroform at 25 °C with residue solvent peaks as internal standards ( = 7.26 ppm for 1H-NMR and  = 77.16 ppm for 13C-NMR. Chemical shifts  are reported in ppm, and spin-spin coupling constants (*J*) are given in Hz, while multiplicities are abbreviated by s (singlet), d (doublet), t (triplet), q (quartet), m (multiplet)and br.s (broad singlet). Mass spectra were recorded on a ThermoFinnigan MAT95XP microspectrometer and High resolution mass spectra (HRMS) were recorded on Agilent Technologies Accurate Mass Q-TOF 6530 microspectrometer. Melting points were recorded on a national standard melting point apparatus (Model: Taike XT-4) and were uncorrected.

**Data of all compounds**

*(E,Z)-P-Ethoxy-P-phenyl-N-(N, N-dimethylacrylamide) phosphonamide* ***(3ab/3ab’)*:** Gummy liquid. Yield: 76% (107.2 mg). 1H NMR (400 MHz, CDCl3) δ = 10.30 (t, *J* = 13.4 Hz, NH), 7.78 (dd, *J* = 13.3, 7.6 Hz, 2.38H), 7.53 - 7.49 (m, 1.15H), 7.45 - 7.40 (m, 2.31H), 7.03 - 6.95 (m, 1H), 5.73 (d, *J* = 13.0 Hz, 0.16H)*(E)*, 5.20 (d, *J* = 8.6 Hz, 1H), 4.19 - 4.12 (m, 2.33H), 2.99 (s, 3H), 2.94 (s, 3H), 2.92(s, 0.96H) *(E)*, 1.35 (t, *J* = 7.0 Hz, 3.50H) ppm. 13C NMR (100 MHz, CDCl3) δ = 170.0, 142.5 (*JC-P* = 2.2 Hz), 132.4 (*JC-P* = 3.0 Hz), 131.1 (*JC-P* = 10.1 Hz), 130.1 (*JC-P* = 177.5 Hz), 128.7 (*JC-P* = 14.9 Hz), 91.9 (*JC-P* = 8.2 Hz), 61.6 (*JC-P* = 6.1 Hz), 37.4, 35.1, 16.4 (*JC-P* = 6.7 Hz) ppm. 31P NMR (160 MHz, CDCl3) δ = 17.0*(Z)*, 17.5*(E)* ppm. IR (in KBr): ν = 2976, 2936, 2905, 2878, 1650, 1634, 1620, 1462, 1455, 1272, 1219, 1136, 1043, 957, 751, 697, 536 cm-1. MS (EI) m/z (%) = 113.0 (76), 210.0 (100), 238.0 (86), 282.1 (35). HRMS (ESI) (m/z) [M + H+]: Calcd. 283.1206, Found. 283.1214.

*(E,****Z****)-P-Ethoxy-P-phenyl-N-(N, N-diisopropylacrylamide) phosphonamide* ***(3ac/3ac’):*** Gummy liquid. Yield: 62% (104.8 mg). 1H NMR (400 MHz, CDCl3) δ = 10.30 (t, *J* = 13.6 Hz, NH), 7.80 (dd, *J* = 13.5, 7.7 Hz, 2H), 7.51 (t, *J* = 7.3 Hz, 1H), 7.47 – 7.40 (m, 2H), 6.98 - 6.84 (m, 1H), 5.16 (d, *J* = 8.8 Hz, 1H), 4.20 - 4.12 (m, 2H), 3.92 (s, 2H), 1.35 (t, *J* = 7.0 Hz, 3H), 1.31 - 1.17 (m, 12H) ppm. 13C NMR (100 MHz, CDCl3) δ = 169.3, 141.3 (*JC-P* = 2.9 Hz), 132.3 (*JC-P* = 3.0 Hz), 131.3 (*JC-P* = 10.1 Hz), 130.3 (*JC-P* = 177.1 Hz), 128.6 (*JC-P* = 14.8 Hz), 94.9 (*JC-P* = 5.5 Hz), 61.5 (*JC-P* = 5.9 Hz), 46.8, 45.1, 21.7, 20.9, 16.4 (*JC-P* = 6.8 Hz) ppm. 31P NMR (160 MHz, CDCl3) δ = 17.1 ppm. IR (in KBr): ν = 2972, 2935, 2907, 2875, 1652, 1647, 1636, 1541, 1456, 1339, 1211, 1157, 1130, 1042, 961, 799, 750, 695, 669, 519 cm-1. MS (EI) m/z (%) = 100.1 (80), 169.1 (92), 210.0 (100), 238.0 (65), 338.1 (28). HRMS (ESI) (m/z) [M + H+]: Calcd. 339.1832, Found. 339.1835.

*(E,****Z****)-P-Ethoxy-P-phenyl-N-(N, N-diphenylacrylamide) phosphonamide* ***(3ad/3ad’):*** Gummy liquid. Yield: 65% (131.9 mg). 1H NMR (400 MHz, CDCl3) δ = 10.07 (t, *J* = 13.8 Hz, NH), 7.79 (dd, *J* = 13.6, 7.7 Hz, 2H), 7.53 (t, *J* = 7.4 Hz, 1H), 7.47 - 7.42 (m, 2H), 7.36 (t, *J* = 7.5 Hz, 4H), 7.25 (d, *J* = 7.6 Hz, 6H), 7.02 - 6.94 (m, 1H), 4.93 (d, *J* = 8.6 Hz, 1H), 4.21 - 4.12 (m, 2H), 1.36 (t, *J* = 7.0 Hz, 3H) ppm. 13C NMR (100 MHz, CDCl3) δ = 169.7, 143.6 (*JC-P* = 2.9 Hz), 142.6, 132.5 (*JC-P* = 3.1 Hz), 131.2 (*JC-P* = 10.2 Hz), 129.8 (*JC-P* = 177.4 Hz), 129.4, 128.7 (*JC-P* = 14.9 Hz), 127.8, 126.9, 94.3 (*JC-P* = 8.1 Hz), 61.7 (*JC-P* = 5.9 Hz), 16.4 (*JC-P* = 6.8 Hz) ppm. IR (in KBr): ν = 3061, 2984, 2903, 1639, 1599, 1491, 1456, 1296, 1250, 1128, 1026, 961, 876, 799, 781, 754, 694, 676, 634, 519 cm-1. MS (EI) m/z (%) = 141.0 (42), 168.0 (55), 210.0 (100), 237.1 (75), 361.1 (18), 406.1 (2). HRMS (ESI) (m/z) [M + H+]: Calcd. 407.1519, Found. 407.1526.

*(E,****Z****)-P*-Ethoxy-*P-*phenyl-*N*-(*N, N*-di-*p*-tolylacrylamide) phosphonamide **(3ae/3ae’):** Gummy liquid. Yield: 74% (160.6 mg). 1H NMR (400 MHz, CDCl3) δ = 10.13 (t, *J* = 13 8Hz, NH), 7.79 (dd, *J* = 13.6, 7.7 Hz, 2H), 7.52 (t, *J* = 7.2 Hz, 1H), 7.47 - 7.41 (m, 2H), 7.18 - 7.11 (m, 8H), 7.00 - 6.92 (m, 1H), 4.95 (d, *J* = 8.6 Hz, 1H), 4.23 - 4.12 (m, 2H), 2.33 (s, 6H), 1.35 (t, *J* = 7.0 Hz, 3H) ppm. 13C NMR (100 MHz, CDCl3) δ = 169.8, 143.2 (*JC-P* = 2.9 Hz), 140.2, 136.9, 132.5 (*JC-P* = 3.0 Hz), 131.2 (*JC-P* = 10.2 Hz), 130.0, 129.8 (*JC-P* = 177.3 Hz), 128.6 (*JC-P* = 14.9 Hz), 127.5, 94.4 (*JC-P* = 8.0 Hz), 61.7 (*JC-P* = 6.1 Hz), 21.1, 16.4 (*JC-P* = 6.8 Hz) ppm. 31P NMR (160 MHz, CDCl3) δ = 16.8 ppm. IR (in KBr): ν = 3033, 2980, 1653, 1647, 1638, 1541, 1508, 1458, 1339, 1250, 1128, 1036, 961, 814, 768, 750, 697, 669, 550 cm-1. MS (EI) m/z (%) = 141.0 (65), 196.1 (68), 210.0 (90), 265.1 (100), 434.1 (8). HRMS (ESI) (m/z) [M + H+]: Calcd.435.1832, Found. 435.1836.

*(E,****Z****)-P*-Ethoxy-*P-*phenyl-*N*-(*N*-phenyl-*N*-(*p*-tolyl)acrylamide) phosphonamide **(3af/3af’):** Gummy liquid. Yield: 55% (115.5 mg). 1H NMR (400 MHz, CDCl3) δ = 10.08 (t, *J* = 13.8 Hz, 2H), 7.79 (dd, *J* = 13.5, 7.6 Hz, 2H), 7.53 (t, *J* = 7.4 Hz, 1H), 7.48 - 7.42 (m, 2H), 7.35 (t, *J* = 7.5 Hz, 2H), 7.27 - 7.21 (m, 4H), 7.05 (d, *J* = 7.8 Hz, 3H), 7.00 - 6.93 (m, 1H), 4.93 (d, *J* = 8.6 Hz, 1H), 4.21 - 4.12 (m, 2H), 2.32 (s, 3H), 1.36 (t, *J* = 7.0 Hz, 3H) ppm. 13C NMR (100 MHz, CDCl3) δ = 169.7, 143.5 (*JC-P* = 3.0 Hz), 142.7, 142.5, 132.5 (*JC-P* = 3.0 Hz), 131.2 (*JC-P* = 10.2 Hz), 129.8 (*JC-P* = 177.2 Hz), 129.3, 129.2, 128.6 (*JC-P* = 14.9 Hz), 94.4 (*JC-P* = 8.0 Hz), 61.7 (*JC-P* = 6.0 Hz), 21.4, 16.4 (*JC-P* = 6.9 Hz) ppm. 31P NMR (160 MHz, CDCl3) δ = 16.8 ppm. IR (in KBr): ν = 3062, 3030, 2893, 2862, 1647, 1559, 1541, 1508, 1489, 1458, 1339, 1240, 1128, 1030, 778, 748, 692, 550 cm-1. MS (EI) m/z (%) = 141.0 (100), 182.0 (28), 210.0 (76), 251.1 (42). HRMS (ESI) (m/z) [M + H+]: Calcd. 421.1676, Found. 421.1689.

*(E,****Z****)-P*-Ethoxy-*P-*phenyl-*N*-(N,-4-tolyl-*N*-(*tert*-butyl)acrylamide) phosphonamide **(3ag/3ag’):** Gummy liquid. Yield: 73% (113.2 mg). 1H NMR (400 MHz, CDCl3) δ = 9.85 (d, *J* = 13.6 Hz, NH), 7.79 (dd, *J* = 13.5, 7.5 Hz, 2H), 7.52 (t, *J* = 7.2 Hz, 1H), 7.49 – 7.41 (m, 2H), 6.87 - 6.74 (m, 1H), 5.11 (br. s, NH), 4.71 (d, *J* = 8.3 Hz, 1H), 4.22 - 4.12 (m, 2H), 1.35 (s, 12H) ppm. 13C NMR (100 MHz, CDCl3) δ = 169.3, 140.8 (*JC-P* = 2.9 Hz), 132.4 (*JC-P* = 3.0 Hz), 131.3 (*JC-P* = 10.2 Hz), 130.2 (*JC-P* = 177.1 Hz), 128.7 (*JC-P* = 14.8 Hz), 97.1 (*JC-P* = 7.9 Hz), 61.6 (*JC-P* = 5.7 Hz), 51.2, 29.2, 16.4 (*JC-P* = 6.8 Hz) ppm. 31P NMR (160 MHz, CDCl3) δ = 17.0 ppm. IR (in KBr): ν = 2972, 2935, 2908, 2876, 1653, 1541, 1506, 1451, 1362, 1223, 1132, 1042, 746, 669, 548 cm-1. MS (EI) m/z (%) = 72.0 (87), 114.1 (100), 141.0 (49), 238.0 (26), 310.1 (8). HRMS (ESI) (m/z) [M + H+]: Calcd.311.1519, Found. 311.1533.

*(E,****Z****)-P*-Ethoxy-*P-*phenyl-*N*-(*N*-(*p*-tolyl)acrylamide) phosphonamide **(3ah/3ah’):** Yellow solid, m.p.: 174 – 175 oC. Yield: 62% (106.6 mg). 1H NMR (400 MHz, CDCl3) δ = 9.91 (t, *J* = 13.0 Hz, 1H), 7.79 (dd, *J* = 13.6, 7.6 Hz, 2H), 7.54 (t, *J* = 7.3 Hz, 1H), 7.47 - 7.42 (m, 2H), 7.37 - 7.33 (m, 2H), 7.10 (d, *J* = 8.1 Hz, 2H), 7.01 - 6.94 (m, 1H), 4.99 (d, *J* = 8.3 Hz, 1H), 4.22 - 4.14 (m, 2H), 2.30 (s, 3H), 1.37 (t, *J* = 7.1 Hz, 3H) ppm. 13C NMR (100 MHz, CDCl3) δ = 167.9, 142.6 (*JC-P* = 2.0 Hz), 135.4, 132.6 (*JC-P* = 3.0 Hz), 131.2 (*JC-P* = 10.3 Hz), 129.8 (*JC-P* = 177.9 Hz), 129.6, 128.8 (*JC-P* = 14.9 Hz), 120.3, 96.3 (*JC-P* = 8.4 Hz), 61.8 (*JC-P* = 6.1 Hz), 21.0, 16.4 (*JC-P* = 6.8 Hz) ppm. 31P NMR (160 MHz, CDCl3) δ = 16.9 ppm. IR (in KBr): ν = 3032, 2970, 2883, 1651, 1549, 1541, 1506, 1478, 1455, 1349, 1240, 1130, 1038, 780, 747, 679, 550 cm-1. MS (EI) m/z (%) = 107.0 (100), 141.0 (58), 210.0 (65), 238.0 (72), 344.0 (20). HRMS (ESI) (m/z) [M + H+]: Calcd. 345.1363, Found. 345.1372.

*(E,****Z****)-P*-Ethoxy-*P-*phenyl-*N*-(4-acryloylmorpholine) phosphonamide **(3ai/3ai’):** Gummy liquid. Yield: 60% (97.2 mg). 1H NMR (400 MHz, CDCl3) δ = 10.17 (t, *J* = 13.6 Hz, NH), 7.78 (dd, *J* = 13.5, 7.4 Hz, 2.15H), 7.52 (t, *J* = 7.0 Hz, 1.08H), 7.47 - 7.41 (m, 2.15H), 7.10 - 6.97 (m, 1H), 5.69 (d, *J* = 12.9 Hz, 0.08H) *(E)*, 5.17 (d, *J* = 8.6 Hz, 1H), 4.21 - 4.12 (m, 2.16H), 3.66 (s, 4.32H), 3.60 (s, 2.18H), 3.47 (s, 2.16H), 1.36 (t, *J* = 7.1 Hz, 3.24H) ppm. 13C NMR (100 MHz, CDCl3) δ = 168.6, 143.5 (*JC-P* = 2.5 Hz), 132.5 (*JC-P* = 3.0 Hz), 131.2 (*JC-P* = 10.3 Hz), 129.9 (*JC-P* = 177.8 Hz), 128.7 (*JC-P* = 14.9 Hz), 90.9 (*JC-P* = 8.0 Hz), 66.9, 61.7 (*JC-P* = 6.0 Hz), 45.9, 41.4, 16.4 (*JC-P* = 6.7 Hz) ppm. 31P NMR (160 MHz, CDCl3) δ = 16.8 *(Z)*, 17.3 *(E)* ppm. IR (in KBr): ν = 2973, 2903, 2861, 1647, 1541, 1508, 1339, 1188, 1135, 1112, 1038, 752, 698, 669, 652, 550 cm-1. MS (EI) m/z (%) = 141.0 (100), 157.0 (26), 186.0 (19), 210.0 (72), 238.0 (63), 324.0(13). HRMS (ESI) (m/z) [M + H+]: Calcd.325.1312, Found. 325.1320.

*(E,****Z****)-P*-Methoxy-*P-*phenyl-*N*-(*N,N*-diethylacrylamide) phosphonamide **(3ba/3ba’):** Gummy liquid. Yield: 73% (108.0 mg). 1H NMR (400 MHz, CDCl3) δ = 10.38 (t, *J* = 14.8 Hz, NH), 7.78 (dd, *J* = 13.6, 7.5 Hz, 2H), 7.54 - 7.49 (m, 1H), 7.48 - 7.42 (m, 2H), 7.02 - 6.92 (m, 1H), 5.16 (d, *J* = 8.7 Hz, 1H), 3.78 (d, *J* = 11.4 Hz, 3H), 3.36 (q, *J* = 13.8 Hz, 2H), 3.29 (q, *J* = 13.6 Hz, 2H), 1.17 - 1.10 (m, 6H) ppm. 13C NMR (100 MHz, CDCl3) δ = 169.0, 142.2 (*JC-P* = 2.7 Hz), 132.5 (*JC-P* = 3.0 Hz), 131.2 (*JC-P* = 10.3 Hz), 129.6 (*JC-P* = 177.6 Hz), 128.7 (*JC-P* = 14.8 Hz), 92.6 (*JC-P* = 8.2 Hz), 51.8 (*JC-P* = 6.2 Hz), 42.4, 40.4, 14.6, 13.4 ppm. 31P NMR (160 MHz, CDCl3) δ = 18.6 ppm. IR (in KBr): ν = 2978, 2836, 2875, 1638, 1475, 1458, 1437, 1217, 1132, 1043, 939, 783, 752, 701, 550 cm-1. MS (EI) m/z (%) = 141.0(100), 210.0(86), 296.1(35). HRMS (ESI) (m/z) [M + H+]: Calcd. 297.1363, Found. 297.1365.

*(E,****Z****)-P*-Isopropoxy-*P-*phenyl-*N*-(*N,N*-diethylacrylamide) phosphonamide **(3ca/3ca’):** Gummy liquid. Yield: 70% (113.4 mg). 1H NMR (400 MHz, CDCl3) δ = 10.31 (d, *J* = 13.8 Hz, NH), 7.76 (dd, *J* = 13.5, 7.4 Hz, 2.32H), 7.48 (t, *J* = 6.7 Hz, 1.18H), 7.44 - 7.37 (m, 2.33H), 7.37 - 7.29 (m, 0.18H)*(E)*, 6.99 - 6.90 (m, 1H), 5.64 (d, *J* = 13.0 Hz, 0.16H)*(E)*, 5.11 (d, *J* = 8.7 Hz, 1H), 4.82 - 4.69 (m, 1.17H), 3.38 - 3.30 (m, 2.32H), 3.30 - 3.22 (m, 2.32H), 1.36 (d, *J* = 5.9 Hz, 3.96H), 1.31 (d, *J* = 6.1 Hz, 3H), 1.17 - 1.07 (m, 6.96H) ppm. 13C NMR (100 MHz, CDCl3) δ = 168.9, 142.3 (*JC-P* = 2.9 Hz), 132.2 (*JC-P* = 3.0 Hz), 131.1 (*JC-P* = 10.2 Hz), 130.7 (*JC-P* = 177.4 Hz), 128.5 (*JC-P* = 14.9 Hz), 92.2 (*JC-P* = 8.2 Hz), 70.8 (*JC-P* = 6.1 Hz), 42.3, 40.3, 24.2 (*JC-P* = 4.7 Hz), 24.1 (*JC-P* = 4.4 Hz), 14.5, 13.4 ppm. 31P NMR (160 MHz, CDCl3) δ = 16.2 *(E)*, 15.7 *(Z)* ppm. IR (in KBr): ν = 2968, 2935, 2860, 1649, 1633, 1456, 1437, 1250, 1218, 1128, 1036, 1017, 987, 752, 697, 518 cm-1. MS (EI) m/z (%) = 72.0 (53), 141.0 (100), 210.0 (72), 324.1 (18). HRMS (ESI) (m/z) [M + H+]: Calcd. 325.1676, Found. 325.1682.

*(E,****Z****)-P*-Cyclohexyloxy-*P-*phenyl-*N*-(N,N-diethylacrylamide) phosphonamide **(3da/3da’):** Gummy liquid. Yield: 66% (120.1 mg). 1H NMR (400 MHz, CDCl3) δ = 10.29 (t, *J* = 14.4 Hz, NH), 7.79 (dd, *J* = 13.5, 7.5 Hz, 2H), 7.50 (t, *J* = 7.3 Hz, 1H), 7.46 - 7.39 (m, 2H), 7.01 - 6.92 (m, 1H), 5.12 (d, *J* = 8.7 Hz, 1H), 4.55 - 4.43 (m, 1H), 3.36 (q, *J* = 13.2 Hz, 2H), 3.29 (q, *J* = 13.6 Hz, 2H), 2.00 - 1.94 (m, 1H), 1.90 (s, 2H), 1.77 - 1.67 (m, 2H), 1.66 - 1.54 (m, 2H), 1.48 (d, *J* = 5.8 Hz, 1H), 1.31 - 1.22 (m, 2H), 1.18 - 1.09 (m, 6H) ppm. 13C NMR (100 MHz, CDCl3) δ = 169.0, 142.4 (d, *JC-P* = 2.9 Hz), 132.2 (d, *JC-P* = 2.9 Hz), 131.2 (d, *JC-P* = 10.1 Hz), 131.0 (d, *JC-P* = 177.6 Hz), 128.6 (d, *JC-P* = 14.9 Hz), 92.2 (d, *JC-P* = 8.1 Hz), 75.6 (d, *JC-P* = 6.4 Hz), 42.4, 40.3, 33.9 (d, *JC-P* = 4.1 Hz), 33.8 (d, *JC-P* = 3.9 Hz), 25.2, 23.7, 23.66, 14.6, 13.4 ppm. 31P NMR (160 MHz, CDCl3) δ = 15.6 ppm. IR (in KBr): ν = 2973, 2936, 2859, 1645, 1636, 1456, 1437, 1252, 1217, 1128, 1038, 1012, 991, 752, 696, 517 cm-1. MS (EI) m/z (%) = 141.0(40), 158.0(92), 210.0(100), 364.1(12). HRMS (ESI) (m/z)[ C19H29N2O3P + H+]: Calcd. 365.1989, Found. 365.1996.

*(E,****Z****)-P*-(1-Phenylethoxy)-*P-*phenyl-*N*-( *N,N*-diethylacrylamide) phosphonamide **(3ea/3ea’):** Gummy liquid. Yield: 69% (131.2 mg). 1H NMR (400 MHz, CDCl3) δ 10.37 (q, *J* = 15.7 Hz, 1H), 7.72 (dd, *J* = 13.6, 7.7 Hz, 2H), 7.50 (t, *J* = 7.3 Hz, 1H), 7.44 - 7.38 (m, 2H), 7.28 (t, *J* = 8.0 Hz, 2H), 7.21 (t, *J* = 7.1 Hz, 3H), 6.99 - 6.88 (m, 1H), 5.13 (d, *J* = 8.7 Hz, 1H), 4.34 - 4.22 (m, 2H), 3.37 (q, *J* = 13.8 Hz, 2H), 3.29 (q, *J* = 13.8 Hz, 2H), 3.03 (t, *J* = 7.2 Hz, 2H), 1.19 - 1.10 (m, 6H) ppm. 13C NMR (100 MHz, CDCl3) δ = 169.0, 142.2 (d, *JC-P* = 2.7 Hz), 137.2, 132.4 (d, *JC-P* = 3.1 Hz), 131.2 (d, *JC-P* = 10.3 Hz), 129.9 (d, *JC-P* = 177.1 Hz), 129.2, 128.7 (d, *JC-P* = 14.8 Hz), 128.6, 126.8, 92.5 (d, *JC-P* = 8.2 Hz), 65.8 (d, *JC-P* = 6.1 Hz), 42.4, 40.4, 37.0 (d, *JC-P* = 6.8 Hz), 14.6, 13.4 ppm. 31P NMR (160 MHz, CDCl3) δ = 17.2 ppm. IR (in KBr): ν = 3061, 3030, 2976, 2935, 2882, 1636, 1475, 1456, 1433, 1217, 1191, 1136, 1055, 1024, 785, 750, 698, 589, 555 cm-1. MS (EI) m/z (%) = 104.1(40), 105.1(100), 210.0(37), 262.0(22), 282.0(17), 386.1(4). HRMS (ESI) (m/z)[ C21H27N2O3P + H+]: Calcd. 387.1832, Found. 387.1839.

*(E,****Z****)-P*-Benzyloxy-*P-*phenyl-*N*-(*N, N*-diethylacrylamide) phosphonamide **(3fa/3fa’):** Gummy liquid. Yield: 70% yield (130.2 mg). 1H NMR (400 MHz, CDCl3) δ = 10.46 (t, *J* = 14.8 Hz, NH), 7.81 (dd, *J* = 13.5, 7.4 Hz, 2H), 7.52 (t, *J* = 7.2 Hz, 1H), 7.47 - 7.40 (m, 2H), 7.40 - 7.27 (m, 5H), 7.04 - 6.95 (m, 1H), 5.21 - 5.06 (m, 3H), 3.41 - 3.27 (m, 4H), 1.20 - 1.11 (m, 6H) ppm. 13C NMR (100 MHz, CDCl3) δ = 168.9, 142.1 (d, *JC-P* = 2.7 Hz), 136.0 (d, *JC-P* = 7.3 Hz), 132.6 (d, *JC-P* = 3.0 Hz), 131.3 (d, *JC-P* = 10.3 Hz), 129.8 (d, *JC-P* = 177.2 Hz), 128.7 (d, *JC-P* = 14.9 Hz), 128.7, 128.5, 128.1, 92.7 (d, *JC-P* = 8.3 Hz), 66.8 (d, *JC-P* = 5.8 Hz), 42.4, 40.4, 14.6, 13.4 ppm. 31P NMR (160 MHz, CDCl3) δ = 17.7 ppm. IR (in KBr): ν = 3225, 3061, 3034, 2978, 2935, 2876, 1636, 1456, 1436, 1381, 1213, 1136, 1054, 1024, 849, 802, 739, 696, 592, 552 cm-1. MS (EI) m/z (%) = 107.0(92), 141.0(40), 246.0(100), 372.1(15). HRMS (ESI) (m/z)[ C20H25N2O3P + H+]: Calcd. 373.1676, Found. 373.1689.

*(E,****Z****)-P*-2-Fluorobenzyl-*P-*phenyl-*N*-(*N,N*-diethylacrylamide) phosphonamide **(3ga/3ga’):** Gummy liquid. Yield: 62% yield (120.9 mg). 1H NMR (400 MHz, CDCl3) δ = 10.48 (q, *J* = 15.6 Hz, NH), 7.81 (dd, *J* = 13.7, 7.9 Hz, 2H), 7.52 (t, *J* = 7.3 Hz, 1.08H), 7.43 (dd, *J* = 12.0, 6.7 Hz, 3H), 7.32 - 7.26 (m, 1H), 7.12 (t, *J* = 7.5 Hz, 1.07H), 7.06 - 6.94 (m, 2H), 5.66 (d, *J* = 13.0 Hz, 0.08H), 5.18 (t, *J* = 9.5 Hz, 3H), 3.36 (dd, *J* = 13.6, 6.7 Hz, 2.14H), 3.30 (dd, *J* = 13.7, 6.7 Hz, 2.16H), 1.21 - 1.07 (m, 6.49H) ppm. 13C NMR (100 MHz, CDCl3) δ = 168.9, 160.8 (d, *JC-F* = 247.2 Hz), 142.0 (d, *JC-P* = 2.7 Hz), 132.6 (d, *JC-P* = 3.0 Hz), 131.3 (d, *JC-P* = 10.4 Hz), 130.5 (d, *JC-F* = 1.0 Hz), 130.4 (d, *J C-F* = 3.0 Hz), 129.6 (d, *JC-P* = 176.8 Hz), 128.7 (d, *JC-P* = 14.9 Hz), 124.4 (d, *J C-F* = 3.7 Hz), 123.4 (dd, *JC-F, C-P* = 14.5, 8.0 Hz), 115.5 (d, *J C-F* = 20.8 Hz), 92.8 (d, *JC-P* = 8.2 Hz), 60.8 (t, *J C-F,* *C-P*= 5.0 Hz), 42.4, 40.4, 14.6, 13.4 ppm. 31P NMR (160 MHz, CDCl3) δ = 17.9*(Z)*, 18.1*(E)* ppm. 19F NMR (376 MHz, CDCl3) δ = -118.3*(E)*, -118.0*(Z)* ppm. IR (in KBr): ν = 2965, 2938, 2908, 2876, 1647, 1634, 1622, 1614, 1539, 1456, 1260, 1217, 1129, 1101, 1087, 1069, 1018, 799, 756, 697, 669, 525 cm-1. MS (EI) m/z (%) = 109.0(100), 141.0(45), 265.0(18), 318.0(17), 390.1(8). HRMS (ESI) (m/z)[ C20H24FN2O3P + H+]: Calcd. 391.1581, Found. 391.1586.

*(E,****Z****)-P*-2-Chlorobenzyl-*P-*phenyl-*N*-(*N,N*-diethylacrylamide) phosphonamide **(3ha/3ha’):** gummy liquid with *n*-hexane/ethyl acetate (3/1) used aseluent in 60% yield (121.8 mg). 1H NMR (400 MHz, CDCl3) δ = 10.53 (d, *J* = 15.8 Hz, NH), 7.85 (dd, *J* = 13.6, 7.5 Hz, 2H), 7.57 - 7.43 (m, 4H), 7.35 (d, *J* = 7.3 Hz, 1H), 7.28 - 7.24 (m, 2H), 7.06 - 6.97 (m, 1H), 5.24 (d, *J* = 7.0 Hz, 2H), 5.18 (d, *J* = 8.7 Hz, 1H), 3.40 - 3.28 (m, 4H), 1.19 - 1.11 (m, 6H) ppm. 13C NMR (100 MHz, CDCl3) δ = 168.9, 141.9 (d, *J C-P* = 2.6 Hz), 133.8 (d, *J C-P* = 8.1 Hz), 133.2, 132.6 (d, *J C-P* = 3.0 Hz), 131.3 (d, *J C-P* = 10.4 Hz), 129.6, 129.6 (d, *J C-P* = 177.2 Hz), 129.5, 128.7 (d, *J C-P* = 14.9 Hz), 127.1, 92.8 (d, *J C-P* = 8.3 Hz), 64.0 (d, *J C-P* = 5.2 Hz), 42.4, 40.4, 14.6, 13.4 ppm. 31P NMR (160 MHz, CDCl3) δ = 18.0 ppm. IR (in KBr): ν = 3208, 3054, 2978, 2939, 2876, 1636, 1474, 1456, 1437, 1215, 1197, 1136, 1059, 1042, 844, 812, 752, 699, 555 cm-1. MS (EI) m/z (%) = 125.0(87), 141.0(34), 246.0(100), 333.9(10), 406.0(3). HRMS (ESI) (m/z) [M + H+]: Calcd. 407.1286, Found. 407.1289.

*(E,****Z****)-P*-4-Chlorobenzyl-*P-*phenyl-*N*-(*N, N*-diethylacrylamide) phosphonamide **(3ia/3ia’):** Gummy liquid. Yield: 63% yield (127.9 mg). 1H NMR (400 MHz, CDCl3) δ 10.48 (q, *J* = 15.6 Hz, NH), 7.80 (dd, *J* = 13.6, 7.4 Hz, 2H), 7.53 (t, *J* = 7.1 Hz, 1H), 7.47 - 7.41 (m, 2H), 7.31 (s, 4H), 7.01 - 6.93 (m, 1H), 5.16 (d, *J* = 8.6 Hz, 1H), 5.12 - 5.04 (m, 2H), 3.37 (q, *J* = 14.2 Hz, 2H), 3.30 (q, *J* = 14.2, 2H), 1.20 - 1.11 (m, 6H) ppm. 13C NMR (100 MHz, CDCl3) δ = 168.9, 142.0 (d, *J C-P* = 2.7 Hz), 134.6 (d, *J C-P* = 7.1 Hz), 134.4, 132.7 (d, *J C-P* = 3.2 Hz), 131.3 (d, *J C-P* = 10.3 Hz), 129.7 (d, *J C-P* = 176.8 Hz), 129.5, 128.9, 128.8 (d, *J C-P* = 14.9 Hz), 92.8 (d, *J C-P* = 8.1 Hz), 66.0 (d, *J C-P* = 5.6 Hz), 42.4, 40.4, 14.6, 13.4 ppm. 31P NMR (160 MHz, CDCl3) δ = 17.9 ppm. IR (in KBr): ν = 2978, 2936, 2875, 1647, 1636, 1488, 1456, 1437, 1214, 1204, 1049, 1028, 1013, 851, 804, 752, 698, 667, 548 cm-1. MS (EI) m/z (%) = 125.0(98), 141.0(100), 201.0(15), 281.0(40), 334.0(15), 406.0(8). HRMS (ESI) (m/z) [M + H+]: Calcd. 407.1286, Found. 407.1288.

*(E,****Z****)-P*-3-Bromobenzyl -*P-*phenyl-*N*-(N, N-diethylacrylamide) phosphonamide **(3ja/3ja’):** Gummy liquid. Yield: 65% (146.2 mg). 1H NMR (400 MHz, CDCl3) δ = 10.52 (q, *J* = 15.8 Hz, NH), 7.80 (dd, *J* = 13.6, 7.6 Hz, 2H), 7.58 - 7.49 (m, 2H), 7.48 - 7.40 (m, 3H), 7.31 (d, *J* = 7.7 Hz, 1H), 7.21 (t, *J* = 7.7 Hz, 1H), 7.02 - 6.93 (m, 1H), 5.17 (d, *J* = 8.6 Hz, 1H), 5.12 - 5.02 (m, 2H), 3.37 (dd, *J* = 14.2 Hz, 2H), 3.30 (q, *J* = 13.8, 2H), 1.20 - 1.11 (m, 6H) ppm. 13C NMR (100 MHz, CDCl3) δ = 168.9, 141.9 (*JC-P* = 2.5 Hz), 138.3 (*JC-P* = 7.3 Hz), 132.7 (*JC-P* = 3.1 Hz), 131.6, 131.3 (d, *J C-P* = 10.4 Hz), 131.0, 130.3, 129.6 (d, *J C-P* = 175.1 Hz), 128.8 (d, *J C-P* = 15.0 Hz), 126.6, 122.7, 92.8 (d, *J C-P* = 8.4 Hz), 65.8 (d, *J C-P* = 5.5 Hz), 42.4, 40.4, 14.6, 13.4 ppm. 31P NMR (160 MHz, CDCl3) δ = 18.0 ppm. IR (in KBr): ν = 2976, 2935, 2872, 1645, 1636, 1488, 1456, 1217, 1136, 1068, 1049, 1028, 783, 698, 519 cm-1. MS (EI) m/z (%) = 90.0(37), 141.0(100), 168.9(55), 326.9(17), 377.9(5). HRMS (ESI) (m/z)[ C20H24BrN2O3P + H+]: Calcd. 451.0781, Found. 451.0796.

*(E,****Z****)-P*-3-Chloropropyl-*P-*phenyl-*N*-(*N,N*-diethylacrylamide) phosphonamide **(3ka/3ka’):** Gummy liquid. Yield: 48% (85.9 mg). 1H NMR (400 MHz, CDCl3) δ = 10.45 (t, *J* = 13.6 Hz, NH), 7.79 (dd, *J* = 13.5, 7.3 Hz, 2H), 7.56 - 7.51 (m, 1H), 7.48 - 7.43 (m, 2H), 7.02 - 6.93 (m, 1H), 5.17 (d, *J* = 8.5 Hz, 1H), 4.29 - 4.21 (d, *J* = 4.8 Hz, 2H), 3.66 (t, *J* = 6.3 Hz, 2H), 3.37 (q, *J* = 13.2 Hz, 2H), 3.31 (q, *J* = 13.4, 2H), 2.19 - 2.12 (m, 2H), 1.19 - 1.11 (m, 6H) ppm. 13C NMR (101 MHz, CDCl3) δ = 168.9, 142.0 (d, *J C-P* = 2.9 Hz), 132.6 (d, *J C-P* = 2.9 Hz), 131.2 (d, *J C-P* = 10.3 Hz), 129.7 (d, *J C-P* = 175.1 Hz), 128.7 (d, *J C-P* = 14.9 Hz), 92.7 (d, *J C-P* = 8.3 Hz), 62.0 (d, *J C-P* = 5.9 Hz), 42.4, 40.9, 40.4, 33.3 (d, *J C-P* = 6.6 Hz), 14.6, 13.4 ppm. 31P NMR (160 MHz, CDCl3) δ = 17.6 ppm. IR (in KBr): ν = 2972, 2942, 1717, 1636, 1541, 1456, 1257, 1184, 1162, 1138, 1040, 799, 750, 697, 669, 548 cm-1. MS (EI) m/z (%) = 140.0(100), 158.0(82), 198.0(69), 210.0(27), 286.0(16), 358.0(5). HRMS (ESI) (m/z) [M + H+]: Calcd. 359.1286, Found. 359.1288.

(*E,Z*)-*P*-(1-Phenylethoxy)-*P*-phenyl-*N*-(3-(4-(2-chlorodibenzo[*b,f*][1,4]oxazepin-11-yl)piperazin-1-yl)-3-oxoprop-1-en-1-yl) phosphonamide (**3ej**): Gummy liquid. Yield: 45% (140.8 mg). 1H NMR (400 MHz, CDCl3) δ = 10.19 (t, *J* = 13.6 Hz, NH), 7.72 (dd, *J* = 13.5, 7.4 Hz, 2H), 7.52 (t, *J* = 7.2 Hz, 1H), 7.46 - 7.39 (m, 3H), 7.33 - 7.27 (m, 3H), 7.25 - 7.18 (m, 4H), 7.14 - 7.07 (m, 3H), 7.01 (t, *J* = 8.9 Hz, 2H), 5.21 (d, *J* = 8.6 Hz, 1H), 4.35 - 4.23 (m, 2H), 3.78 - 3.49 (m, 8H), 3.05 (t, *J* = 7.0 Hz, 2H) ppm. 13C NMR (100 MHz, CDCl3) δ = 168.6, 159.4, 158.7, 151.8, 143.4(d, *JC-P* = 3.7 Hz), 139.9, 137.1, 132.9, 132.6 (d, *J* = 3.0 Hz), 131.2 (d, *J* = 10.3 Hz), 130.5, 129.7(d, *JC-P* = 177.3 Hz), 129.2, 128.9 (d, *JC-P* = 14.9 Hz), 128.7, 127.2, 126.8, 126.0, 125.1, 124.9, 123.0, 120.3, 91.2 (d, *JC-P* = 8.3 Hz), 65.8 (d, *JC-P* = 6.2 Hz), 47.4, 45.0, 40.8, 37.0 (d, *JC-P* = 6.9 Hz) ppm. 31P NMR (160 MHz, CDCl3) δ = 17.0 ppm. IR (in KBr): ν = 3032, 2982, 2928, 2880, 1619, 1480, 1455, 1216, 1191, 1136, 1052, 998, 786, 752, 688, 590, 551 cm-1. MS (EI) m/z (%) = 104.0(100), 245.0(50), 257.0(39), 269.0(32), 314.0(38), 366.0(16), 625.9(43). HRMS (ESI) (m/z) [M + H+]: Calcd. 627.1922, Found. 627.1946.

1-(4-(2-chlorodibenzo[b,f][1,4]oxazepin-11-yl)piperazin-1-yl)prop-2-en-1-one (**2j**): Gummy liquid. Yield: 95% yield (100.0 mg). 1H NMR (400 MHz, CDCl3) δ = 7.37 (d, *J* = 8.6 Hz, 1H), 7.28 (s, 1H), 7.19 - 7.11 (m, 2H), 7.07 (t, *J* = 7.9 Hz, 2H), 6.99 (t, *J* = 7.5 Hz, 1H), 6.62 - 6.50 (m, 1H), 6.30 (d, *J* = 16.8 Hz, 1H), 5.71 (d, *J* = 10.5 Hz, 1H), 3.84 - 3.43 (m, 8H) ppm. 13C NMR (100 MHz, CDCl3) δ = 165.6, 159.3, 158.6, 151.7, 139.8, 132.8, 130.4, 128.8, 128.4, 127.2, 127.1, 125.8, 125.0, 124.7, 122.8, 120.2, 47.4, 45.3, 41.7 ppm. MS (EI) m/z (%) = 193.0 (35), 228.0 (34), 244.0 (48), 257.0 (100), 269.0 (90), 367.0 (58). HRMS (ESI) (m/z) [M + H+]: Calcd. 368.1160, Found. 368.1172.

*(****E****)-P*-Ethoxy-*P-*phenyl-*N*-( methyl acrylate) phosphonamide **(5aa):** Gummy liquid. Yield: 28% (37.7 mg). 1H NMR (400 MHz, CDCl3) δ = 7.75 (dd, *J* = 13.3, 7.4 Hz, 2H), 7.55 (t, *J* = 7.1 Hz, 1H), 7.48-7.42 (m, 2H), 7.36 (t, *J* = 9.3 Hz, 2H), 5.42 - 5.21 (m, 1H), 4.25 - 4.12 (m, 2H), 3.64 (s, 3H), 1.39 (t, *J* = 6.6 Hz, 3H) ppm. 13C NMR (100 MHz, CDCl3) δ = 168.3 (s), 142.9 (d, *JC-P* = 2.1 Hz), 132.9 (d, *JC-P* = 3.0 Hz), 131.3 (d, *JC-P* = 10.2 Hz), 129.0 (d, *JC-P* = 177.3 Hz), 128.9 (d, *JC-P* = 15.0 Hz), 99.1 (d, *JC-P* = 10.6 Hz), 61.9 (d, *JC-P* = 6.2 Hz), 51.2 (s), 16.4 (d, *JC-P* = 6.5 Hz) ppm. 31P NMR (160 MHz, CDCl3) δ = 17.6 (s) ppm. IR (in KBr): ν = 2963, 2907, 1734, 1717, 1639, 1558, 1508, 1437, 1261, 1195, 1129, 1083, 1040, 799, 750, 698, 670, 550, 517 cm-1. MS (EI) m/z (%) = 141.0(100), 170.1(37), 210.1(38), 269.1(58). HRMS (ESI) (m/z) [M + H+]: Calcd. 270.0890, Found. 270.0898.

*(****Z****)-P*-Ethoxy-*P-*phenyl-*N*-(methyl acrylate) phosphonamide **(5aa’):** Gummy liquid. Yield: 54% yield (72.6 mg). 1H NMR (400 MHz, CDCl3) δ = 9.01 (t, *J* = 12.7 Hz, NH), 7.78 (dd, *J* = 13.4, 7.5 Hz, 2H), 7.55 (t, *J* = 7.2 Hz, 1H), 7.50 - 7.42 (m, 2H), 7.08 - 6.96 (m, 1H), 4.99 (d, *J* = 8.4 Hz, 1H), 4.24 - 4.12 (m, 2H), 3.67 (s, 3H), 1.38 (t, *J* = 6.9 Hz, 3H) ppm. 13C NMR (100 MHz, CDCl3) δ = 170.2 (s), 144.6 (d, *J C-P* = 3.0 Hz), 132.8 (d, *J C-P* = 3.0 Hz), 131.2 (d, *J C-P* = 10.3 Hz), 129.5 (d, *J C-P* = 8.6 Hz), 128.8 (t, *J C-P* = 12.6 Hz), 93.2 (d, *J C-P* = 8.6 Hz), 61.9 (d, *J C-P* = 6.0 Hz), 51.0 (s), 16.4 (d, *J C-P* = 6.5 Hz) ppm. 31P NMR (160 MHz, CDCl3) δ = 16.7 (s) ppm. HRMS (ESI) (m/z) [M + H+]: Calcd. 270.0890, Found. 270.0895.

*(****E****)-P*-Methoxy-*P-*phenyl-*N*-(methyl acrylate) phosphonamide **(5ba):** Gummy liquid. Yield: 36% (45.9 mg). 1H NMR (400 MHz, CDCl3) δ = 7.82 (d, *J* = 9.4 Hz, 1H), 7.73 (dd, *J* = 13.3, 7.5 Hz, 2H), 7.54 (t, *J* = 6.7 Hz, NH), 7.46 - 7.40 (m, 2H), 7.33 (q, *J* = 12.4 Hz, 1H), 5.33 (d, *J* = 13.6 Hz, 1H), 3.78 (d, *J* = 11.4 Hz, 3H), 3.63 (s, 3H) ppm. 13C NMR (100 MHz, CDCl3) δ = 168.4, 142.9, 132.9 (d, *JC-P* = 2.8 Hz), 131.3 (d, *JC-P* = 10.3 Hz), 128.9 (d, *JC-P* = 15.0 Hz), 128.5 (d, *JC-P* = 177.8 Hz), 99.2 (d, *JC-P* = 10.9 Hz), 51.8 (d, *JC-P* = 6.2 Hz), 51.2 ppm. 31P NMR (160 MHz, CDCl3)  = 19.5 ppm. IR (in KBr): ν = 2949, 2903, 2844, 1732, 1717, 1539, 1456, 1432, 1182, 1136, 1043, 787, 750, 700, 555 cm-1. MS (EI) m/z (%) = 155.1(100), 156.1(70), 224.1(35), 255.1(70). HRMS (ESI) (m/z)[ C11H14NO4P + H+]: Calcd. 256.0733, Found. 256.0743.

*(****Z****)-P*-Methoxy-*P-*phenyl-*N*-(methyl acrylate) phosphonamide **(5ba’):** Gummy liquid. Yield: 44% (56.1 mg). 1H NMR (400 MHz, CDCl3) δ = 9.01 (t, *J* = 12.2 Hz, NH), 7.77 (dd, *J* = 13.4, 7.5 Hz, 2H), 7.56 (t, *J* = 7.0 Hz, 1H), 7.51 - 7.43 (m, 2H), 7.07 - 6.98 (m, 1H), 5.01 (d, *J* = 8.4 Hz, 1H), 3.81 (d, *J* = 11.4 Hz, 3H), 3.68 (s, 3H) ppm. 13C NMR (100 MHz, CDCl3) δ = 170.2, 144.5 (d, J*C-P* = 2.8 Hz), 132.9 (d, J*C-P* = 3.0 Hz), 131.2 (*JC-P* = 10.3 Hz), 128.9 (*JC-P* = 178.1 Hz), 128.87 (d, J*C-P* = 15.0 Hz), 93.5 (d, J*C-P* = 8.7 Hz), 52.0 (d, J*C-P* = 6.1 Hz), 51.0 ppm. 31P NMR (160 MHz, CDCl3) δ = 18.3 (s) ppm. HRMS (ESI) (m/z)[ C11H14NO4P + H+]: Calcd. 256.0733, Found. 256.0739.

*(****E****)-P*-Isopropoxy-*P-*phenyl-*N*-(methyl acrylate) phosphonamide **(5ca):** Gummy liquid. Yield: 30% (42.4 mg). 1H NMR (400 MHz, CDCl3) δ = 7.75 (dd, *J* = 13.0, 7.8 Hz, 2H), 7.64 - 7.49 (m, 2H), 7.47 - 7.42 (m, 2H), 7.35 (q, *J* = 12.4 Hz, 1H), 5.29 (d, *J* = 13.4 Hz, 1H), 4.83 - 4.75 (m, 1H), 3.64 (s, 3H), 1.384 (s, 3H),1.379 (s, 3H) ppm. 13C NMR (100 MHz, CDCl3) δ = 168.4 (s), 143.2 (s), 132.7 (d, *J C-P* = 2.3 Hz), 131.3 (d, *J C-P* = 10.3 Hz), 129.6 (d, *J C-P* = 175.3 Hz), 128.8 (d, *J C-P* = 15.0 Hz), 98.8 (d, *J C-P* = 10.9 Hz), 71.5 (d, *J C-P* = 5.9 Hz), 51.2 (s), 24.3 (d, *J C-P* = 4.2 Hz), 24.0 (d, *J C-P* = 4.4 Hz) ppm. 31P NMR (160 MHz, CDCl3) δ = 16.4 ppm. IR (in KBr): ν = 2963, 2905, 2842, 1734, 1717, 1698, 1647, 1558, 1541, 1510, 1456, 1260, 1197, 1086, 1018, 799, 669, 548 cm-1. MS (EI) m/z (%) = 101.1(78), 141.1(100), 210.1(64), 241.1(73), 283.1(37). HRMS (ESI) (m/z) [M + H+]: Calcd. 284.1046, Found. 284.1050.

*(****Z****)-P*-Isopropoxy-*P-*phenyl-*N*-(methyl acrylate) phosphonamide **(5ca’):** Gummy liquid. Yield: 46% (65.1 mg). 1H NMR (400 MHz, CDCl3) δ = 8.99 (t, *J* = 12.8 Hz, NH), 7.76 (dd, *J* = 13.2, 7.5 Hz, 2H), 7.52 (t, *J* = 6.6 Hz, 1H), 7.48 - 7.41 (m, 2H), 7.06 - 6.96 (m, 1H), 4.96 (d, *J* = 8.3 Hz, 1H), 4.84 - 4.74 (m, 1H), 3.66 (s, 3H), 1.38 (d, *J* = 5.8 Hz, 3H), 1.35 (d, *J* = 5.8 Hz, 3H) ppm. 13C NMR (100 MHz, CDCl3) δ = 170.2, 144.7 (d, *J C-P* = 2.8 Hz), 132.6 (d, *J C-P* = 3.0 Hz), 131.1 (d, *J C-P* = 10.2 Hz), 130.1 (d, *J C-P* = 178.0 Hz), 128.7 (d, *J C-P* = 14.9 Hz), 93.0 (d, *J C-P* = 8.6 Hz), 71.3 (d, *J C-P* = 6.1 Hz), 50.9, 24.2(d, *J C-P* = 4.6 Hz), 24.1 (d, *J C-P* = 4.2 Hz) ppm. 31P NMR (160 MHz, CDCl3) δ = 15.4 ppm. HRMS (ESI) (m/z) [M + H+]: Calcd. 284.1046, Found. 284.1049.

*(****E****)-P*-cyclohexyloxy-*P-*phenyl-*N*-( methyl acrylate) phosphonamide **(5da):** Gummy liquid with *n*-hexane/ethyl acetate (2/1) used aseluent in 32% yield (51.7 mg). 1H NMR (400 MHz, CDCl3) δ = 7.75 (dd, *J* = 12.9, 7.2 Hz, 2H), 7.53 (d, *J* = 6.6 Hz, 1H), 7.48 - 7.41 (m, 2H), 7.36 (t, *J* = 9.5 Hz, 2H), 5.28 (d, *J* = 10.5 Hz, 1H), 4.58 - 4.49 (m, 1H), 3.63 (s, 3H), 1.94 (s, 2H), 1.74 (s, 2H), 1.61 (d, *J* = 6.8 Hz, 2H), 1.50 (d, *J* = 5.5 Hz, 1H), 1.33 (d, *J* = 11.3 Hz, 1H), 1.30 - 1.21 (m, 2H) ppm. 13C NMR (100 MHz, CDCl3) δ = 168.4, 143.2 (d, *J C-P* = 2.5 Hz), 132.7 (d, *J C-P* = 3.1 Hz), 131.3 (d, *J C-P* = 10.4 Hz), 129.7 (d, *J C-P* = 177.2 Hz), 128.9 (d, *J C-P* = 14.9 Hz), 98.8 (d, *J C-P* = 10.5 Hz), 76.3 (d, *J C-P* = 6.5 Hz), 51.2, 33.9 (d, *J C-P* = 3.8 Hz), 33.6 (d, *J C-P* = 3.4 Hz), 25.2, 23.7, 23.6 ppm. 31P NMR (160 MHz, CDCl3) δ = 15.7 ppm. IR (in KBr): ν = 2963, 2938, 2858, 1717, 1697, 1508, 1456, 1261, 1184, 1133, 1090, 1037, 1018, 865, 800, 696, 569 cm-1. MS (EI) m/z (%) = 101.1(73), 142.0(35), 210.1(50), 241.1(100), 323.1(23). HRMS (ESI) (m/z)[ C16H22NO4P + H+]: Calcd. 324.1359, Found. 324.1366.

*(****Z****)-P*-cyclohexyloxy-*P-*phenyl-*N*-( methyl acrylate) phosphonamide **(5da’):** gummy liquid with *n*-hexane/ethyl acetate (5/1) used aseluent in 36% yield (58.1 mg). 1H NMR (400 MHz, CDCl3) δ = 8.98 (t, *J* = 13.2 Hz, NH), 7.77 (dd, *J* = 13.4, 7.7 Hz, 2H), 7.53 (t, *J* = 7.3 Hz, 1H), 7.48 - 7.42 (m, 2H), 7.07 - 6.98 (m, 1H), 4.97 (d, *J* = 8.4 Hz, 1H), 4.58 - 4.49 (m, 1H), 3.67 (s, 3H), 1.95 (s, 2H), 1.74 (s, 2H), 1.66 - 1.56 (m, 10.4 Hz, 2H), 1.50 (d, *J* = 7.5 Hz, 1H), 1.35 (d, *J* = 12.2 Hz, 1H), 1.32 - 1.21 (m, 2H). 13C NMR (100 MHz, CDCl3) δ = 170.2, 144.8 (d, *J C-P* = 2.8 Hz), 132.6 (d, *J C-P* = 3.0 Hz), 131.2 (d, *J C-P* = 10.2 Hz), 130.3 (d, *J C-P* = 176.0 Hz), 128.7 (d, *J C-P* = 15.0 Hz), 92.9 (d, *J C-P* = 8.7 Hz), 76.0 (d, *J C-P* = 6.4 Hz), 51.0, 33.8 (d, *J C-P* = 4.2 Hz), 33.77 (d, *J C-P* = 3.8 Hz), 25.2, 23.7, 23.6 ppm. 31P NMR (160 MHz, CDCl3) δ = 15.3 ppm. HRMS (ESI) (m/z)[ C16H22NO4P + H+]: Calcd. 324.1359, Found. 324.1368.

*(****E****)-P*-1-Phenylethoxy-*P-*phenyl-*N*-(methyl acrylate) phosphonamide **(5ea):** gummy liquid. Yield: 52% (89.7 mg). 1H NMR (400 MHz, CDCl3) δ = 7.65 (dd, *J* = 13.3, 7.6 Hz, 2H), 7.53 (t, *J* = 7.0 Hz, 1H), 7.44 - 7.38 (m, 2H), 7.32 - 7.24 (m, 4H), 7.21 (d, *J* = 5.9 Hz, 3H), 5.23 (d, *J* = 13.1 Hz, 1H), 4.35 – 4.22 (m, 2H), 3.64 (s, 3H), 3.03 (t, *J* = 6.6 Hz, 2H) ppm. 13C NMR (100 MHz, CDCl3) δ = 168.2, 142.8 (d, *J C-P* = 2.4 Hz), 137.0, 132.8 (d, *J C-P* = 2.9 Hz), 131.2 (d, *J C-P* = 10.3 Hz), 129.2, 128.9, 128.8, 128.7 (d, *J C-P* = 177.7 Hz), 127.0, 99.2 (d, *J C-P* = 10.7 Hz), 66.0 (d, *J C-P* = 6.4 Hz), 51.2, 36.9 (d, *J C-P* = 6.6 Hz) ppm. 31P NMR (160 MHz, CDCl3) δ = 17.8 ppm. IR (in KBr): ν = 3062, 3030, 2963, 2903, 1732, 1717, 1695, 1454, 1437, 1258, 1196, 1132, 1087, 1055, 1022, 859, 795, 751, 698, 548 cm-1. MS (EI) m/z (%) = 142.1(24), 241.1(100), 345.1(2). HRMS (ESI) (m/z)[ C18H20NO4P + H+]: Calcd. 346.1203, Found. 346.1215.

*(****Z****)-P*-1-Phenylethoxy-*P-*phenyl-*N*-(methyl acrylate) phosphonamide **(5ea’):** Gummy liquid. Yield: 30% (51.8 mg). 1H NMR (400 MHz, CDCl3) δ = 8.97 (t, *J* = 13.3 Hz, NH), 7.69 (dd, *J* = 13.5, 7.2 Hz, 2H), 7.54 (t, *J* = 6.8 Hz, 1H), 7.47 - 7.41 (m, 2H), 7.31 (t, *J* = 7.2 Hz, 2H), 7.22 (d, *J* = 6.7 Hz, 3H), 6.96 - 6.86 (m, 1H), 4.96 (d, *J* = 8.3 Hz, 1H), 4.37 - 4.26 (m, 2H), 3.68 (s, 3H), 3.05 (t, *J* = 6.9 Hz, 2H). 13C NMR (100 MHz, CDCl3) δ = 170.1, 144.3 (d, *J C-P* = 3.0 Hz), 137.0, 132.8 (d, *J C-P* = 3.1 Hz), 131.2 (d, *J C-P* = 10.4 Hz), 129.2 (d, *J C-P* = 177.5 Hz), 129.1, 128.9, 128.7, 126.9, 93.4 (d, *J C-P* = 8.6 Hz), 66.0 (d, *J C-P* = 6.2 Hz), 51.0, 36.9 (d, *J C-P* = 6.7 Hz). 31P NMR (160 MHz, CDCl3) δ = 16.9 ppm. HRMS (ESI) (m/z)[ C18H20NO4P + H+]: Calcd. 346.1203, Found. 346.1210.

*(****E****)-P*-benzyloxy-*P-*phenyl-*N*-(methyl acrylate) phosphonamide **(5fa):** Gummy liquid. Yield: 49% (81.1 mg). 1H NMR (400 MHz, CDCl3) δ = 7.76 (dd, *J* = 13.4, 7.5 Hz, 2H), 7.55 (t, *J* = 6.9 Hz, 1H), 7.48 - 7.40 (m, 3H), 7.40 - 7.33 (m, 6H), 5.30 (d, *J* = 12.9 Hz, 1H), 5.20 - 5.06 (m, 2H), 3.63 (s, 3H). 13C NMR (100 MHz, CDCl3) δ = 168.2, 142.6 (d, *J C-P* = 1.9 Hz), 135.4 (d, *J C-P* = 7.1 Hz), 133.0 (d, *J C-P* = 3.0 Hz), 131.4 (d, *J C-P* = 10.4 Hz),129.0, 128.8, 128.7 (d, *J C-P* = 177.4 Hz), 128.3, 127.8, 99.4 (d, *J C-P* = 10.6 Hz), 67.1 (d, *J C-P* = 5.9 Hz), 51.2 ppm. 31P NMR (160 MHz, CDCl3) δ = 18.4 ppm. IR (in KBr): ν = 3198, 3065, 3033, 2953, 1734, 1717, 1696, 1454, 1437, 1394, 1258, 1192, 1136, 1055, 1024, 851, 800, 750, 696, 592, 555 cm-1. MS (EI) m/z (%) = 141.1(26), 158.1(100), 190.2(53), 272.1(76), 331.1(72). HRMS (ESI) (m/z)[ C17H18NO4P + H+]: Calcd. 332.1046, Found. 332.1051.

*(****Z****)-P*-2-Fluorophenylmethoxy -*P-*phenyl-*N*-(methyl acrylate) phosphonamide **(5fa’):** gummy liquid with *n*-hexane/ethyl acetate (6/1) used aseluent in 29% yield (48.0 mg). 1H NMR (400 MHz, CDCl3) δ = 9.04 (t, *J* = 13.1 Hz, NH), 7.79 (dd, *J* = 13.5, 7.6 Hz, 2H), 7.56 (t, *J* = 7.1 Hz, 1H), 7.49 - 7.44 (m, 2H), 7.41 - 7.32 (m, 5H), 7.06 - 6.99 (m, 1H), 5.18 - 5.10 (m, 2H), 4.99 (d, *J* = 8.4 Hz, 1H), 3.68 (s, 3H) ppm. 13C NMR (100 MHz, CDCl3) δ = 170.1, 144.3 (d, *J C-P* = 2.8 Hz), 135.7 (d, *J C-P* = 7.1 Hz), 132.9 (d, *J C-P* = 3.1 Hz), 131.3 (d, *J C-P* = 10.4 Hz), 129.2 (d, *J C-P* = 177.2 Hz), 128.9, 128.8, 128.77 (d, *J C-P* = 5.4 Hz), 128.2, 93.5 (d, *J C-P* = 8.8 Hz), 67.1 (d, *J C-P* = 5.8 Hz), 51.0 ppm. 31P NMR (160 MHz, CDCl3) δ = 17.4 ppm. HRMS (ESI) (m/z)[ C17H18NO4P + H+]: Calcd. 332.1046, Found. 332.1053.

*(****E****)-P*-2-Fluorophenylmethoxy-*P-*phenyl-*N*-(methyl acrylate) phosphonamide **(5ga):** gummy liquid with *n*-hexane/ethyl acetate (3/1) used aseluent in 41% yield (71.5 mg). 1H NMR (400 MHz, CDCl3) δ = 7.77 (dd, *J* = 13.5, 7.5 Hz, 2H), 7.55 (t, *J* = 7.2 Hz, 1H), 7.47 - 7.41 (m, 3H), 7.37 - 7.26 (m, 3H), 7.14 (t, *J* = 7.4 Hz, 1H), 7.06 (t, *J* = 9.1 Hz, 1H), 5.29 (d, *J* = 13.1 Hz, 1H), 5.21 (d, *J* = 7.9 Hz, 2H), 3.63 (s, 3H) ppm. 13C NMR (100 MHz, CDCl3) δ = 168.1, 161.0 (d, *J C-F* = 247.5 Hz), 142.5 (d, *J C-P* = 2.0 Hz), 133.1 (d, *J C-P* = 2.8 Hz), 131.4 (d, *J C-P* = 10.5 Hz), 130.9 (d, *J C-P* = 8.2 Hz), 130.8 (d, *J C-F* = 3.5 Hz), 129.0, 128.8, 128.6 (d, *J C-P* = 177.7 Hz), 124.5 (d, *J C-F* = 3.8 Hz), 115.7 (d, *J C-F* = 21.0 Hz), 99.5 (d, *J C-P* = 10.8 Hz), 61.1 (t, *J C-F; C-P* = 5.0 Hz), 51.2 ppm. 19F NMR (376 MHz, CDCl3) δ = -117.7 ppm. 31P NMR (160 MHz, CDCl3) δ = 18.4 ppm. IR (in KBr): ν = 3198, 2964, 2903, 2840, 1734, 1717, 1695, 1508, 1456, 1394, 1260, 1233, 1194, 1052, 1020, 754, 698, 667, 557 cm-1. MS (EI) m/z (%) = 109.1(100), 177.1(15), 209.1(14), 349.1(20). HRMS (ESI) (m/z)[ C17H17FNO4P + H+]: Calcd. 350.0952, Found. 350.0958.

*(****Z****)-P*-2-Fluorophenylmethoxy-*P-*phenyl-*N*-(methyl acrylate) phosphonamide **(5ga’):** gummy liquid with *n*-hexane/ethyl acetate (6/1) used aseluent in 35% yield (61.1mg). 1H NMR (400 MHz, CDCl3) δ = 9.06 (t, *J* = 13.4 Hz, 1H), 7.79 (dd, *J* = 13.7, 7.5 Hz, 2H), 7.55 (t, *J* = 7.2 Hz, 1H), 7.49 - 7.41 (m, 3H), 7.35 - 7.29 (m, 1H), 7.14 (t, *J* = 7.6 Hz, 1H), 7.08 - 6.97 (m, 2H), 5.21 (t, *J* = 8.6 Hz, 2H), 4.99 (d, *J* = 8.4 Hz, 1H), 3.67 (s, 3H) ppm. 13C NMR (100 MHz, CDCl3) δ = 170.1, 160.9 (d, *J C-F* = 247.2 Hz), 144.2 (d, *J C-P* = 2.9 Hz), 132.9 (d, *J C-P* = 3.0 Hz), 131.3 (d, *J C-P* = 10.4 Hz), 130.8 (d, *J C-P* = 8.1 Hz), 130.6 (d, *J C-F* = 3.5 Hz), 129.0 (d, *J C-P* = 177.2 Hz), 128.9, 128.8, 124.4 (d, *J C-F* = 3.7 Hz), 115.7 (d, *J C-F* = 20.8 Hz), 93.6 (d, *J C-P* = 8.8 Hz), 61.2 (t, *J C-F; C-P* = 4.9 Hz), 51.0 ppm. 19F NMR (376 MHz, CDCl3) δ = -117.8 ppm. 31P NMR (160 MHz, CDCl3) δ = 17.6 ppm. HRMS (ESI) (m/z)[ C17H17FNO4P + H+]: Calcd. 350.0952, Found. 350.0955.

*(****E****)-P*-2-Chlorophenylmethoxy-*P-*phenyl-*N*-(methyl acrylate) phosphonamide **(5ha):** Gummy liquid. Yield: 40% (73.0 mg). 1H NMR (400 MHz, CDCl3) δ = 7.80 (dd, *J* = 13.5, 7.5 Hz, 2H), 7.57 (t, *J* = 7.1 Hz, 1H), 7.51 - 7.45 (m, 3H), 7.41 - 7.33 (m, 2H), 7.31 - 7.25 (m, 3H), 5.32 - 5.23 (m, 3H), 3.64 (s, 3H) ppm. 13C NMR (100 MHz, CDCl3) δ = 168.1, 142.4 (d, *J C-P* = 1.9 Hz), 133.6, 133.2 (d, *J C-P* = 7.7 Hz), 133.1 (d, *J C-P* = 2.9 Hz), 131.4 (d, *J C-P* = 10.5 Hz), 130.08 (d, *J C-P* = 7.9 Hz), 129.8, 129.1, 128.9, 128.5 (d, *J C-P* = 177.4 Hz), 127.2, 99.6 (d, *J C-P* = 10.8 Hz), 64.4 (d, *J C-P* = 5.4 Hz), 51.2 ppm. 31P NMR (160 MHz, CDCl3) δ = 18.5 ppm. IR (in KBr): ν = 3195, 3065, 2965, 2907, 2841, 1732, 1696, 1679, 1717, 1557, 1506, 1456, 1433, 1258, 1192, 1138, 1059, 1036, 1026, 848, 799, 750, 555 cm-1. MS (EI) m/z (%) = 125.1(100), 127.1(34), 298.1(68), 330.1(82), 365.1(2). HRMS (ESI) (m/z)[ C17H17ClNO4P + H+]: Calcd. 366.0656, Found. 366.0667.

*(****Z****)-P*-2-Chlorophenylmethoxy-*P-*phenyl-*N*-(methyl acrylate) phosphonamide **(5ha’):** Gummy liquid. Yield: 37% (67.5 mg). 1H NMR (400 MHz, CDCl3) δ = 9.10 (t, *J* = 13.2 Hz, NH), 7.82 (dd, *J* = 13.5, 7.7 Hz, 2H), 7.57 (t, *J* = 7.2 Hz, 1H), 7.51 - 7.45 (m, 3H), 7.41 - 7.36 (m, 1H), 7.30 - 7.27 (m, 2H), 7.09 - 7.01 (m, 1H), 5.29 - 5.23 (m, 2H), 5.01 (d, *J* = 8.4 Hz, 1H), 3.69 (s, 3H) ppm. 13C NMR (100 MHz, CDCl3) δ = 170.1, 144.2 (d, *J C-P* = 2.9 Hz), 133.6, 133.4 (d, *J C-P* = 7.8 Hz), 133.0 (d, *J C-P* = 3.1 Hz), 131.3 (d, *J C-P* = 10.4 Hz), 129.9 (d, *J C-P* = 10.8 Hz), 129.7, 129.0 (d, *J C-P* = 175.7 Hz), 129.0, 128.8, 127.2, 93.7 (d, *J C-P* = 8.8 Hz), 64.4 (d, *J C-P* = 5.4 Hz), 51.1 ppm. 31P NMR (160 MHz, CDCl3) δ = 17.6 ppm. HRMS (ESI) (m/z)[ C17H17ClNO4P + H+]: Calcd. 366.0656, Found. 366.0664.

*(****E****)-P*-4-Chlorophenylmethoxy-*P-*phenyl-*N*-(methyl acrylate) phosphonamide **(5ia):** Gummy liquid. Yield: 40% yield (73.0 mg). 1H NMR (400 MHz, CDCl3) δ = 7.75 (dd, *J* = 13.4, 7.4 Hz, 2H), 7.57 (t, *J* = 6.9 Hz, 1H), 7.49 - 7.42 (m, 2H), 7.37 - 7.26 (m, 5H), 7.17 (t, *J* = 11.2 Hz, 1H), 5.28 (d, *J* = 13.4 Hz, 1H), 5.17 - 5.00 (m, 2H), 3.64 (s, 3H) ppm. 13C NMR (100 MHz, CDCl3) δ = 168.1, 142.4 (d, *J C-P* = 1.7 Hz), 134.8, 133.9 (d, *J C-P* = 6.6 Hz), 133.2 (d, *J C-P* = 3.0 Hz), 131.4 (d, *J C-P* = 10.5 Hz), 129.7, 129.1, 128.9, 128.4 (d, *J C-P* = 177.9 Hz), 99.6 (d, *J C-P* = 10.6 Hz), 66.4 (d, *J C-P* = 5.8 Hz), 51.3 ppm. 31P NMR (160 MHz, CDCl3) δ = 18.5 ppm. IR (in KBr): ν = 2965, 2903, 1730, 1717, 1699, 1678, 1650, 1559, 1541, 1506, 1454, 1339, 1202, 1260, 1135, 1086, 1023, 1013, 799, 669, 550 cm-1. MS (EI) m/z (%) = 125.1 (100), 127.1(33), 210.1(39), 306.1(28), 365.1(15). HRMS (ESI) (m/z)[ C17H17ClNO4P + H+]: Calcd. 366.0656, Found. 366.0669.

*(****Z****)-P*-4-Chlorophenylmethoxy-*P-*phenyl-*N*-(methyl acrylate) phosphonamide **(5ia’):** Gummy liquid. Yield: 27% yield (49.3 mg). 1H NMR (400 MHz, CDCl3) δ = 9.04 (t, *J* = 13.4 Hz, NH), 7.77 (dd, *J* = 13.6, 7.5 Hz, 2H), 7.56 (t, *J* = 7.2 Hz, 1H), 7.46 (d, *J* = 4.3 Hz, 2H), 7.32 (s, 4H), 7.05 - 6.96 (m, 1H), 5.15 - 5.06 (m, 2H), 4.99 (d, *J* = 8.4 Hz, 1H), 3.68 (s, 3H) ppm. 13C NMR (100 MHz, CDCl3) δ = 170.2, 144.2 (d, *J* *C-P* = 2.8 Hz), 134.7, 134.2 (d, *J C-P* = 6.7 Hz), 133.0 (d, *J C-P* = 3.0 Hz), 131.2 (d, *J C-P* = 10.4 Hz), 129.6, 129.0, 128.98 (d, *J C-P* = 177.6 Hz),128.9(d, *J C-P* = 15.0 Hz), 93.7 (d, *J C-P* = 8.7 Hz), 66.3 (d, *J C-P* = 5.7 Hz), 51.1 ppm. 31P NMR (160 MHz, CDCl3) δ = 17.7 ppm. HRMS (ESI) (m/z)[ C17H17ClNO4P + H+]: Calcd. 366.0656, Found. 366.0670.

*(****E****)-P*-3-Bromophenylmethoxy-*P-*phenyl-*N*-(methyl acrylate) phosphonamide **(5ja):** Gummy liquid. Yield: 43% (87.9 mg). 1H NMR (400 MHz, CDCl3) δ = 7.77 (dd, *J* = 13.6, 7.5 Hz, 2H), 7.58 (t, *J* = 7.2 Hz, 1H), 7.52 (s, 1H), 7.50 - 7.45 (m, 3H), 7.39 - 7.30 (m, 2H), 7.23 (t, *J* = 8.0 Hz, 1H), 7.01 (t, *J* = 11.0 Hz, 1H), 5.30 (d, *J* = 13.6 Hz, 1H), 5.16 - 5.03 (m, 2H), 3.66 (s, 3H) ppm. 13C NMR (100 MHz, CDCl3) δ = 168.0, 142.2 (d, *J C-P* = 2.0 Hz), 137.6 (d, *J C-P* = 6.6 Hz), 133.2 (d, *J C-P* = 3.1 Hz), 132.0, 131.4 (d, *J C-P* = 10.4 Hz), 131.2, 130.5, 129.1, 129.0, 128.4 (d, *J C-P* = 177.6 Hz), 126.8, 99.7 (d, *J C-P* = 10.5 Hz), 66.2 (d, *J C-P* = 5.6 Hz), 51.3 ppm. 31P NMR (160 MHz, CDCl3) δ = 18.5 ppm. IR (in KBr): ν = 2963, 2907, 2840, 1730, 1717, 1699 , 1542, 1506, 1456, 1433, 1260, 1198, 1132, 1086, 1069, 1022, 799, 750, 698, 670, 550, 517 cm-1. MS (EI) m/z (%) = 89.1(100), 90.1(53), 158.1(23), 237.0(18), 379.0(12). HRMS (ESI) (m/z)[ C17H17BrNO4P + H+]: Calcd. 410.0151, Found. 410.0163.

*(****Z****)-P*-3-Bromophenylmethoxy-*P-*phenyl-*N*-(methyl acrylate) phosphonamide **(5ja’):** Gummy liquid. Yield: 28% (57.3 mg). 1H NMR (400 MHz, CDCl3) δ = 9.08 (t, *J* = 13.4 Hz, NH), 7.79 (dd, *J* = 13.7, 7.6 Hz, 2H), 7.58 (t, *J* = 7.3 Hz, 1H), 7.53-7.45 (m, 4H), 7.32 (d, *J* = 7.6 Hz, 1H), 7.24 (t, *J* = 7.8 Hz, 1H), 7.06-6.98 (m, 1H), 5.15 - 5.06 (m, 2H), 5.01 (d, *J* = 8.4 Hz, 1H), 3.69 (s, 3H) ppm. 13C NMR (100 MHz, CDCl3) δ = 170.2, 144.1 (d, *J C-P* = 3.0 Hz), 137.9 (d, *J C-P* = 7.1 Hz), 133.0 (d, *J C-P* = 3.1 Hz), 131.8, 131.3 (d, *J C-P* = 10.4 Hz), 131.1, 130.4, 128.9 (d, *J C-P* = 15.2 Hz), 128.89 (d, *J C-P* = 177.7 Hz),126.7, 122.8, 93.8 (d, *J C-P* = 8.7 Hz), 66.1 (d, *J C-P* = 5.7 Hz), 51.1 ppm. 31P NMR (160 MHz, CDCl3) δ = 17.8 ppm. HRMS (ESI) (m/z)[ C17H17BrNO4P + H+]: Calcd. 410.0151, Found. 410.0168.

*(****E****)-P*-4-Bromophenylmethoxy-*P-*phenyl-*N*-(methyl acrylate) phosphonamide **(5la):** Gummy liquid. Yield: 38% (77.7 mg). 1H NMR (400 MHz, CDCl3) δ = 7.75 (dd, *J* = 13.5, 7.5 Hz, 2H), 7.57 (t, *J* = 7.2 Hz, 1H), 7.50 - 7.42 (m, 4H), 7.36 - 7.28 (m, 1H), 7.25 (d, *J* = 7.4 Hz, 3H), 5.28 (d, *J* = 13.4 Hz, 1H), 5.15 - 4.99 (m, 2H), 3.65 (s, 3H) ppm. 13C NMR (100 MHz, CDCl3) δ = 168.1, 142.3 (d, *J C-P* = 1.8 Hz), 133.2 (d, *J C-P* = 3.0 Hz), 132.0, 131.4 (d, *J C-P* = 10.4 Hz), 130.0, 129.0 (d, *J C-P* = 15.1 Hz), 128.4 (d, *J C-P* = 177.5 Hz), 123.0, 99.6 (d, *J* = 10.5 Hz), 66.4 (d, *J C-P* = 5.8 Hz), 51.3 ppm. 31P NMR (160 MHz, CDCl3) δ = 18.5 ppm. IR (in KBr): ν = 2963, 2911, 1717, 1651, 1506, 1456, 1260, 1177, 1090, 1069, 1022, 1013, 855, 799, 669, 557 cm-1. MS (EI) m/z (%) = 158.1(32), 169.0(100), 171.0(96), 350.0(18). HRMS (ESI) (m/z) [C17H17BrNO4P + H+]: Calcd. 410.0151, Found. 410.0159.

*(****Z****)-P*-4-Bromophenylmethoxy-*P-*phenyl-*N*-(methyl acrylate) phosphonamide **(5la’):** Gummy liquid. Yield: 28% (57.3 mg). 1H NMR (400 MHz, CDCl3) δ = 9.04 (t, *J* = 13.4 Hz, NH), 7.77 (dd, *J* = 13.7, 7.5 Hz, 2H), 7.56 (t, *J* = 7.2 Hz, 1H), 7.51 - 7.42 (m, 4H), 7.25 (d, *J* = 7.6 Hz, 2H), 7.07 - 6.92 (m, 1H), 5.14 - 5.02 (m, 2H), 4.99 (d, *J* = 8.6 Hz, 1H), 3.67 (s, 3H) ppm. 13C NMR (100 MHz, CDCl3) δ = 170.1, 144.2 (d, *J C-P* = 2.8 Hz), 134.7 (d, *J C-P* = 6.7 Hz), 133.0 (d, *J C-P* = 3.0 Hz), 132.0, 131.2 (d, *J C-P* = 10.4 Hz), 129.9, 128.9 (d, *J C-P* = 15.1 Hz), 128.9 (d, *J C-P* = 179.0 Hz), 122.8, 93.7 (d, *J C-P* = 8.7 Hz), 66.3 (d, *J C-P* = 5.7 Hz), 51.1 ppm. 31P NMR (160 MHz, CDCl3) δ =17.7 ppm. HRMS (ESI) (m/z) [C17H17BrNO4P + H+]: Calcd. 410.0151, Found. 410.0162.

*(****E****)-P*-n-Butoxy-*P-*phenyl-*N*-(methyl acrylate) phosphonamide **(5ma):** Gummy liquid. Yield: 30% (45.6 mg). 1H NMR (400 MHz, CDCl3) δ = 7.75 (dd, *J* = 13.5, 7.2 Hz, 2H), 7.55 (t, *J* = 7.1 Hz, 1H), 7.47 - 7.43 (m, 2H), 7.40 - 7.36 (m, 1H), 7.35 - 7.25 (m, 1H), 5.31 (d, *J* = 12.8 Hz, 1H), 4.17 - 4.04 (m, 2H), 3.64 (s, 3H), 1.75 - 1.67 (m, 2H), 1.45 - 1.39 (m, 2H), 0.93 (t, *J* = 7.3 Hz, 3H) ppm. 13C NMR (100 MHz, CDCl3) δ = 168.3, 142.9, 132.8 (d, *J C-P* = 3.0 Hz), 131.3 (d, *J C-P* = 10.2 Hz), 129.0 (d, *J C-P* = 177.8 Hz), 128.9 (d, *J C-P* = 15.0 Hz), 99.1 (d, *J C-P* = 10.5 Hz), 65.5 (d, *J C-P* = 6.2 Hz), 51.2, 32.4 (d, *J C-P* = 6.5 Hz), 18.9, 13.7 ppm. 31P NMR (160 MHz, CDCl3) δ = 17.6 ppm. IR (in KBr): ν = 2963, 2903, 2875, 1717, 1506, 1437, 1258, 1188, 1135, 1051, 1024, 974, 890, 797, 750, 698, 557 cm-1. MS (EI) m/z (%) = 101.1(63), 141.1(98), 210.1(100), 241.1(62), 297.1(46). HRMS (ESI) (m/z)[ C14H20NO4P + H+]: Calcd. 298.1203, Found. 298.1208.

*(****Z****)-P*-*n*-Butoxy-*P-*phenyl-*N*-( methyl acrylate) phosphonamide **(5ma’):** Gummy liquid. Yield: 45% (66.8 mg). 1H NMR (400 MHz, CDCl3) δ = 8.99 (t, *J* = 13.2 Hz, NH), 7.77 (dd, *J* = 13.5, 7.5 Hz, 2H), 7.54 (t, *J* = 7.2 Hz, 1H), 7.48 - 7.42 (m, 2H), 7.06 - 6.98 (m, 1H), 4.98 (d, *J* = 8.4 Hz, 1H), 4.15 - 4.06 (m, 2H), 3.67 (s, 3H), 1.74 - 1.66 (m, 2H), 1.46 - 1.38 (m, 2H), 0.92 (t, *J* = 7.3 Hz, 3H) ppm. 13C NMR (100 MHz, CDCl3) δ = 170.2, 144.6 (d, *J C-P* = 3.0 Hz), 132.7 (d, *J C-P* = 3.1 Hz), 131.2 (d, *J C-P* = 10.2 Hz), 129.6 (d, *J C-P* = 177.6 Hz), 128.8 (d, *J C-P* = 14.9 Hz), 93.2 (d, *J C-P* = 8.7 Hz), 65.5 (d, *J C-P* = 6.2 Hz), 51.0, 32.4 (d, *J C-P* = 6.6 Hz), 18.9, 13.7 ppm. 31P NMR (160 MHz, CDCl3) δ = 16.6 ppm. HRMS (ESI) (m/z) [C14H20NO4P + H+]: Calcd. 298.1203, Found. 298.1205.

*(****E****)-P*-cyclohexylmethoxy-*P-*phenyl-*N*-(methyl acrylate) phosphonamide **(5na):** Gummy liquid. Yield: 37% (62.3 mg). 1H NMR (400 MHz, CDCl3) δ = 7.75 (dd, *J* = 13.4, 7.5 Hz, 2H), 7.54 (t, *J* = 7.2 Hz, 1H), 7.52 - 7.42 (m, 3H), 7.37 - 7.28 (m, 1H), 5.31 (d, *J* = 13.5 Hz, 1H), 3.98 - 3.92 (m, 1H), 3.85 - 3.80 (m, 1H), 3.64 (s, 3H), 1.73 (dd, *J* = 28.2, 12.7 Hz, 6H), 1.28 - 1.15 (m, 3H), 0.99 (t, *J* = 11.8 Hz, 2H) ppm. 13C NMR (100 MHz, CDCl3) δ = 168.4, 142.9 (d, *J C-P* = 1.9 Hz), 132.8 (d, *J C-P* = 2.9 Hz), 131.3 (d, *J C-P* = 10.2 Hz), 129.0 (d, *J C-P* = 177.9 Hz), 128.9 (d, *J C-P* = 15.0 Hz), 99.1 (d, *J C-P* = 10.4 Hz), 70.5 (d, *J C-P* = 6.6 Hz), 51.2, 38.4 (d, *J C-P* = 6.7 Hz), 29.40, 29.38, 26.4, 25.6 ppm. 31P NMR (160 MHz, CDCl3) δ = 17.6 ppm. IR (in KBr): ν = 2928, 2855, 1732, 1717, 1699, 1458, 1437, 1258, 1136, 1052, 1038, 1024, 824, 802, 747, 698, 555 cm-1. MS (EI) m/z (%) = 101.1(62), 141.1(32), 210.1(100), 242.1(76), 337.2(10). HRMS (ESI) (m/z) [C17H24NO4P + H+]: Calcd. 338.1516, Found. 338.1526.

*(****Z****)-P*-cyclohexylmethoxy-*P-*phenyl-*N*-( methyl acrylate) phosphonamide **(5na’):** Gummy liquid. Yield: 41% yield (69.1mg). 1H NMR (400 MHz, CDCl3) δ = 8.97 (t, *J* = 13.3 Hz, NH), 7.76 (dd, *J* = 13.4, 7.5 Hz, 2H), 7.54 (t, *J* = 7.2 Hz, 1H), 7.48 - 7.43 (m, 2H), 7.06 - 6.97 (m, 1H), 4.98 (d, *J* = 8.4 Hz, 1H), 3.93 - 3.82 (m, 2H), 3.67 (s, 3H), 1.79 - 1.65 (m, 6H), 1.28 - 1.15 (m, 3H), 1.02 - 0.92 (m, 2H) ppm. 13C NMR (100 MHz, CDCl3) δ = 170.2, 144.7 (d, *J C-P* = 3.0 Hz), 132.7 (d, *J C-P* = 3.1 Hz), 131.2 (d, *J C-P* = 10.2 Hz), 129.5 (d, *J C-P* = 178.0 Hz), 128.8 (d, *J C-P* = 14.8 Hz), 93.2 (d, *J C-P* = 8.6 Hz), 70.5 (d, *J C-P* = 6.6 Hz), 51.0, 38.4 (d, *J C-P* = 6.7 Hz), 29.4, 29.3, 26.4, 25.6 ppm. 31P NMR (160 MHz, CDCl3)  = 16.5 ppm. HRMS (ESI) (m/z)[ C17H24NO4P + H+]: Calcd. 338.1516, Found. 338.1522.

*(****E****)-P*-1-Methoxyethoxy-*P-*phenyl-*N*-(methyl acrylate) phosphonamide **(5oa):** Gummy liquid. Yield: 30% yield (44.8 mg). 1H NMR (400 MHz, CDCl3) δ = 7.79 (dd, *J* = 13.2, 7.4 Hz, 2H), 7.57 (t, *J* = 6.9 Hz, 1H), 7.50 - 7.39 (m, 3H), 7.28 - 7.19 (m, 1H), 5.30 (d, *J* = 13.3 Hz, 1H), 4.26 (d, *J* = 42.4 Hz, 2H), 3.65 (s, 5H), 3.40 (s, 3H) ppm. 13C NMR (100 MHz, CDCl3) δ = 168.2, 143.1 (d, *J C-P* = 1.9 Hz), 132.9 (d, *J C-P* = 2.8 Hz), 131.4 (d, *J C-P* = 10.3 Hz), 128.84 (d, *J C-P* = 15.1 Hz), 128.83 (d, *J C-P* = 179.6 Hz), 99.1 (d, *J C-P* = 10.8 Hz), 71.5 (d, *J C-P* = 5.8 Hz), 64.5 (d, *J C-P* = 6.4 Hz), 59.1, 51.2 ppm. 31P NMR (160 MHz, CDCl3)  = 17.9 ppm. IR (in KBr): ν = 2964, 2893, 2837, 1732, 1717, 1682, 1506, 1456, 1258, 1195, 1136, 1094, 1043, 1024, 950, 797, 750, 698, 667, 555 cm-1. MS (EI) m/z (%) = 155.1(52), 199.1(79), 210.1(45), 242.1(100), 299.1(7). HRMS (ESI) (m/z)[ C13H18NO5P + H+]: Calcd. 300.0995, Found. 300.0998.

*(****Z****)-P*-1-Methoxyethoxy-*P-*phenyl-*N*-(methyl acrylate) phosphonamide **(5oa’):** Gummy liquid. Yield: 41% yield (61.3 mg). 1H NMR (400 MHz, CDCl3) δ = 9.06 (t, *J* = 13.1 Hz, NH), 7.79 (dd, *J* = 13.6, 7.5 Hz, 2H), 7.55 (t, *J* = 7.2 Hz, 1H), 7.49 - 7.43 (m, 2H), 7.05 - 6.96 (m, 1H), 4.99 (d, *J* = 8.5 Hz, 1H), 4.25 (d, *J* = 33.3 Hz, 2H), 3.67 (s, 3H), 3.63 (s, 2H), 3.39 (s, 3H) ppm. 13C NMR (100 MHz, CDCl3) δ = 170.0, 144.4 (d, *J C-P* = 3.0 Hz), 132.8 (d, *J C-P* = 3.0 Hz), 131.3 (d, *J C-P* = 10.4 Hz), 129.3(d, *J C-P* = 15.2 Hz), 128.8 (d, *J C-P* = 178.4 Hz), 93.5 (d, *C-P* = 8.8 Hz), 71.4 (d, *J C-P* = 6.1 Hz), 64.6 (d, *J C-P* = 6.2 Hz), 59.1 (s), 51.0 (s) ppm. 31P NMR (160 MHz, CDCl3) δ = 17.7 ppm. HRMS (ESI) (m/z)[ C13H18NO5P + H+]: Calcd. 300.0995, Found. 300.0996.

*(E)-P*-p-tolyl-*P-*phenyl-*N*-(methyl acrylate) phosphonamide **(5pa):** Gummy liquid. Yield: 42% (69.5 mg). 1H NMR (400 MHz, CDCl3) δ = 7.84 (dd, *J* = 13.7, 7.6 Hz, 2H), 7.58 (t, *J* = 7.3 Hz, 1H), 7.51 - 7.46 (m, 2H), 7.40 (t, *J* = 11.4 Hz, 2H), 7.08 (s, 4H), 5.29 (d, *J* = 11.9 Hz, 1H), 3.64 (s, 3H), 2.29 (s, 3H) ppm. 13C NMR (100 MHz, CDCl3) δ =168.2, 147.5 (d, *J* *C-P* = 8.5 Hz), 142.3 (d, *J C-P* = 2.3 Hz), 135.2, 133.2 (d, *J C-P* = 3.0 Hz), 131.6 (d, *J C-P* = 10.5 Hz), 130.5, 129.0 (d, *J C-P* = 15.2 Hz), 128.3 (d, *J C-P* = 178.9 Hz), 120.5 (d, *J C-P* = 4.5 Hz), 99.9 (d, *J C-P* = 11.1 Hz), 51.2, 20.9 ppm. 31P NMR (160 MHz, CDCl3) δ = 15.3 ppm. IR (in KBr): ν = 3204, 2963, 2907, 1732, 1506, 1456, 1261, 1206, 1139, 1094, 1055, 1017, 900, 800, 750, 726, 698, 548 cm-1. MS (EI) m/z (%) = 141.0(52), 210.0(80), 238.0(100), 331.1(2). HRMS (ESI) (m/z)[ C17H18NO4P + H+]: Calcd. 332.1046, Found. 332.1047.

*(****Z****)-P*-p-tolyl-*P-*phenyl-*N*-(methyl acrylate) phosphonamide **(5pa’):** gummy liquid. Yield: 28% yield (46.3 mg). 1H NMR (400 MHz, CDCl3) δ = 9.27 (t, *J* = 13.6 Hz, NH), 7.88 (dd, *J* = 13.8, 7.5 Hz, 2H), 7.59 (t, *J* = 7.2 Hz, 1H), 7.52 - 7.45 (m, 2H), 7.10 (s, 4H), 7.06 - 7.00 (m, 1H), 5.01 (d, *J* = 8.4 Hz, 1H), 3.68 (s, 3H), 2.29 (s, 3H) ppm. 13C NMR (100 MHz, CDCl3) δ = 170.2, 147.7 (d, *J C-P* = 8.4 Hz), 144.0 (d, *J C-P* = 2.8 Hz), 135.1 (d, *J C-P* = 0.9 Hz), 133.1 (d, *J C-P* = 3.0 Hz), 131.4 (d, *J* *C-P* = 10.5 Hz), 130.4, 128.9 (d, *J* *C-P* = 15.3 Hz), 128.8 (d, *J C-P* = 179.0 Hz), 127.97, 120.5 (d, *J C-P* = 4.5 Hz), 93.9 (d, *J C-P* = 9.0 Hz), 51.1, 20.9 ppm. 31P NMR (160 MHz, CDCl3) δ = 14.3 ppm. HRMS (ESI) (m/z)[ C17H18NO4P + H+]: Calcd. 332.1046, Found. 332.1053.

*(****E****)-P*,*P-Di*phenyl-*N*-(methyl acrylate) phosphonamide **(5qa):** Gummy liquid. Yield: 29% (43.6 mg). 1H NMR (400 MHz, CDCl3) δ = 7.80 - 7.74 (m, 4H), 7.58 - 7.53 (m, 2H), 7.50 - 7.45 (m, 4H), 7.36 - 7.28 (m, 1H), 6.90 - 6.81 (m, 1H), 5.36 (d, *J* = 13.4 Hz, 1H), 3.60 (s, 3H) ppm. 13C NMR (100 MHz, CDCl3) δ = 170.4, 144.4, 132.86 (d, *J C-P* = 2.5 Hz), 131.8 (d, *J C-P* = 10.3 Hz), 130.9 (d, *J C-P* = 127.9 Hz), 129.0 (d, *J C-P* = 13.1 Hz), 94.2 (d, *J C-P* = 8.0 Hz), 51.1 ppm. 31P NMR (160 MHz, CDCl3) δ = 22.4 ppm. IR (in KBr): ν = 3057, 3030, 3009, 2963, 2906, 1733, 1717, 1699, 1558, 1541, 1509, 1457, 1437, 1260, 1195, 1128, 1087, 1018, 953, 865, 799, 753, 726, 696, 670, 552 cm-1. MS (EI) m/z (%) = 201.1(100), 202.1(70), 301.1(55). HRMS (ESI) (m/z)[ C16H16NO3P + H+]: Calcd. 302.0941, Found. 302.0945.

*(****Z****)-P*,*P-Di*phenyl-*N*-(methyl acrylate) phosphonamide **(5qa’):** Gummy liquid. Yield: 29% (43.6 mg). 1H NMR (400 MHz, CDCl3) δ = 9.42 (t, *J* = 12.6 Hz, NH), 7.80 (dd, *J* = 11.9, 7.9 Hz, 4H), 7.59 - 7.54 (m, 2H), 7.52 - 7.46 (m, 4H), 6.94 - 6.85 (m, 1H), 5.05 (d, *J* = 8.3 Hz, 1H), 3.69 (s, 3H) ppm. 13C NMR (100 MHz, CDCl3) δ = 170.4, 144.3, 132.9 (d, *J* = 2.7 Hz), 131.8 (d, *J C-P* = 10.4 Hz), 130.9 (d, *J C-P* = 127.9 Hz), 129.0 (d, *J C-P* = 13.2 Hz), 94.2 (d, *J C-P* = 8.0 Hz), 51.1 ppm. 31P NMR (160 MHz, CDCl3) δ = 22.5 ppm. HRMS (ESI) (m/z)[ C16H16NO3P + H+]: Calcd. 302.0941, Found. 302.0949.

*(****E****)-P*-ethoxy-*P-*phenyl-*N*-( ethyl acrylate) phosphonamide **(5ab):** Gummy liquid. Yield: 34% (48.1 mg). 1H NMR (400 MHz, CDCl3) δ = 7.76 (dd, *J* = 13.5, 7.4 Hz, 2H), 7.55 (t, *J* = 7.2 Hz, 1H), 7.48 - 7.42 (m, 2H), 7.35 (t, *J* = 9.3 Hz, 2H), 5.35 - 5.26 (m, 1H), 4.26 - 4.14 (m, 2H), 4.12 - 4.06 (m, 2H), 1.39 (t, *J* = 7.0 Hz, 3H), 1.22 (t, *J* = 7.1 Hz, 3H) ppm. 13C NMR (100 MHz, CDCl3) δ = 167.9, 142.6 (d, *J C-P* = 2.0 Hz), 132.8 (d, *J C-P* = 2.9 Hz), 131.3 (d, *JC-P* = 10.3 Hz), 129.0 (d, *J C-P* = 177.7 Hz), 128.9 (d, *J C-P* = 15.0 Hz), 99.6 (d, *J C-P* = 10.5 Hz), 61.9 (d, *J C-P* = 6.2 Hz), 59.9, 16.4 (d, *J C-P* = 6.4 Hz), 14.5 ppm. 31P NMR (160 MHz, CDCl3) δ = 17.6 ppm. IR (in KBr): ν = 2984, 2965, 2905, 2873, 2838, 1732, 1717, 1696, 1678, 1539, 1506, 1454, 1418, 1261, 1196, 1182, 1135, 1093, 1049, 946, 866, 799, 746, 696, 548 cm-1. MS (EI) m/z (%) = 77.1(49), 141.0(100), 170.1(33), 210.1(42), 283.1(51). HRMS (ESI) (m/z)[ C13H18NO4P + H+]: Calcd. 284.1046, Found. 284.1055.

*(****Z****)-P*-ethoxy-*P-*phenyl-*N*-(ethyl acrylate) phosphonamide **(5ab’):** Gummy liquid. Yield: 51% (72.2 mg). 1H NMR (400 MHz, CDCl3) δ = 9.04 (t, *J* = 13.0 Hz, NH), 7.77 (dd, *J* = 13.6, 7.4 Hz, 2H), 7.54 (t, *J* = 7.1 Hz, 1H), 7.49 - 7.42 (m, 2H), 7.06 - 6.97 (m, 1H), 4.97 (d, *J* = 8.4 Hz, 1H), 4.21 - 4.09 (m, 4H), 1.37 (t, *J* = 7.0 Hz, 3H), 1.25 (t, *J* = 7.0 Hz, 3H) ppm. 13C NMR (100 MHz, CDCl3) δ = 169.9, 144.4 (d, *J C-P* = 3.0 Hz), 132.7 (d, *J C-P* = 3.0 Hz), 131.2 (d, *J C-P* = 10.3 Hz), 129.6 (d, *J C-P* = 177.4 Hz), 128.8 (d, *J C-P* = 14.8 Hz), 93.6 (d, *J C-P* = 8.5 Hz), 61.9 (d, *J C-P* = 6.0 Hz), 59.8, 16.4 (d, *J C-P* = 6.7 Hz), 14.4 ppm. 31P NMR (160 MHz, CDCl3) δ = 16.7 ppm. HRMS (ESI) (m/z)[ C13H18NO4P + H+]: Calcd. 284.1046, Found. 284.1059.

*(****E****)-P*-ethoxy-*P-*phenyl-*N*-(2-ethylhexyl acrylate) phosphonamide **(5ac):** Gummy liquid. Yield: 27% (49.5 mg). 1H NMR (400 MHz, CDCl3) δ = 7.76 (dd, *J* = 12.3, 7.5 Hz, 2H), 7.55 (t, *J* = 7.2 Hz, 1H), 7.45 (s, 3H), 7.38 - 7.29 (m, 1H), 5.32 (d, *J* = 13.2 Hz, 1H), 4.25 - 4.13 (m, 2H), 3.96 (s, 2H), 1.56 - 1.51 (m, 1H), 1.39 (t, *J* = 6.5 Hz, 3H), 1.36 - 1.29 (m, 3H), 1.25 (s, 4H), 0.90 - 0.83 (d, *J* = 7.2 Hz, 7H) ppm. 13C NMR (100 MHz, CDCl3) δ = 168.2, 142.5, 132.8, 131.3 (d, *J C-P* = 10.0 Hz), 129.1 (d, *J C-P* = 176.1 Hz), 128.9 (d, *J C-P* = 14.8 Hz), 99.7 (d, *J C-P* = 10.2 Hz), 66.4, 61.9 (d, *J C-P* = 5.5 Hz), 38.9, 30.6, 29.0, 23.9, 23.1, 16.4 (d, *J C-P* = 6.3 Hz), 14.2, 11.1 ppm. 31P NMR (160 MHz, CDCl3) δ = 17.7 ppm. IR (in KBr): ν = 2963, 2929, 2911, 2873, 2862, 1731, 1717, 1697, 1541, 1508, 1452, 1418, 1260, 1184, 1086, 1020, 866, 799, 747, 669 cm-1. MS (EI) m/z (%) = 141.0(75), 170.1(22), 210.0(70), 238.1(55), 256.1(100), 367.2(7). HRMS (ESI) (m/z) [C19H30NO4P + H+]: Calcd. 368.1985, Found. 368.1988.

*(****Z****)-P*-ethoxy-*P-*phenyl-*N*-(2-ethylhexyl acrylate) phosphonamide **(5ac’):** Gummy liquid. Yield: 51% (93.6 mg). 1H NMR (400 MHz, CDCl3) δ = 9.04 (t, *J* = 13.4 Hz, NH), 7.78 (dd, *J* = 13.6, 7.5 Hz, 2H), 7.54 (t, *J* = 7.3 Hz, 1H), 7.48 - 7.43 (m, 2H), 7.05 - 6.97 (m, 1H), 4.99 (d, *J* = 8.4 Hz, 1H), 4.22 - 4.14 (m, 2H), 3.98 (d, *J* = 2.8 Hz, 2H), 1.59 - 1.53 (m, 1H), 1.37 (t, *J* = 7.0 Hz, 4H), 1.33 (d, *J* - 7.2 Hz, 2H), 1.27 (s, 4H), 0.87 (t, *J* = 6.9 Hz, 7H) ppm. 13C NMR (100 MHz, CDCl3) δ = 170.1, 144.3 (d, *J C-P* = 3.0 Hz), 132.7 (d, *J C-P* = 3.0 Hz), 131.2 (d, *J C-P* = 10.2 Hz), 129.6 (d, *J C-P* = 176.1 Hz), 128.8 (d, *J C-P* = 15.0 Hz), 93.8 (d, *J C-P* = 8.6 Hz), 66.3, 61.9 (d, *J C-P* = 6.0 Hz), 38.9, 30.5, 29.0, 23.9, 23.1, 16.4 (d, *J C-P* = 6.5 Hz), 14.1, 11.1 ppm. 31P NMR (160 MHz, CDCl3) δ = 16.7 ppm. HRMS (ESI) (m/z)[ C19H30NO4P + H+]: Calcd. 368.1985, Found. 368.1986.

*(****E****)-P*-ethoxy-*P-*phenyl-*N*-(2-phenoxyethyl acrylate) phosphonamide **(5ad):** Gummy liquid. Yield: 24% (45.0 mg). 1H NMR (400 MHz, CDCl3) δ = 7.76 (dd, *J* = 13.4, 7.6 Hz, 2H), 7.55 (t, *J* = 7.2 Hz, 1H), 7.49 - 7.42 (m, 3H), 7.41 - 7.34 (m, 1H), 7.28 (t, *J* = 7.4 Hz, 2H), 6.96 (t, *J* = 7.2 Hz, 1H), 6.90 (d, *J* = 7.9 Hz, 2H), 5.37 (d, *J* = 12.8 Hz, 1H), 4.42 (s, 2H), 4.27 - 4.17 (m, 2H), 4.16 - 4.13 (m, 2H), 1.39 (t, *J* = 6.9 Hz, 3H) ppm. 13C NMR (100 MHz, CDCl3) δ = 167.8, 158.6, 143.4 (d, *J C-P* = 1.2 Hz), 132.9 (d, *J C-P* = 2.9 Hz), 131.3 (d, *J C-P* = 10.3 Hz), 129.6, 128.9 (d, *J C-P* = 177.7 Hz), 128.9 (d, *J C-P* = 15.0 Hz), 121.2, 114.7, 98.9 (d, *J C-P* = 10.5 Hz), 66.2, 62.3, 62.0 (d, *J C-P* = 6.0 Hz), 16.4 (d, *J C-P* = 6.4 Hz) ppm. 31P NMR (160 MHz, CDCl3) δ = 17.6 ppm. IR (in KBr): ν = 2965, 2902, 2881, 1717, 1684, 1541, 1523, 1508, 1456, 1396, 1260, 1130, 1038, 799, 749, 693, 669, 550 cm-1. MS (EI) m/z (%) = 141.0(28), 210.0(20), 255.1(10), 282.1(100), 325.1(6), 375.1(2). HRMS (ESI) (m/z)[ C19H22NO5P + H+]: Calcd. 376.1308, Found. 376.1318.

*(****Z****)-P*-ethoxy-*P-*phenyl-*N*-(2-phenoxyethyl acrylate) phosphonamide **(5ad’):** Gummy liquid. Yield: 38% (71.2 mg). 1H NMR (400 MHz, CDCl3) δ = 8.98 (t, *J* = 13.4 Hz, NH), 7.79 (dd, *J* = 13.6, 7.5 Hz, 2H), 7.56 (t, *J* = 7.3 Hz, 1H), 7.49 - 7.44 (m, 2H), 7.28 (t, *J* = 7.5 Hz, 2H), 7.09 - 7.02 (m, 1H), 6.96 (t, *J* = 7.3 Hz, 1H), 6.90 (d, *J* = 8.0 Hz, 2H), 5.05 (d, *J* = 8.4 Hz, 1H), 4.44 (d, *J* = 4.4 Hz, 2H), 4.23 - 4.15 (m, 4H), 1.39 (t, *J* = 7.0 Hz, 3H) ppm. 13C NMR (100 MHz, CDCl3) δ = 169.5, 158.5, 145.0 (d, *J C-P* = 3.0 Hz), 132.8 (d, *J C-P* = 3.0 Hz), 131.2 (d, *J C-P* = 10.3 Hz), 129.6, 129.4 (d, *J C-P* = 177.6 Hz), 128.8 (d, *J* *C-P* = 15.0 Hz), 121.2, 114.7, 93.2 (d, *J C-P* = 8.7 Hz), 65.9, 62.2, 61.9 (d, *J C-P* = 6.0 Hz), 16.4 (d, *J C-P* = 6.5 Hz) ppm. 31P NMR (160 MHz, CDCl3) δ = 16.7 ppm. HRMS (ESI) (m/z)[ C19H22NO5P + H+]: Calcd. 376.1308, Found. 376.1315.

*(****E****)-P*-ethoxy-*P-*phenyl-*N*-(furan-2-ylmethyl acrylate) phosphonamide **(5ae)**: Gummy liquid. Yield: 27% (45.2 mg). 1H NMR (400 MHz, CDCl3) δ = 7.74 (dd, *J* = 13.5, 7.6 Hz, 2H), 7.54 (t, *J* = 7.3 Hz, 1H), 7.48 - 7.42 (m, 2H), 7.39 (s, 1H), 7.38 - 7.27 (d, *J* = 11.8 Hz, 2H), 6.36 (s, 1H), 6.33 (s, 1H), 5.32 (d, *J* = 12.5 Hz, 1H), 5.05 (s, 2H), 4.24 - 4.10 (m, 2H), 1.38 (t, *J* = 7.0 Hz, 3H) ppm. 13C NMR (100 MHz, CDCl3) δ = 167.5, 150.1, 143.4 (d, *J* = 1.7 Hz), 143.2, 132.9 (d, *J* = 2.9 Hz), 131.3 (d, *J* = 10.3 Hz), 128.92 (d, *J* = 177.6 Hz), 128.89 (d, *J* = 15.0 Hz), 110.6, 110.4, 98.9 (d, *J* = 10.5 Hz), 62.0 (d, *J* = 6.1 Hz), 57.6, 16.4 (d, *J* = 6.5 Hz) ppm. 31P NMR (160 MHz, CDCl3) δ = 17.5 ppm. IR (in KBr): ν = 2965, 2907, 1717, 1682, 1541, 1506, 1339, 1260, 1087, 1038, 1018, 865, 799, 750, 669 cm-1. MS (EI) m/z (%) = 81.0(100), 141.0(50), 238.0(40), 291.0(10), 335.0(11). HRMS (ESI) (m/z)[ C16H18NO5P + H+]: Calcd. 336.0995, Found. 336.0999.

*(****Z****)-P*-ethoxy-*P-*phenyl-*N*-(furan-2-ylmethyl acrylate) phosphonamide **(5ae’):** Gummy liquid. Yield: 41% (68.7 mg). 1H NMR (400 MHz, CDCl3) δ = 8.97 (t, *J* = 13.3 Hz, NH), 7.78 (dd, *J* = 13.6, 7.4 Hz, 2H), 7.55 (t, *J* = 7.2 Hz, 1H), 7.49 - 7.43 (m, 2H), 7.40 (s, 1H), 7.09 - 7.00 (m, 1H), 6.39 (s, 1H), 6.34 (s, 1H), 5.07 (s, 2H), 5.00 (d, *J* = 8.5 Hz, 1H), 4.23 - 4.14 (m, 2H), 1.38 (t, *J* = 7.0 Hz, 3H) ppm. 13C NMR (100 MHz, CDCl3) δ = 169.3, 149.7, 145.1 (d, *J* = 3.0 Hz), 143.4, 132.8 (d, *J* = 3.0 Hz), 131.2 (d, *J* = 10.3 Hz), 129.4 (d, *J* = 177.7 Hz), 128.8 (d, *J* = 15.0 Hz), 110.64, 110.61, 93.1 (d, *J* = 8.6 Hz), 62.0 (d, *J* = 6.0 Hz), 57.4, 16.4 (d, *J* = 6.5 Hz) ppm. 31P NMR (160 MHz, CDCl3) δ = 16.6 ppm. HRMS (ESI) (m/z)[ C16H18NO5P + H+]: Calcd. 336.0995, Found. 336.1001.

*(****E****)-P*-ethoxy-*P-*phenyl-*N*-(cinnamyl acrylate) phosphonamide **(5af):** Gummy liquid. Yield: 38% (70.5 mg). 1H NMR (400 MHz, CDCl3) δ = 7.77 (dd, *J* = 13.6, 7.5 Hz, 2H), 7.55 (t, *J* = 7.2 Hz, 1H), 7.50 - 7.43 (m, 3H), 7.42 - 7.34 (m, 3H), 7.30 (t, *J* = 7.3 Hz, 2H), 7.25 (t, *J* = 8.4 Hz, 1H), 6.61 (d, *J* = 15.9 Hz, 1H), 6.31 - 6.23 (m, 1H), 5.37 (d, *J* = 12.8 Hz, 1H), 4.73 (d, *J* = 6.2 Hz, 2H), 4.26 - 4.13 (m, 2H), 1.40 (t, *J* = 7.0 Hz, 3H) ppm. 13C NMR (100 MHz, CDCl3) δ = 167.7, 143.2 (d, *J* = 1.9 Hz), 136.4, 133.7, 132.9 (d, *J* = 2.9 Hz), 131.3 (d, *J* = 10.3 Hz), 129.0 (d, *J* = 178.0 Hz), 128.9 (d, *J* = 14.9 Hz), 128.7, 128.0, 126.7, 123.9, 99.2 (d, *J* = 10.5 Hz), 64.5, 62.0 (d, *J* = 6.0 Hz), 16.4 (d, *J* = 6.5 Hz) ppm. 31P NMR (160 MHz, CDCl3) δ = 17.6 ppm. IR (in KBr): ν = 2963, 2907, 1717, 1697, 1557, 1506, 1456 , 1261, 1181, 1177, 1094, 1034, 865, 799, 750, 694, 548 cm-1. MS (EI) m/z (%) = 115.1(43), 117.1(100), 141.0(69), 186.0(28), 238.0(60), 371.1(5). HRMS (ESI) (m/z)[ C20H22NO4P + H+]: Calcd. 372.1359, Found. 372.1367.

*(****Z****)-P*-ethoxy-*P-*phenyl-*N*-(cinnamyl acrylate) phosphonamide **(5af’):** Gummy liquid. Yield: 49% (90.9 mg). 1H NMR (400 MHz, CDCl3) δ = 9.04 (t, *J* = 13.4 Hz, NH), 7.79 (dd, *J* = 13.6, 7.6 Hz, 2H), 7.55 (t, *J* = 7.2 Hz, 1H), 7.40 - 7.43 (m, 2H), 7.38 (d, *J* = 7.4 Hz, 2H), 7.31 (t, *J* = 7.3 Hz, 2H), 7.26 - 7.21 (m, 1H), 7.11 - 7.01 (m, 1H), 6.64 (d, *J* = 15.9 Hz, 1H), 6.32 - 6.24 (m, 1H), 5.05 (d, *J* = 8.4 Hz, 1H), 4.75 (d, *J* = 6.3 Hz, 2H), 4.25 - 4.14 (m, 2H), 1.39 (t, *J* = 7.0 Hz, 3H) ppm. 13C NMR (100 MHz, CDCl3) δ = 169.5, 144.9 (d, *J* = 3.0 Hz), 136.3, 134.0, 132.7 (d, *J* = 3.0 Hz), 131.2 (d, *J* = 10.3 Hz), 129.4 (d, *J* = 177.4 Hz), 128.8 (d, *J* = 14.9 Hz), 128.7, 128.1, 126.7, 123.4, 93.3 (d, *J* = 8.7 Hz), 64.4, 61.9 (d, *J* = 6.0 Hz), 16.4 (d, *J* = 6.5 Hz) ppm. 31P NMR (160 MHz, CDCl3) δ = 16.7 ppm. HRMS (ESI) (m/z)[ C20H22NO4P + H+]: Calcd. 372.1359, Found. 372.1361.

*(****E****)-P*-ethoxy-*P-*phenyl-*N*-(allyl acrylate) phosphonamide **(5ag):** gummy liquid. Yield: 31% (45.7 mg). 1H NMR (400 MHz, CDCl3) δ = 7.77 (dd, *J* = 13.6, 7.6 Hz, 2H), 7.57 (t, *J* = 7.3 Hz, 1H), 7.50 - 7.44 (m, 2H), 7.43 - 7.33 (m, 1H), 6.91 (t, *J* = 11.3 Hz, 1H), 5.96 - 5.85 m, 1H), 5.32 (d, *J* = 13.7 Hz, 1H), 5.27 (d, *J* = 17.3 Hz, 1H), 5.19 (d, *J* = 10.4 Hz, 1H), 4.57 (d, *J* = 5.5 Hz, 2H), 4.26 - 4.13 (m, 2H), 1.40 (t, *J* = 7.1 Hz, 3H) ppm. 13C NMR (100 MHz, CDCl3) δ = 167.5, 142.9 (d, *J* = 2.2 Hz), 133.0 (d, *J* = 3.0 Hz), 132.8, 131.4 (d, *J* = 10.3 Hz), 129.0 (d, *J* = 177.6 Hz), 128.9 (d, *J* = 15.0 Hz), 117.9, 99.2 (d, *J* = 10.5 Hz), 64.7, 62.0 (d, *J* = 5.9 Hz), 16.4 (d, *J* = 6.7 Hz) ppm. 31P NMR (160 MHz, CDCl3) δ = 17.3 ppm. IR (in KBr): ν = 2965, 2906, 1717, 1657, 1552, 1506, 1456 , 1262, 1185, 1179, 1090, 1038, 855, 798, 750, 694, 549 cm-1. MS (EI) m/z (%) = 94.0(33), 141.0(45), 158.0(48), 208.0(22), 248.0(100). HRMS (ESI) (m/z)[ C14H18NO4P + H+]: Calcd. 296.1046, Found. 296.1059.

*(****Z****)-P*-ethoxy-*P-*phenyl-*N*-(allyl acrylate) phosphonamide **(5ag’):** Gummy liquid. Yield: 41% (60.5 mg). 1H NMR (400 MHz, CDCl3) δ = 9.00 (t, *J* = 13.3 Hz, NH), 7.78 (dd, *J* = 13.6, 7.6 Hz, 2H), 7.55 (t, *J* = 7.3 Hz, 1H), 7.50 - 7.43 (m, 2H), 7.09 - 6.99 (m, 1H), 5.98 - 5.86 (m, 1H), 5.31 (d, *J* = 17.2 Hz, 1H), 5.22 (d, *J* = 10.4 Hz, 1H), 5.02 (d, *J* = 8.4 Hz, 1H), 4.59 (d, *J* = 5.5 Hz, 2H), 4.24 - 4.14 (m, 2H), 1.38 (t, *J* = 7.0 Hz, 3H) (ppm). 13C NMR (100 MHz, CDCl3) δ = 169.5, 144.9 (d, *J* = 3.0 Hz), 132.8 (d, *J* = 3.1 Hz), 132.5, 131.2 (d, *J* = 10.3 Hz), 129.5 (d, *J* = 177.6 Hz), 128.8 (d, *J* = 15.0 Hz), 118.2, 93.3 (d, *J* = 8.6 Hz), 64.5, 62.0 (d, *J* = 6.2 Hz), 16.4 (d, *J* = 6.5 Hz) ppm. 31P NMR (160 MHz, CDCl3) δ = 16.7 ppm. HRMS (ESI) (m/z)[ C14H18NO4P + H+]: Calcd. 296.1046, Found. 296.1056.

*(****E****)-P*-ethoxy-*P-*phenyl-*N*-(phenyl acrylate) phosphonamide **(5ah):** Gummy liquid. Yield: 24% (39.7 mg). 1H NMR (400 MHz, CDCl3) δ = 7.80 (dd, *J* = 13.5, 7.7 Hz, 2H), 7.69 (t, *J* = 10.8 Hz, 1H), 7.61 - 7.52 (m, 2H), 7.51 - 7.46 (m, 2H), 7.34 (t, *J* = 7.4 Hz, 2H), 7.19 (t, *J* = 7.3 Hz, 1H), 7.06 (d, *J* = 7.8 Hz, 2H), 5.50 (d, *J* = 13.4 Hz, 1H), 4.29 - 4.17 (m, 2H), 1.42 (t, *J* = 6.9 Hz, 3H) ppm. 13C NMR (100 MHz, CDCl3) δ = 166.4, 151.0, 144.6 (d, *J* = 1.8 Hz), 133.0 (d, *J* = 2.8 Hz), 131.3 (d, *J* = 10.4 Hz), 129.4, 129.0 (d, *J* = 15.0 Hz), 128.8 (d, *J* = 177.9 Hz), 125.5, 121.9, 98.5 (d, *J* = 10.6 Hz), 62.2 (d, *J* = 6.3 Hz), 16.4 (d, *J* = 6.5 Hz) ppm. 31P NMR (160 MHz, CDCl3) δ = 17.6 ppm. IR (in KBr): ν = 2965, 2903, 1717, 1647, 1508, 1456, 1261, 1188, 1170, 1132, 1090, 1040, 1021, 799, 752, 694, 550 cm-1. MS (EI) m/z (%) = 155.0(32), 224.1(100), 300.1(4). HRMS (ESI) (m/z)[ C17H18NO4P + H+]: Calcd. 332.1046, Found. 332.1048.

*(****Z****)-P*-ethoxy-*P-*phenyl-*N*-(phenyl acrylate) phosphonamide **(5ah’):** Gummy liquid. Yield: 44% (72.8 mg). 1H NMR (400 MHz, CDCl3) δ = 9.00 (t, *J* = 13.2 Hz, NH), 7.78 (dd, *J* = 13.7, 7.5 Hz, 2H), 7.59 - 7.54 (m, 1H), 7.50 - 7.44 (m, 2H), 7.38 (t, *J* = 7.7 Hz, 2H), 7.23 (t, *J* = 7.4 Hz, 2H), 7.09 (d, *J* = 7.9 Hz, 2H), 5.24 (d, *J* = 8.4 Hz, 1H), 4.23 - 4.15 (m, 2H), 1.38 (t, *J* = 7.0 Hz, 3H) ppm. 13C NMR (100 MHz, CDCl3) δ = 168.6, 150.5, 146.9 (d, *J* = 3.3 Hz), 132.9 (d, *J* = 2.9 Hz), 131.2 (d, *J* = 10.3 Hz), 130.3 (d, *J* = 176.3 Hz), 129.5, 128.9 (d, *J* = 15.1 Hz), 125.9, 121.9, 92.4 (d, *J* = 8.5 Hz), 62.1 (d, *J* = 5.8 Hz), 16.4 (d, *J* = 6.7 Hz) ppm. 31P NMR (160 MHz, CDCl3) δ = 16.4 ppm. HRMS (ESI) (m/z)[ C17H18NO4P + H+]: Calcd. 332.1046, Found. 332.1059.

**Spectra:**

**1H, 13C and 31P -NMR spectra of 3aa/3aa'**

**
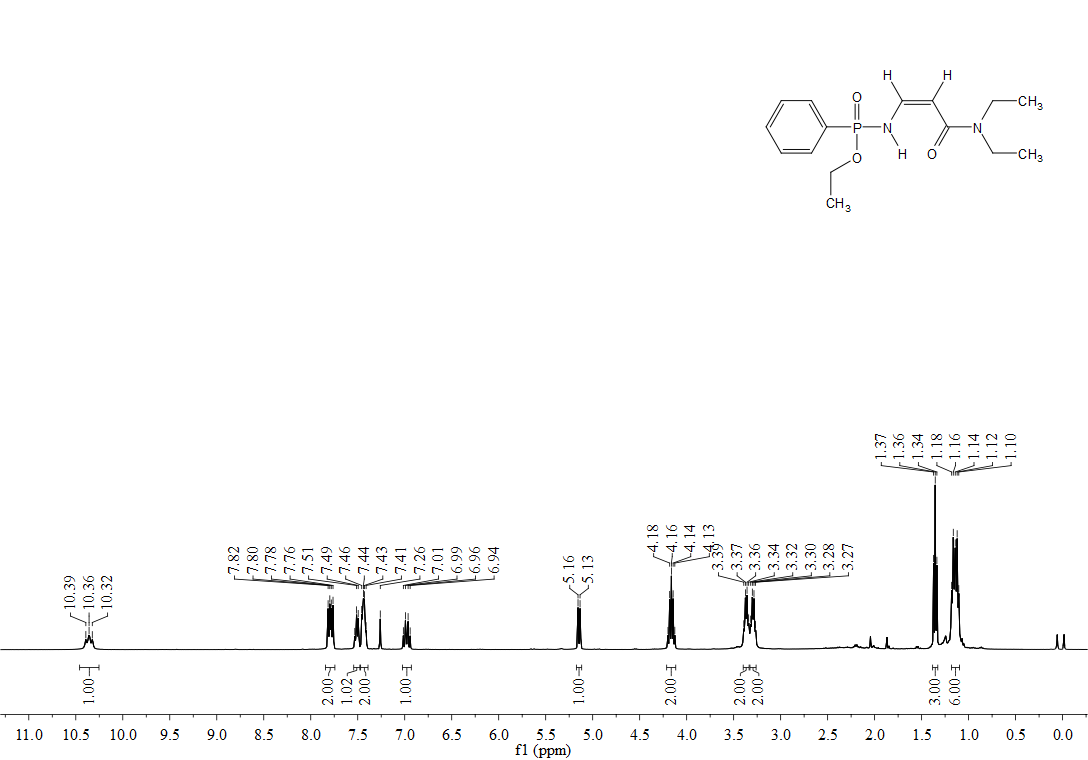
**

**
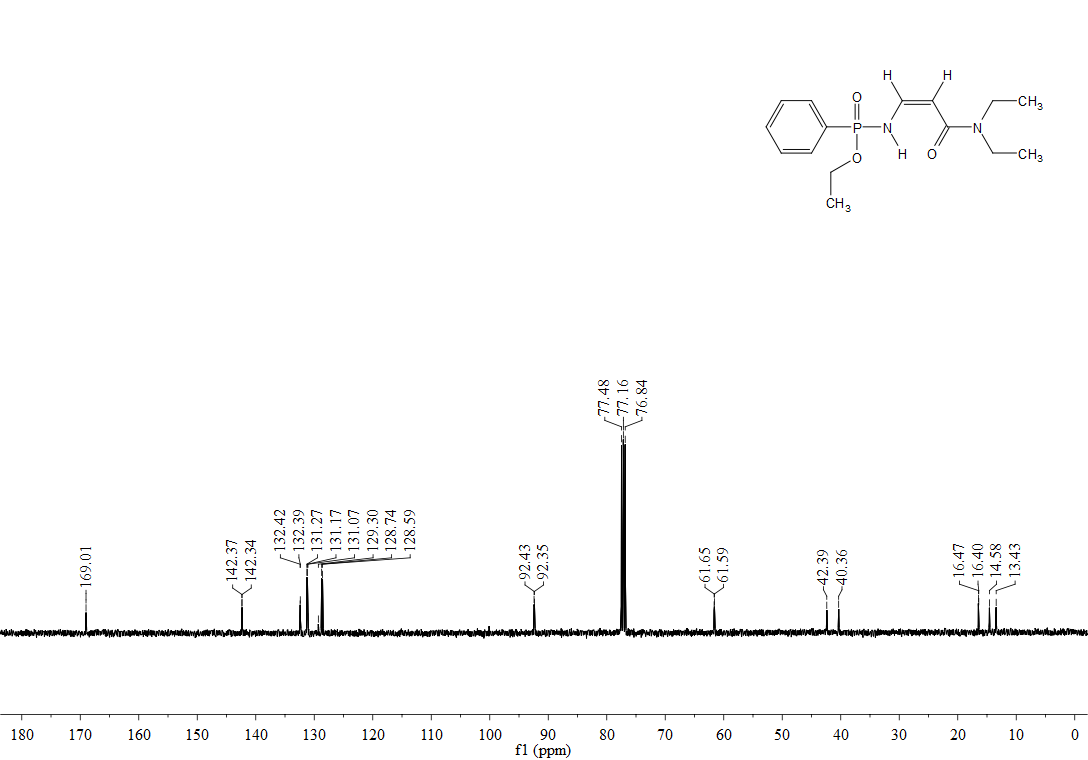
**

**
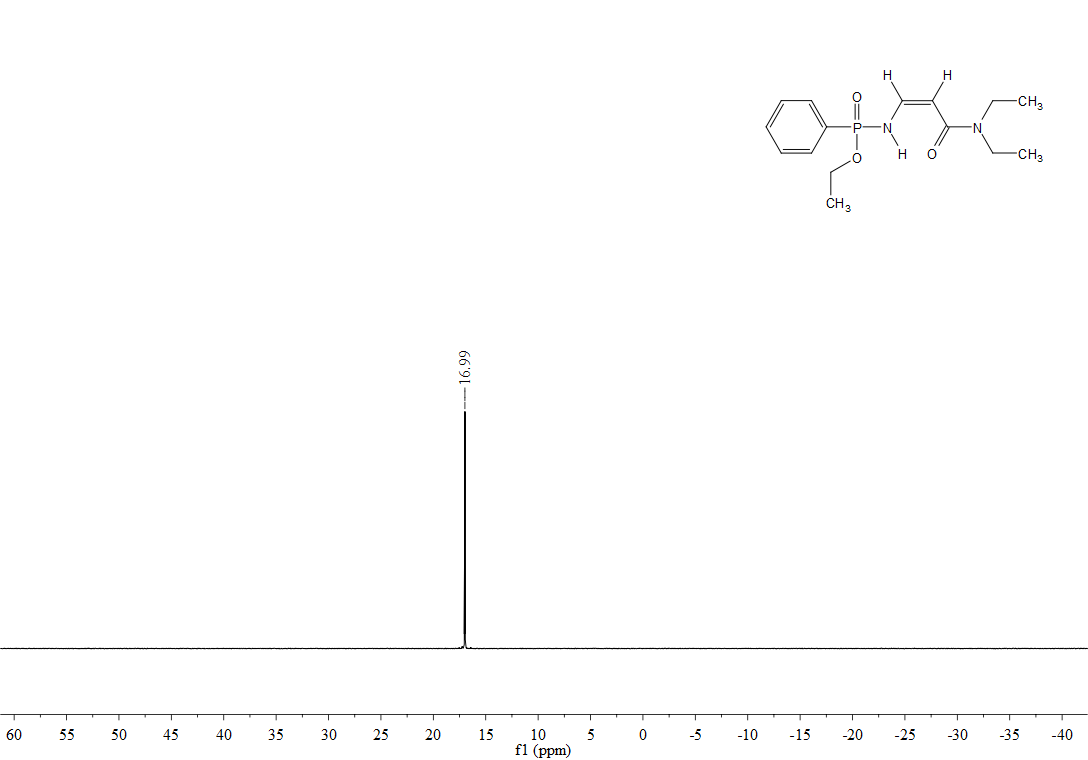
**

**1H, 13C and 31P -NMR spectra of 3ab + 3ab’**

**
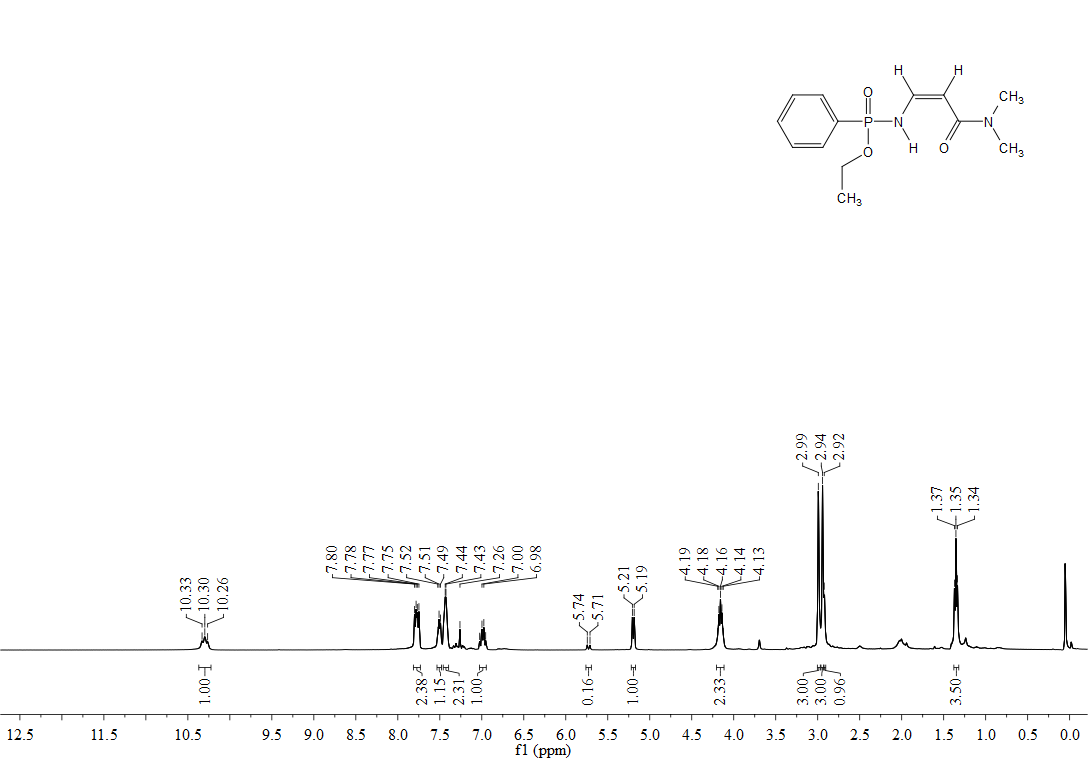
**

**
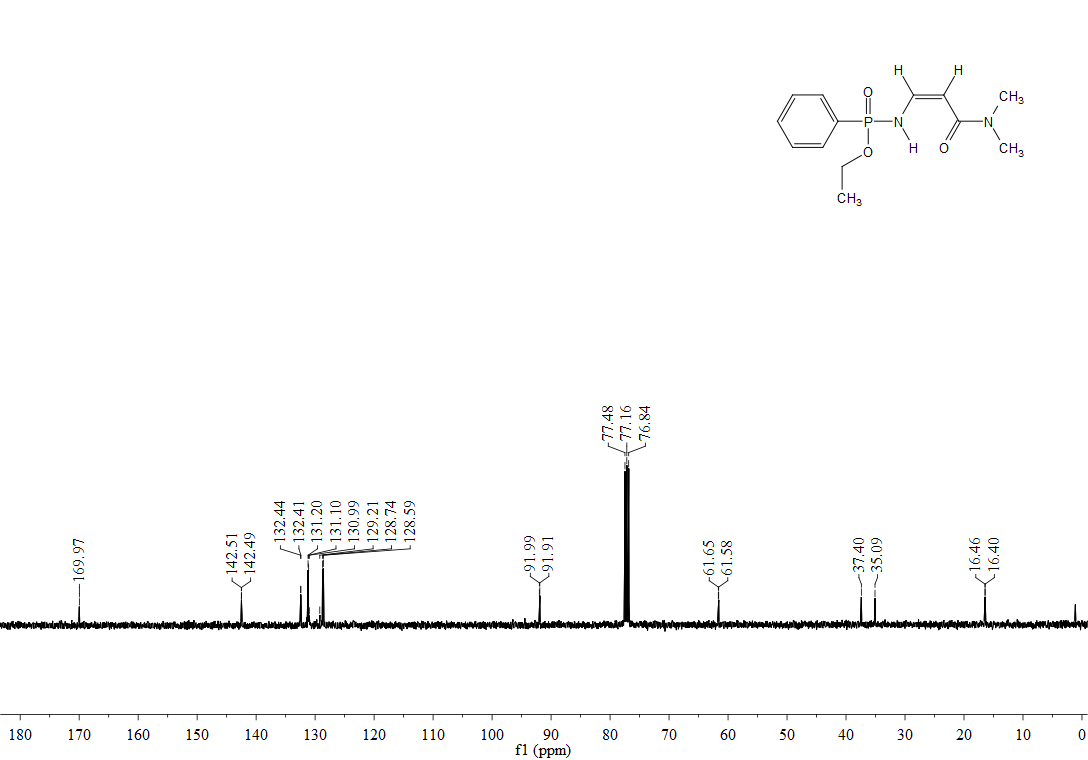
**

**
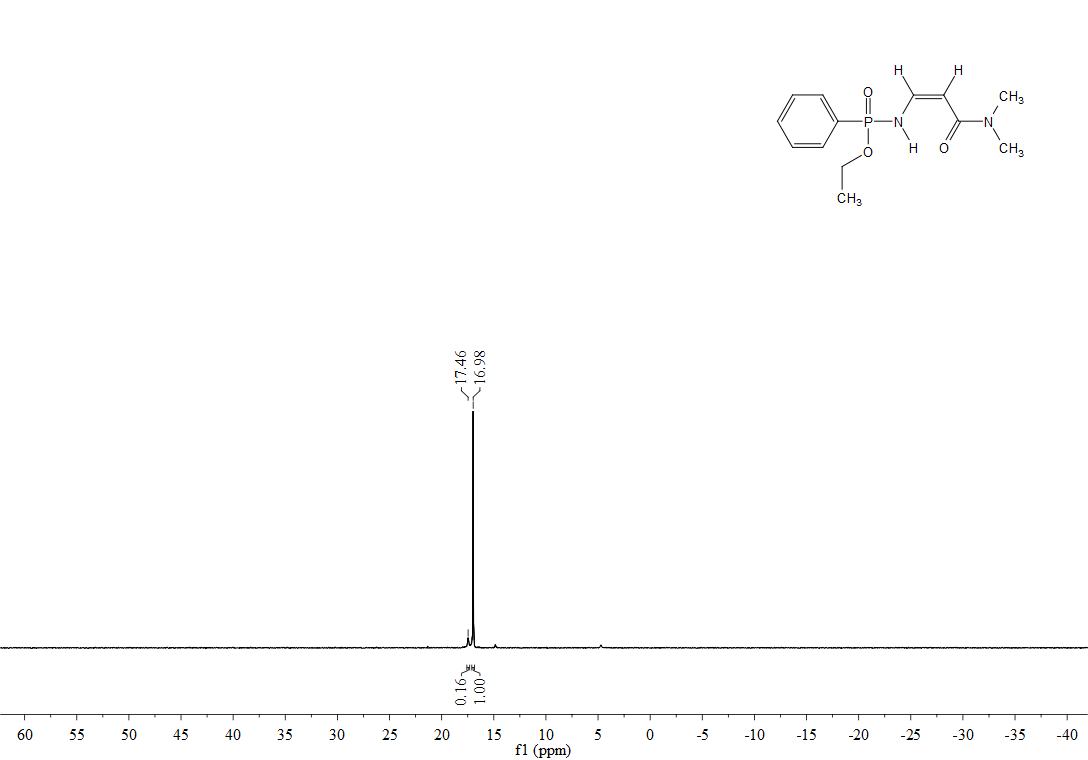
**

**1H, 13C and 31P -NMR spectra of 3ac/3ac'**

**
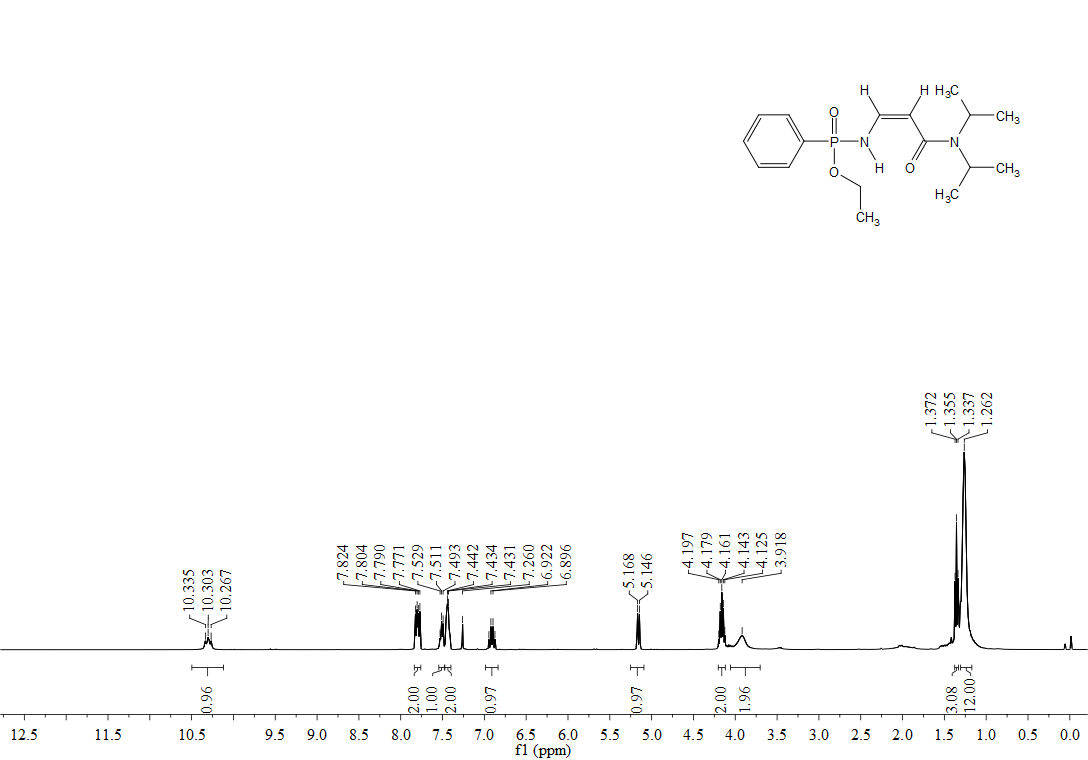
**

**
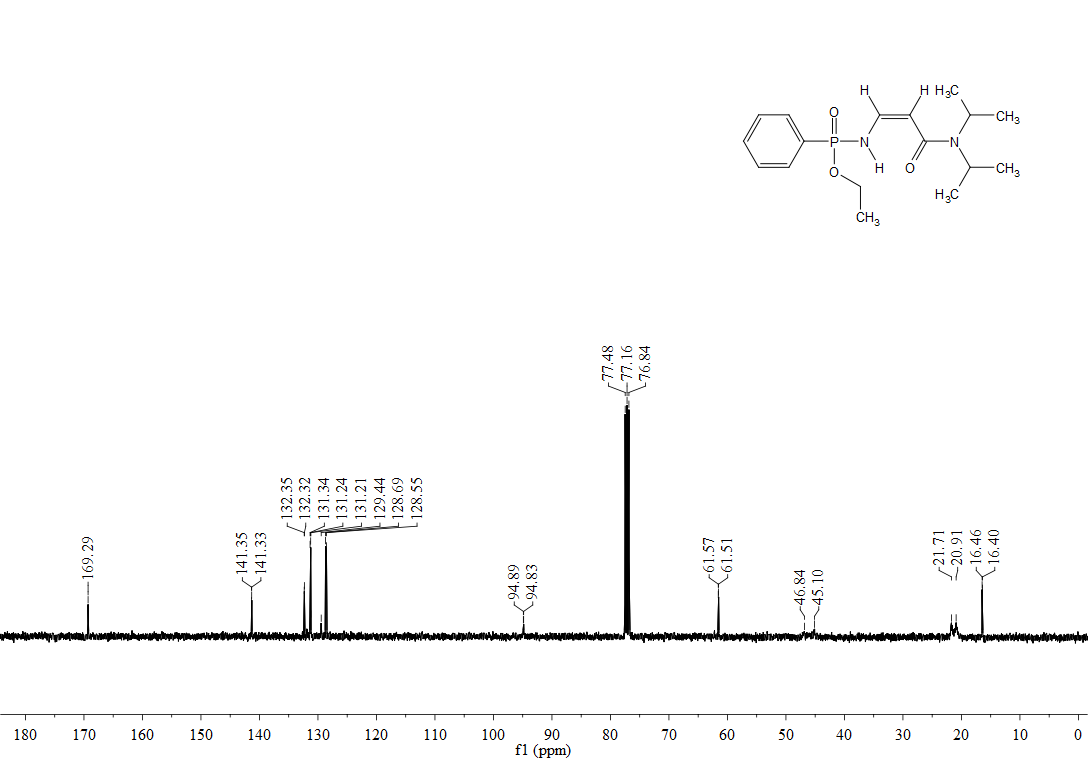
**

**
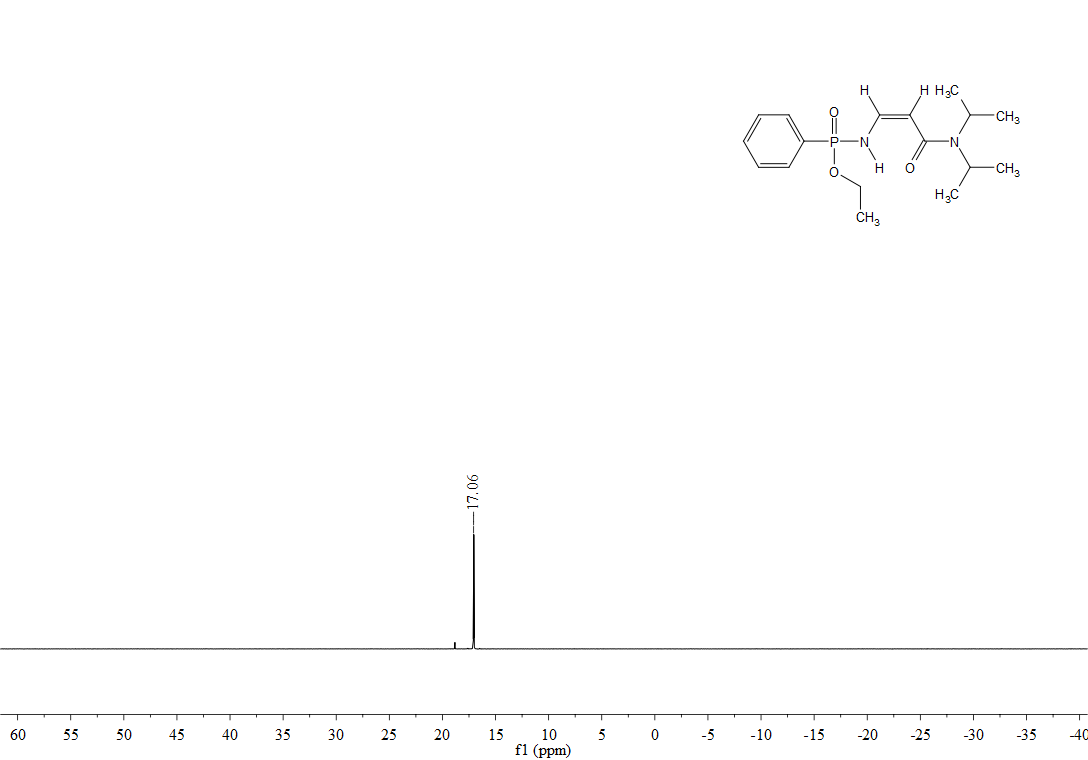
**

**1H, 13C and 31P -NMR spectra of 3ad/3ad'**

**
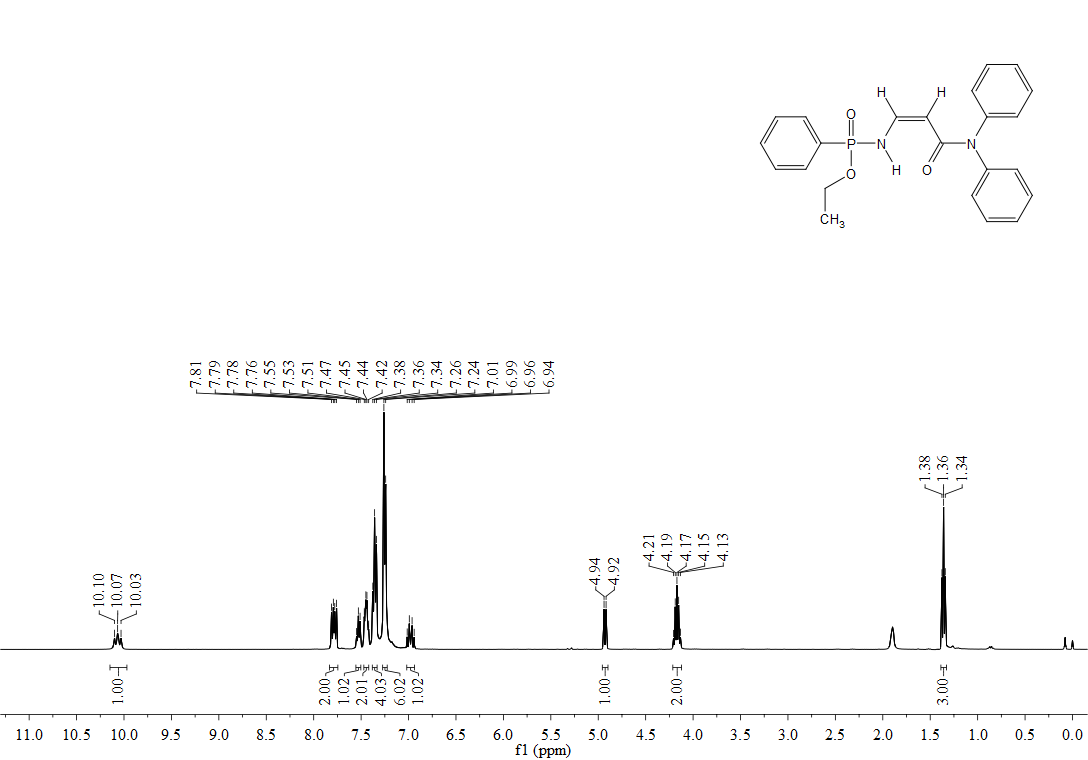
**

**
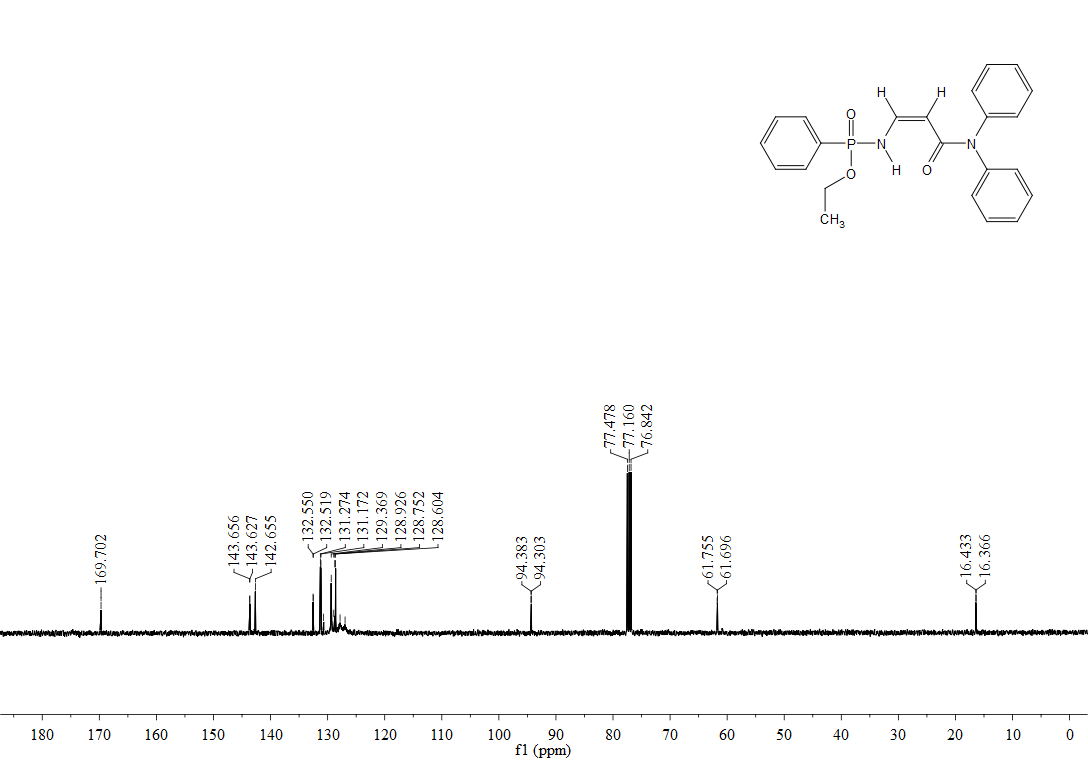
**

**
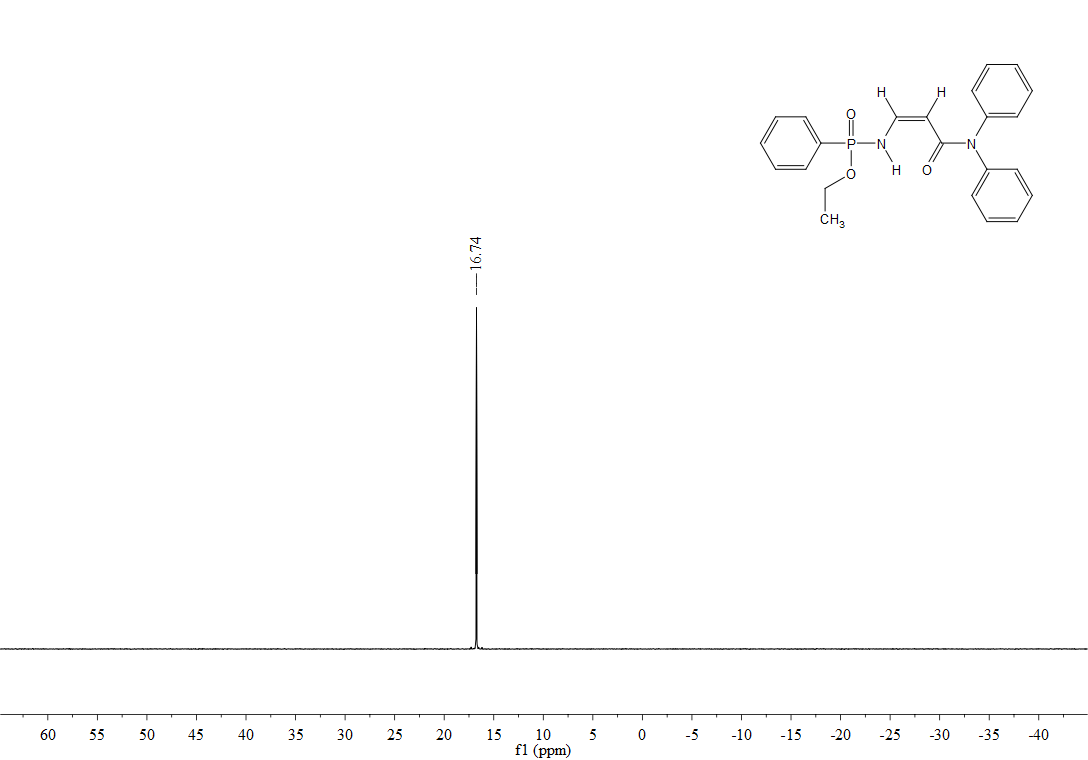
**

**1H, 13C and 31P -NMR spectra of 3ae/3ae'**

**
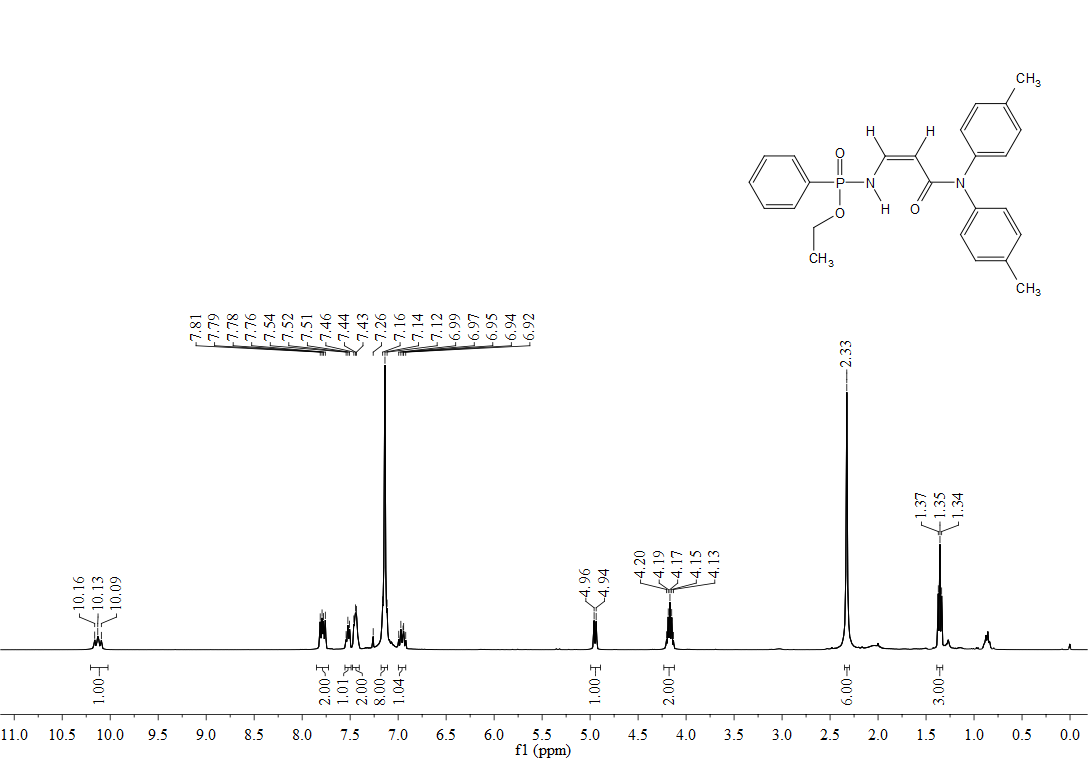
**

**
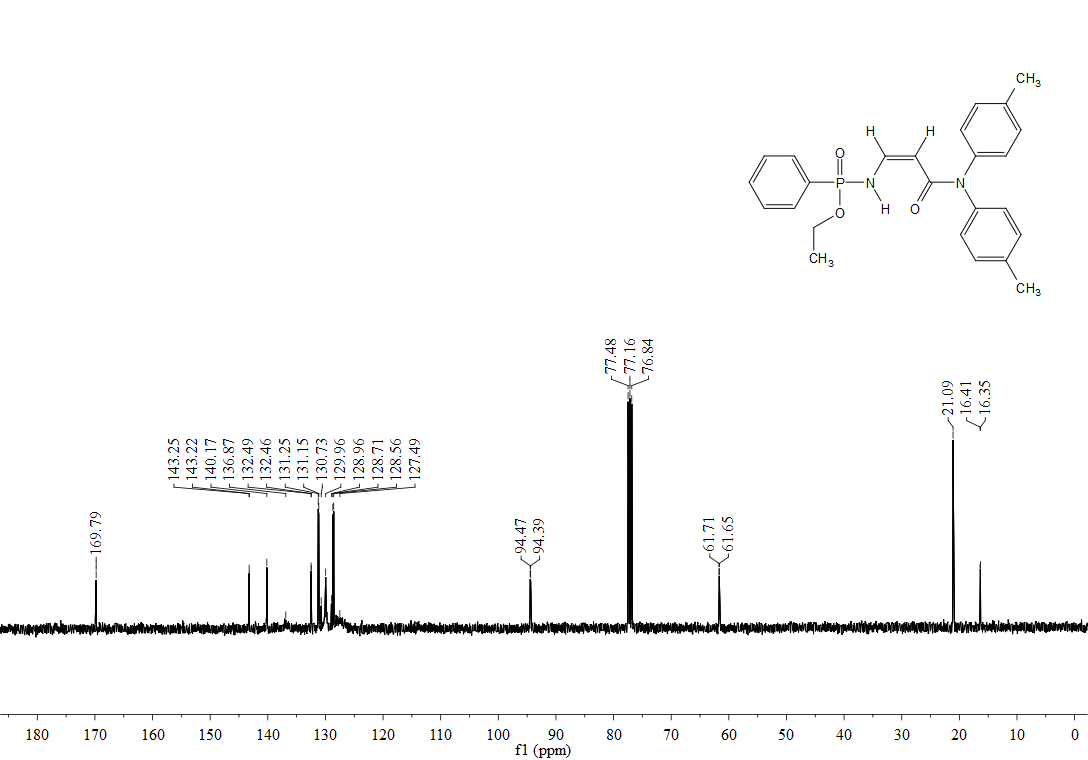
**

**
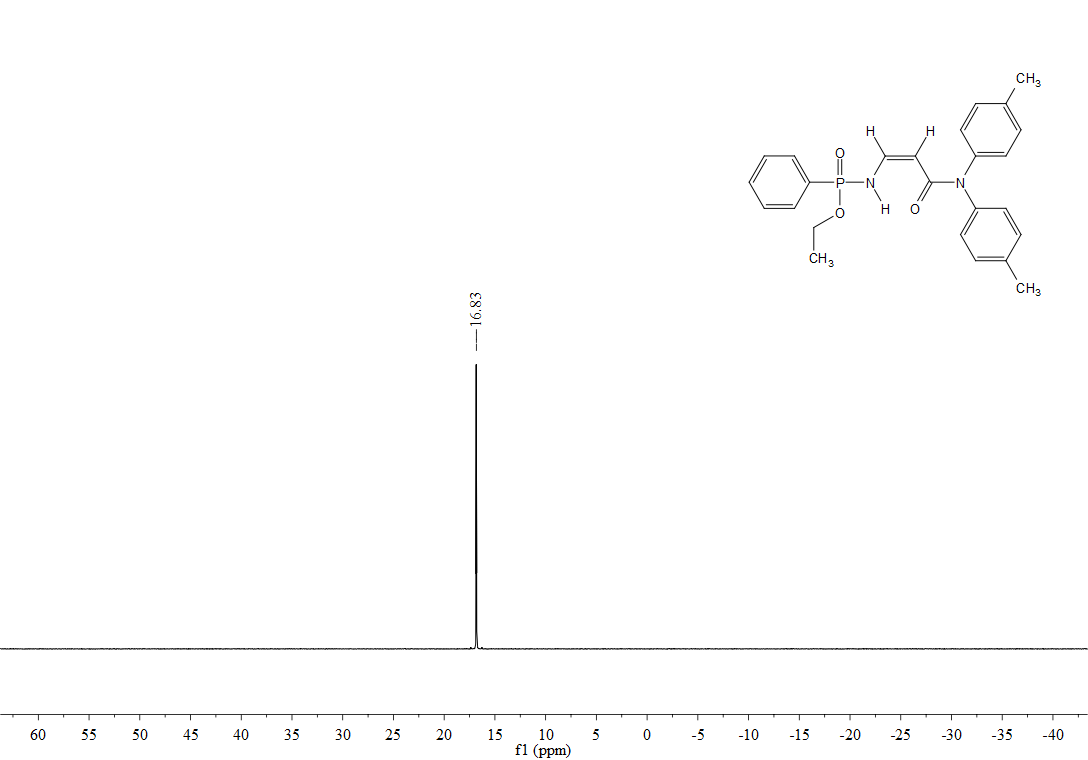
**

**1H, 13C and 31P -NMR spectra of 3af/3af'**

**
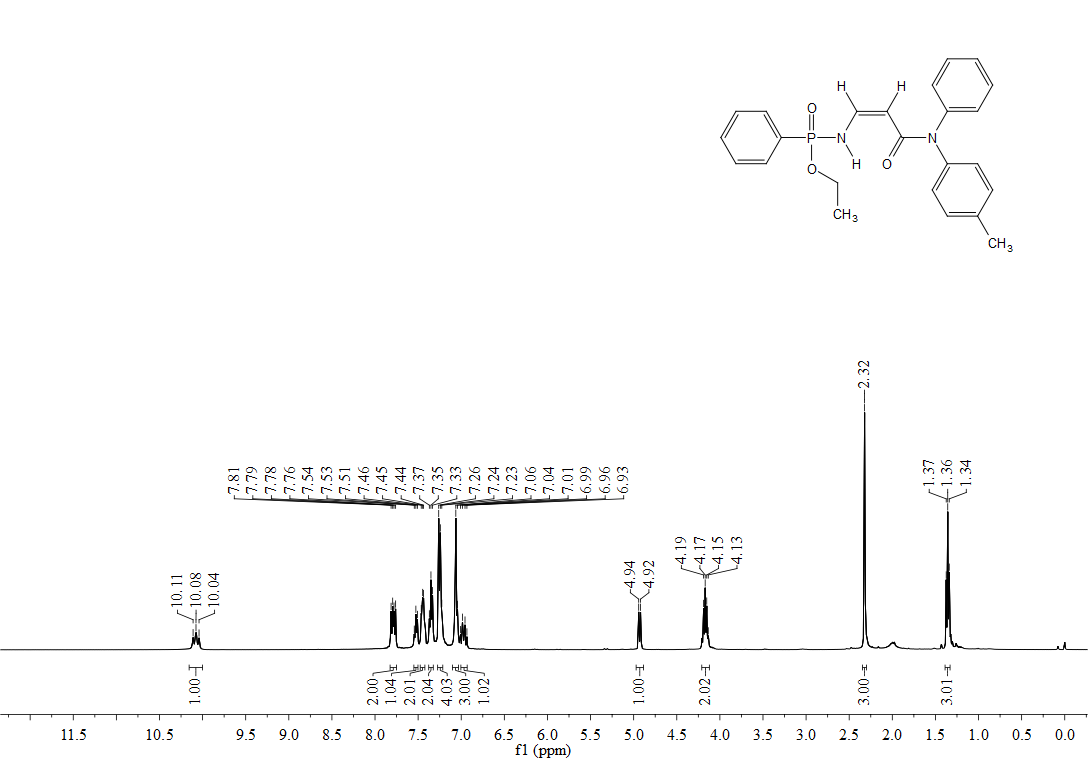
**

**
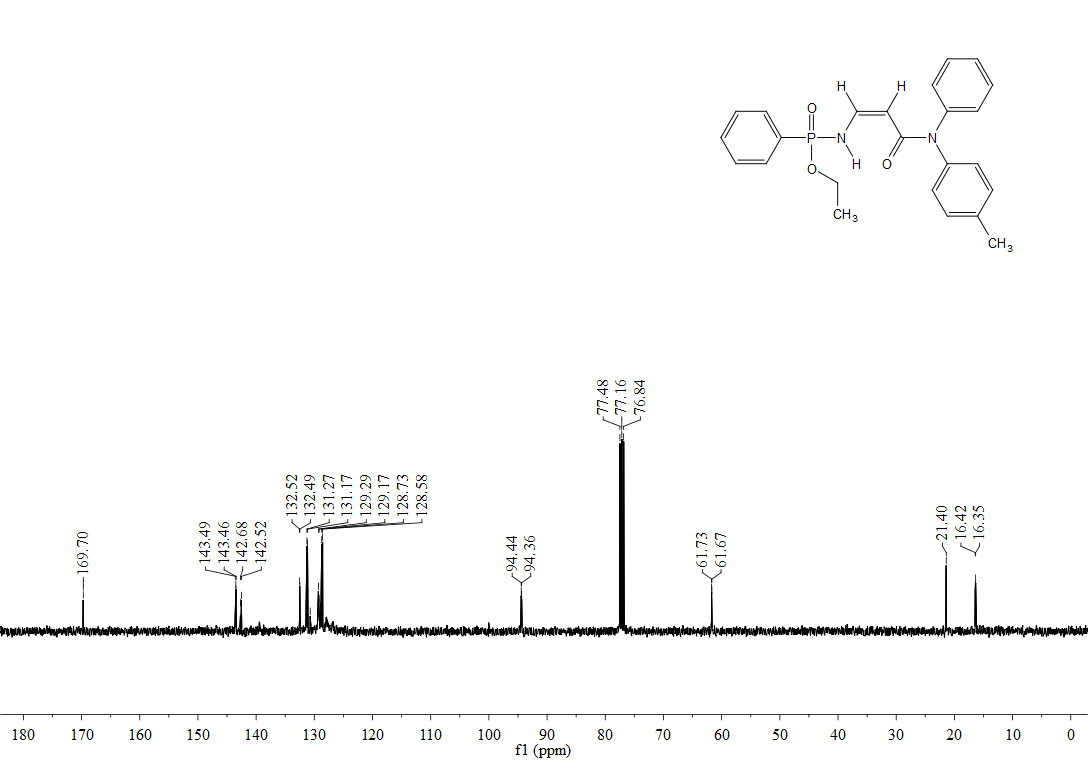
**

**
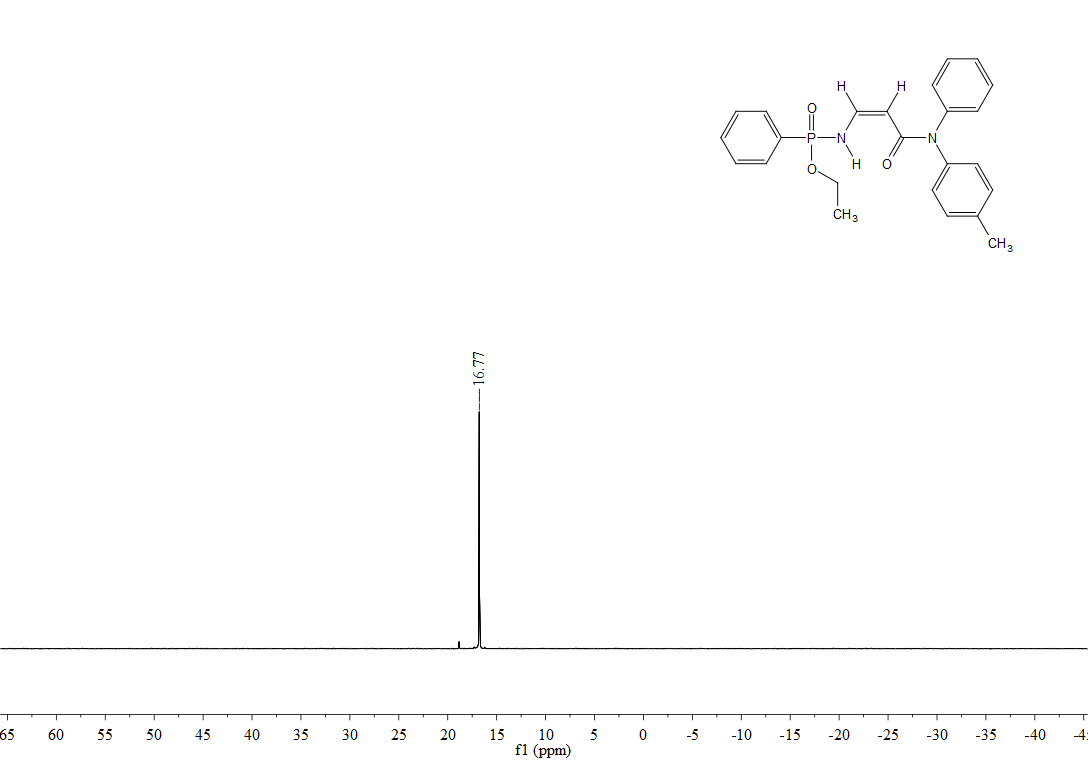
**

**1H, 13C and 31P -NMR spectra of 3ag/3ag'**

**
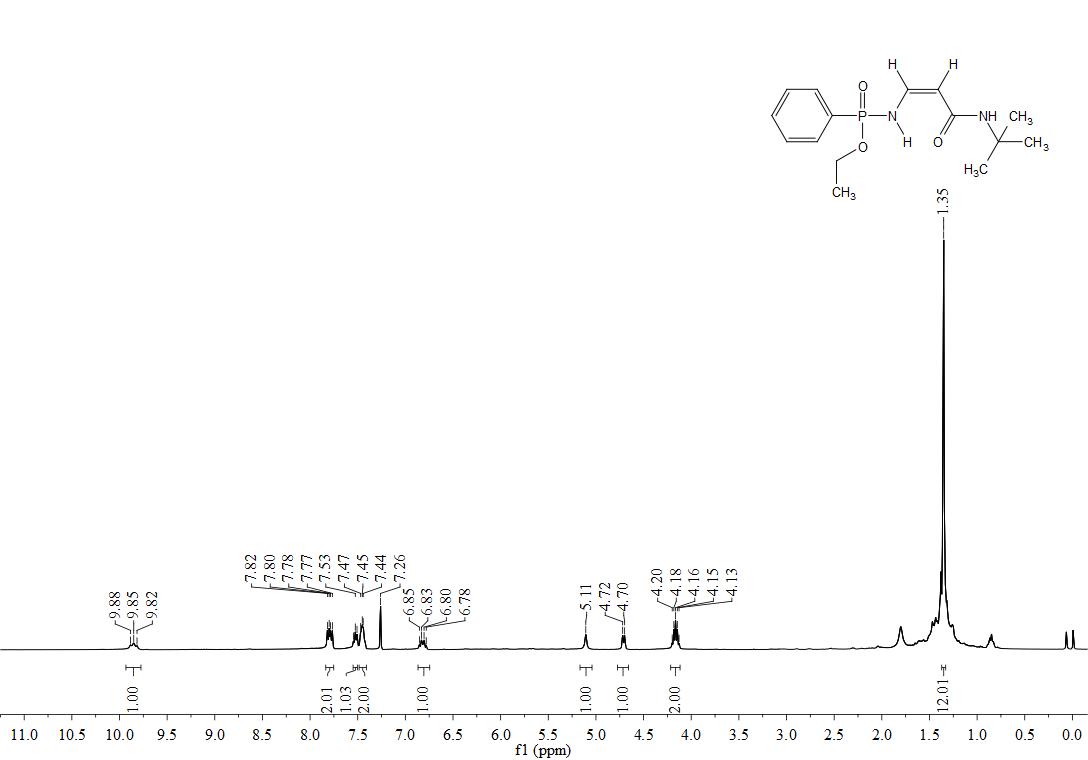
**

**
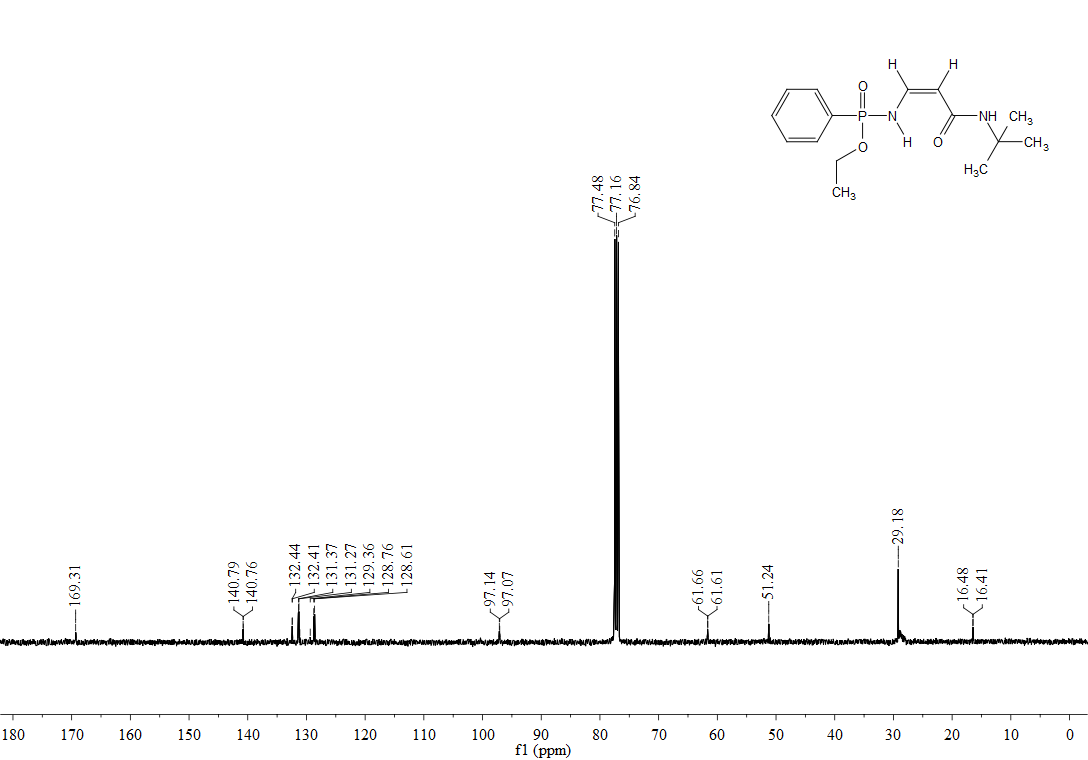
**

**
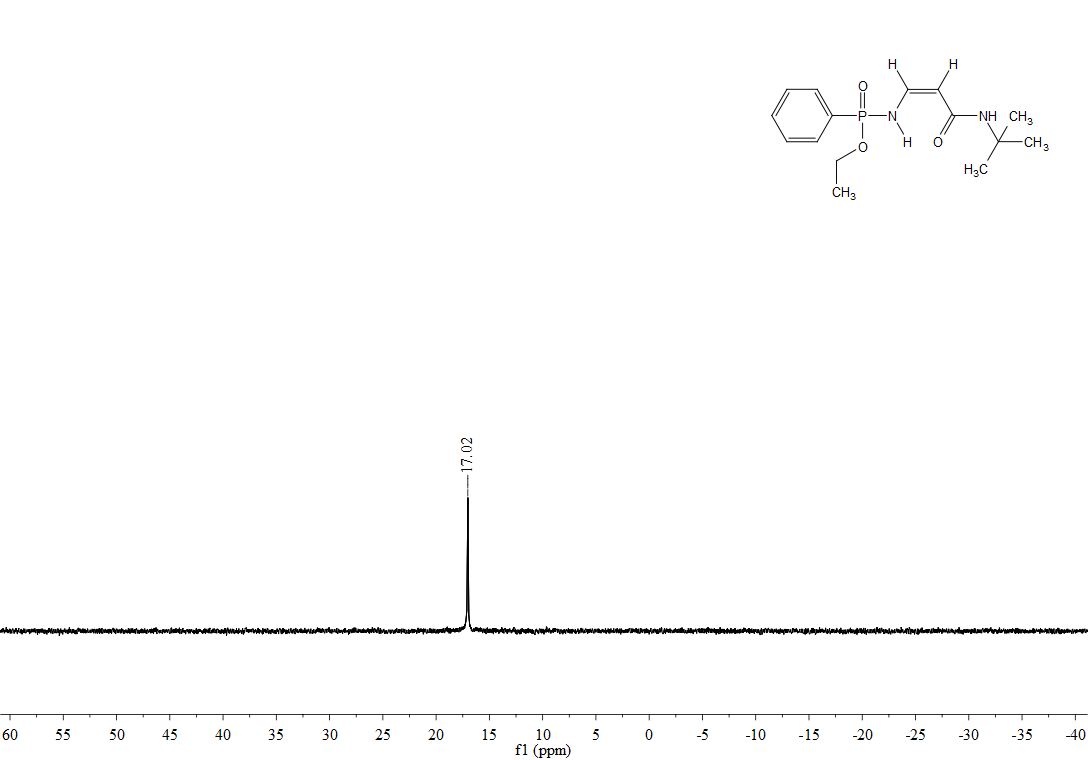
**

**1H, 13C and 31P -NMR spectra of 3ah/3ah'**

**
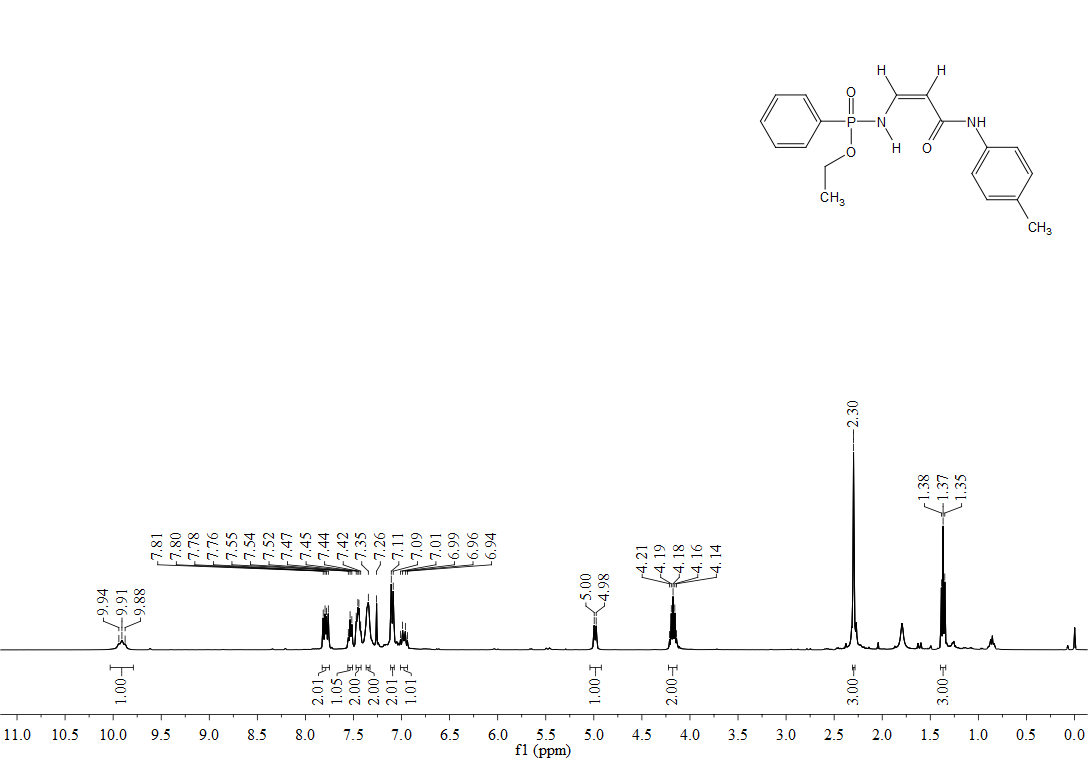
**

**
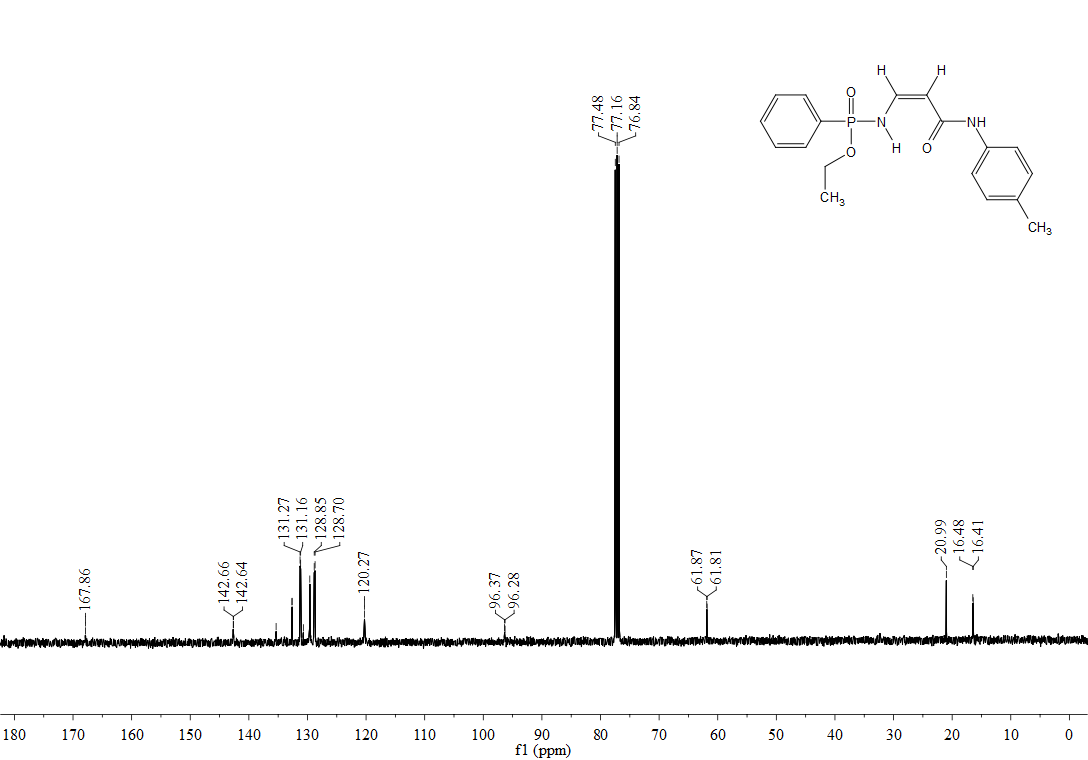
**

**
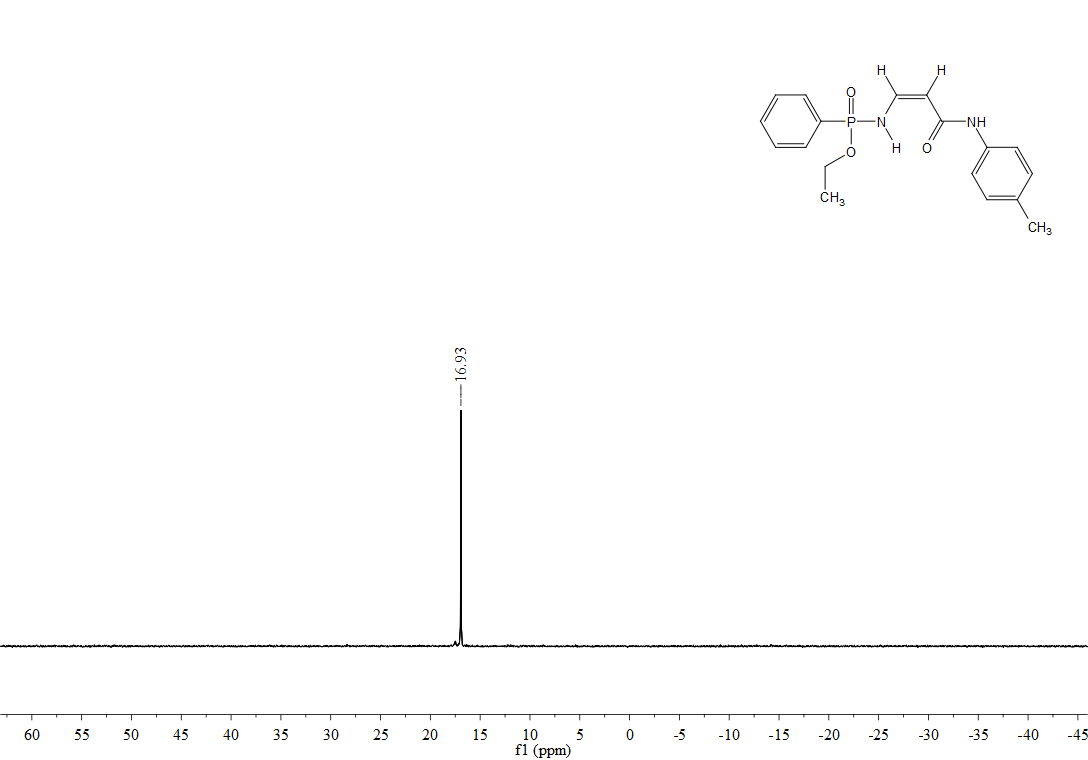
**

**1H, 13C and 31P -NMR spectra of 3ai + 3ai’**

**
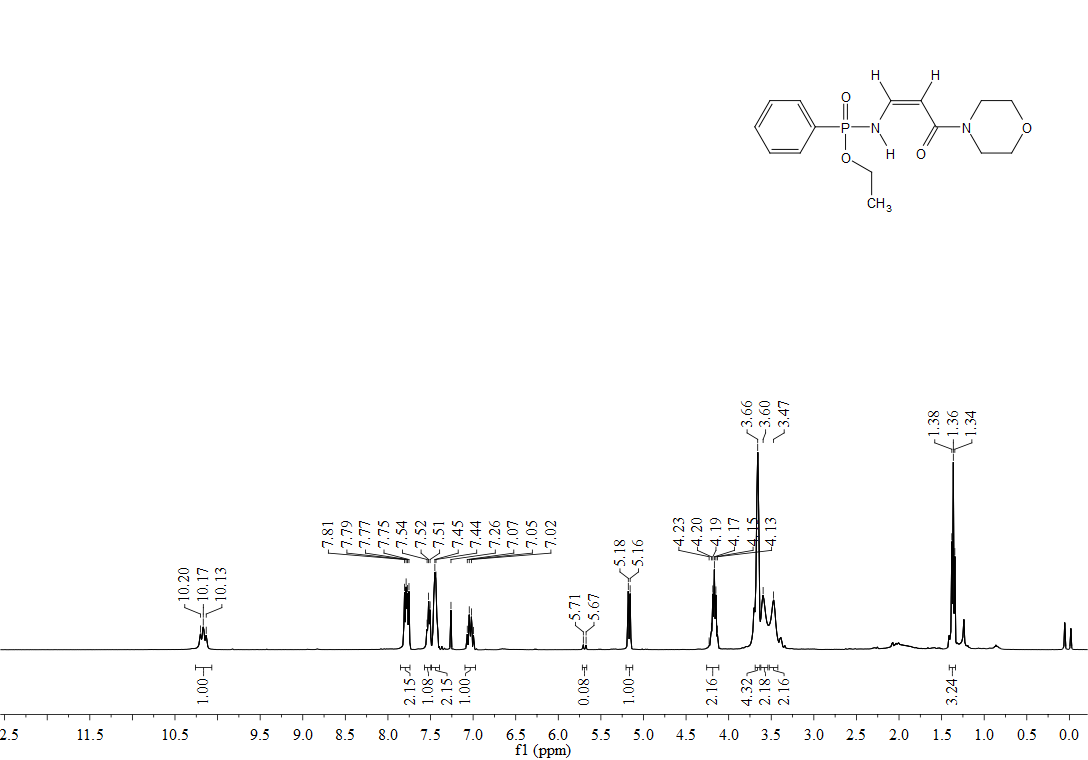
**

**
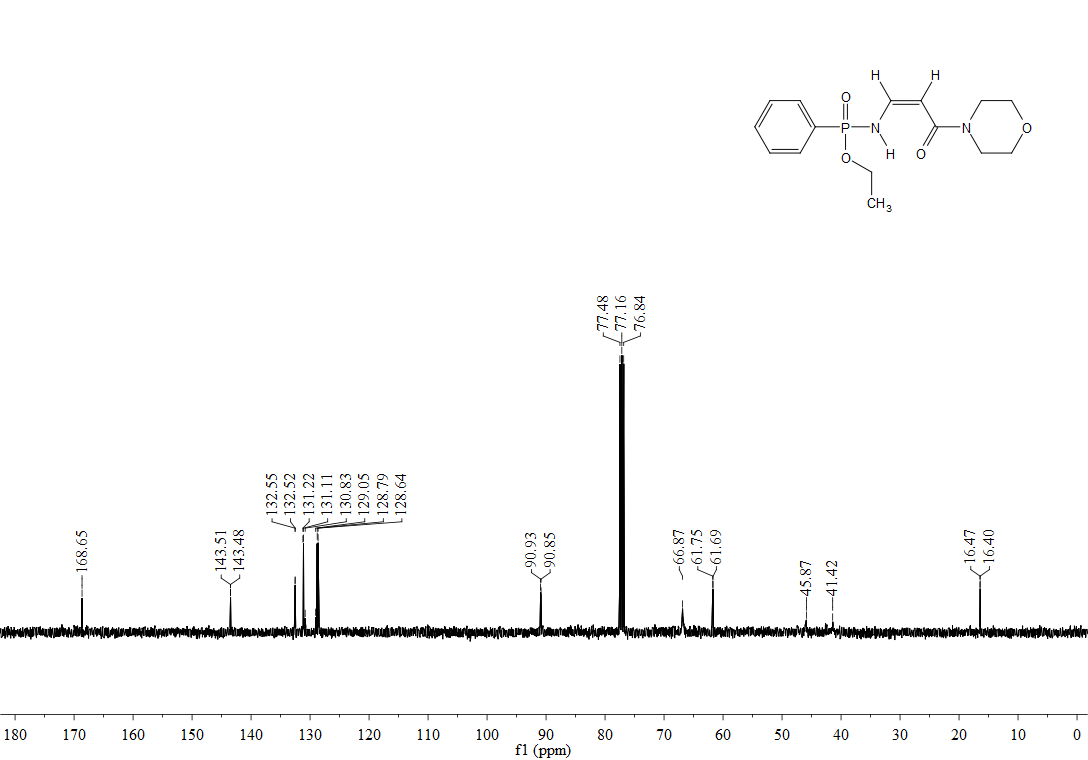
**

**
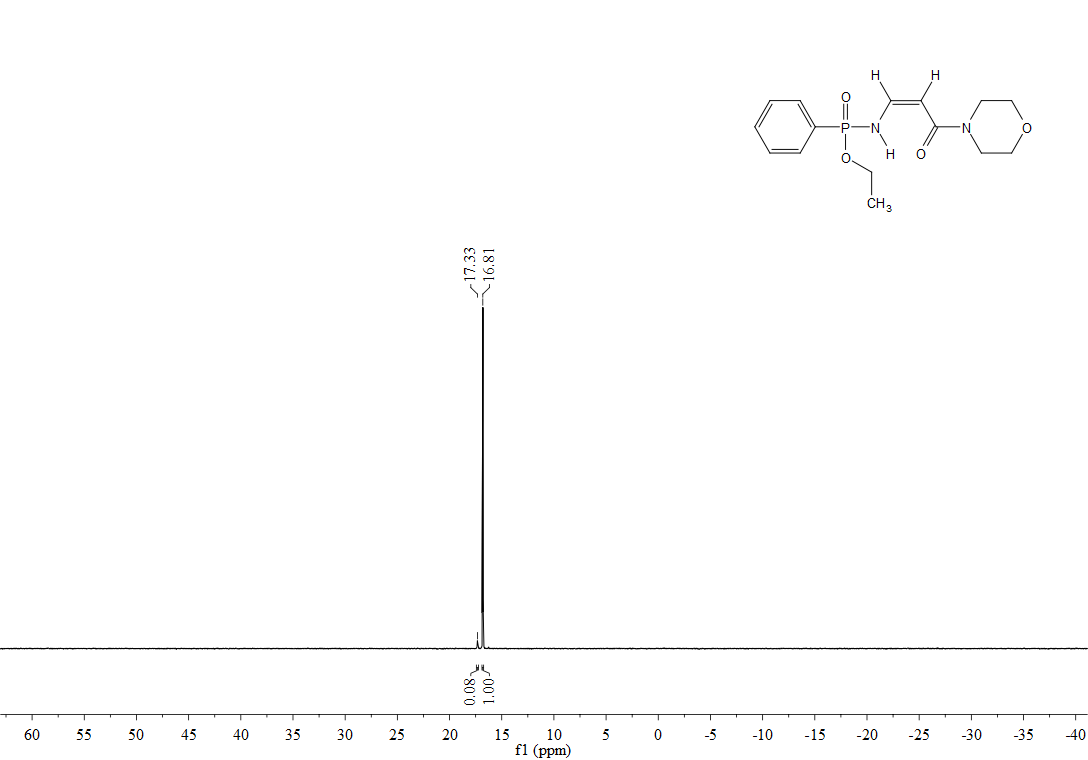
**

**1H, 13C and 31P -NMR spectra of 3ba/3ba'**

**
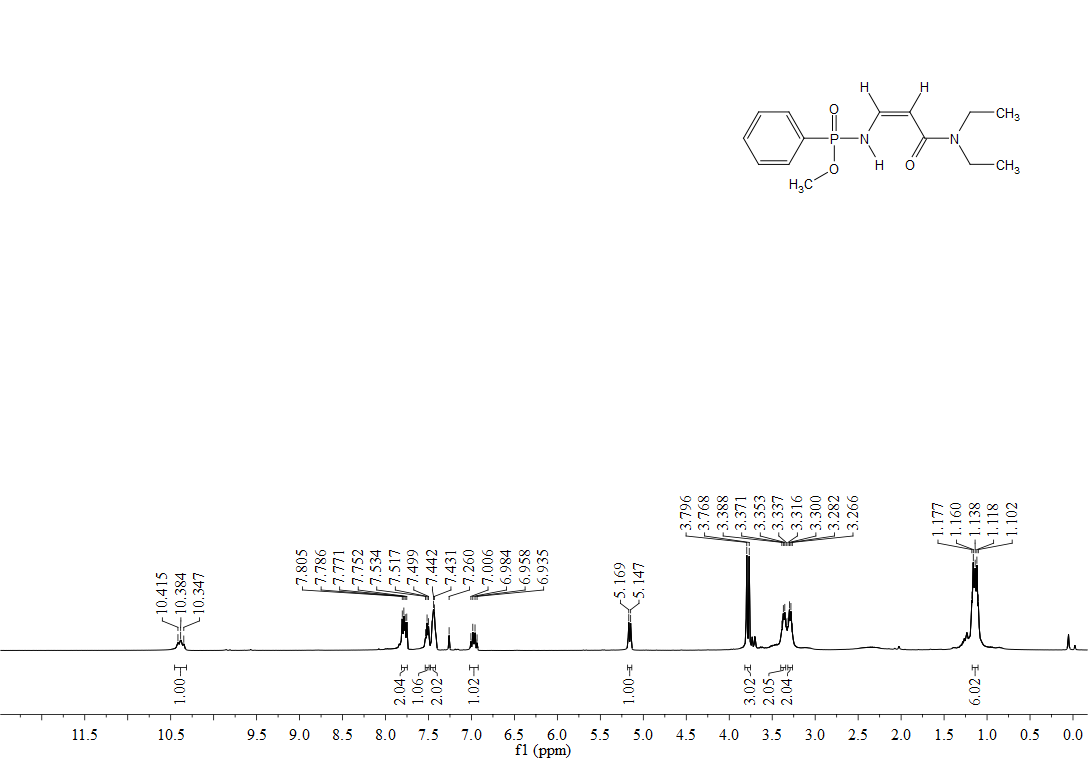
**

**
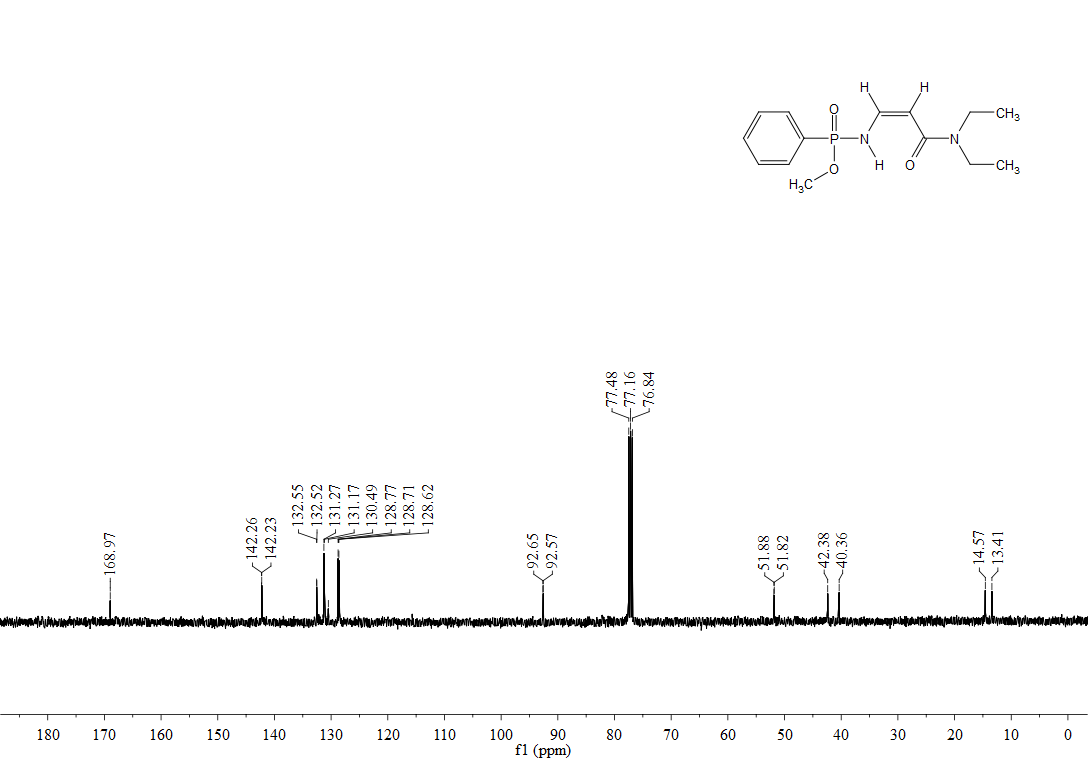
**

**
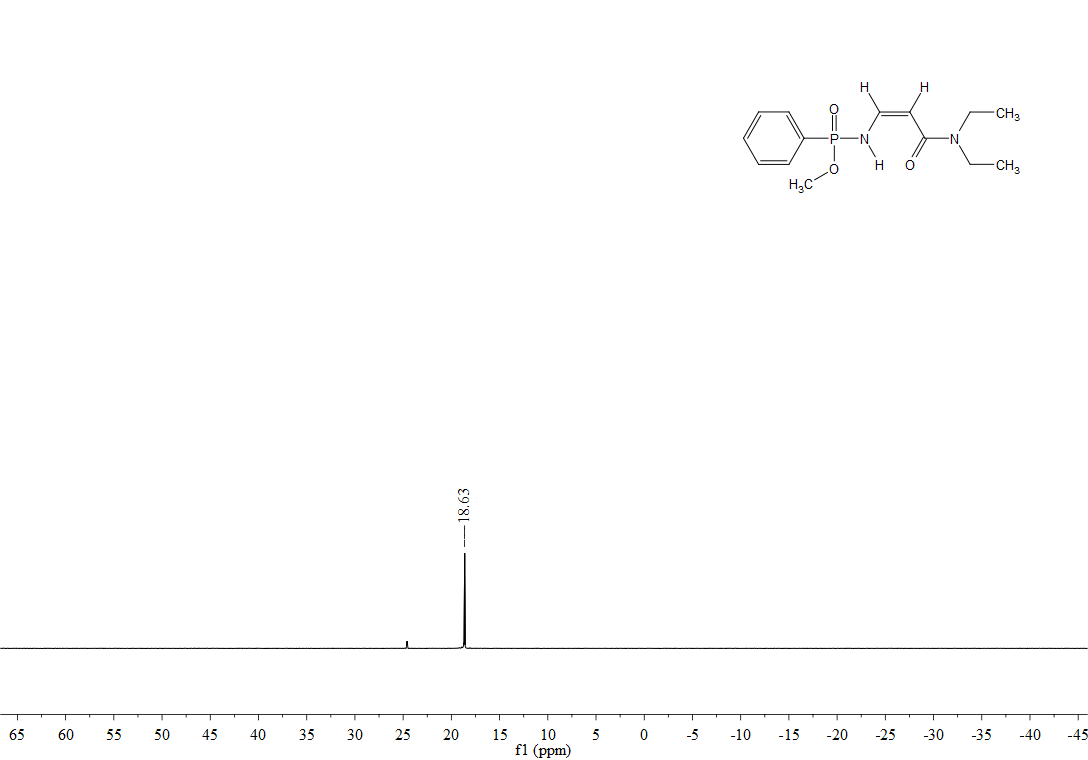
**

**1H, 13C and 31P -NMR spectra of 3ca + 3ca’**

**
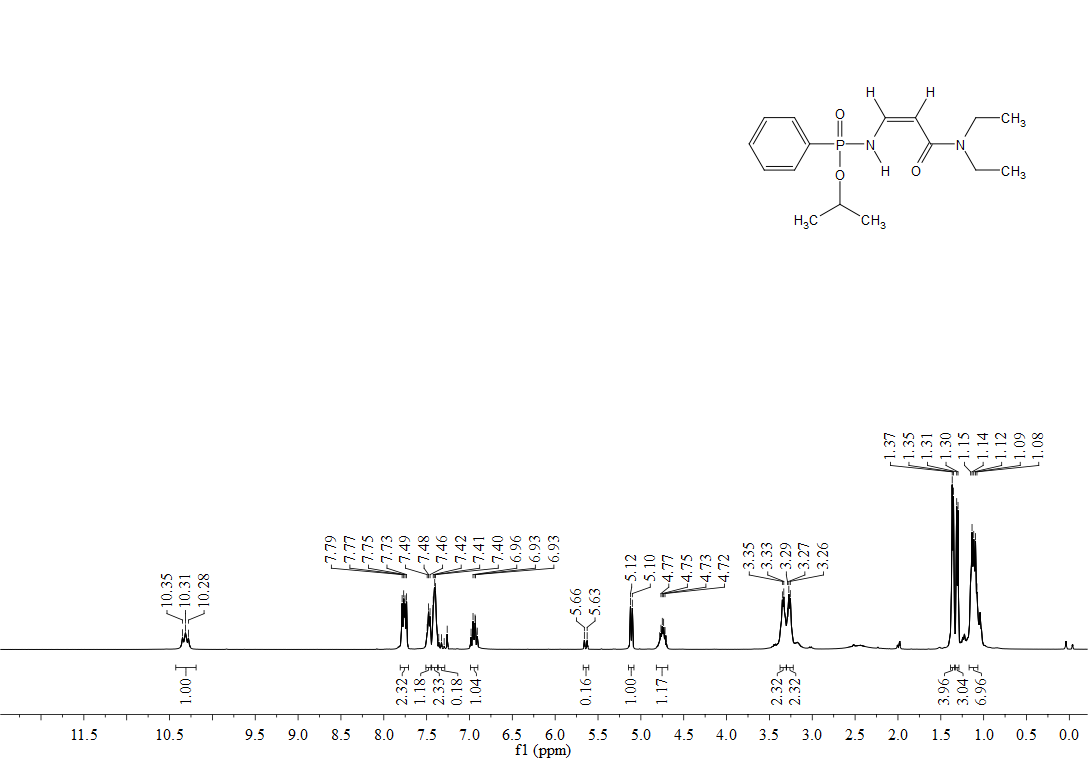
**

**
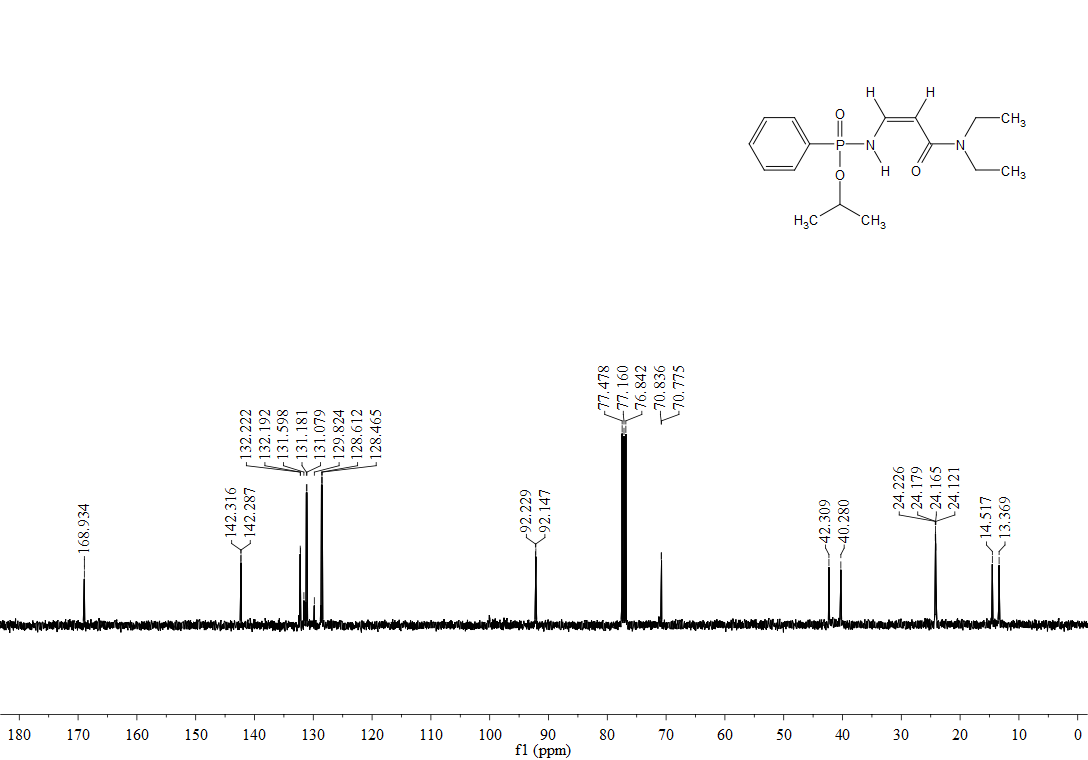
**

**
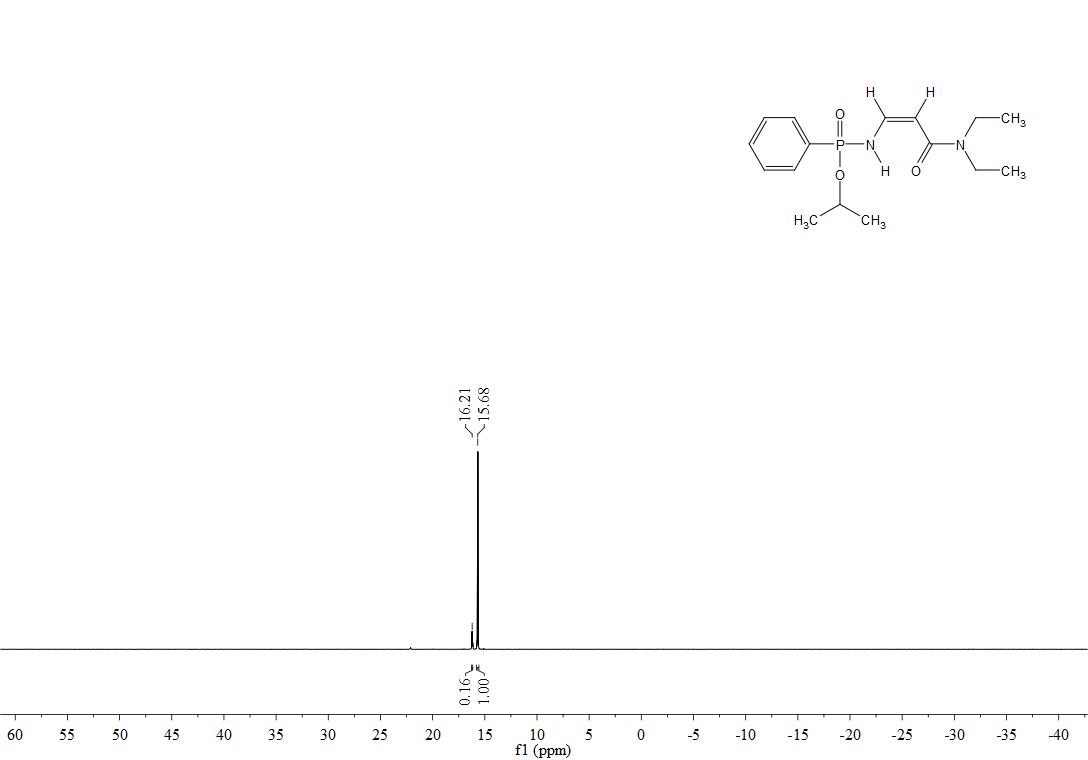
**

**1H, 13C and 31P -NMR spectra of 3da/3da'**

**
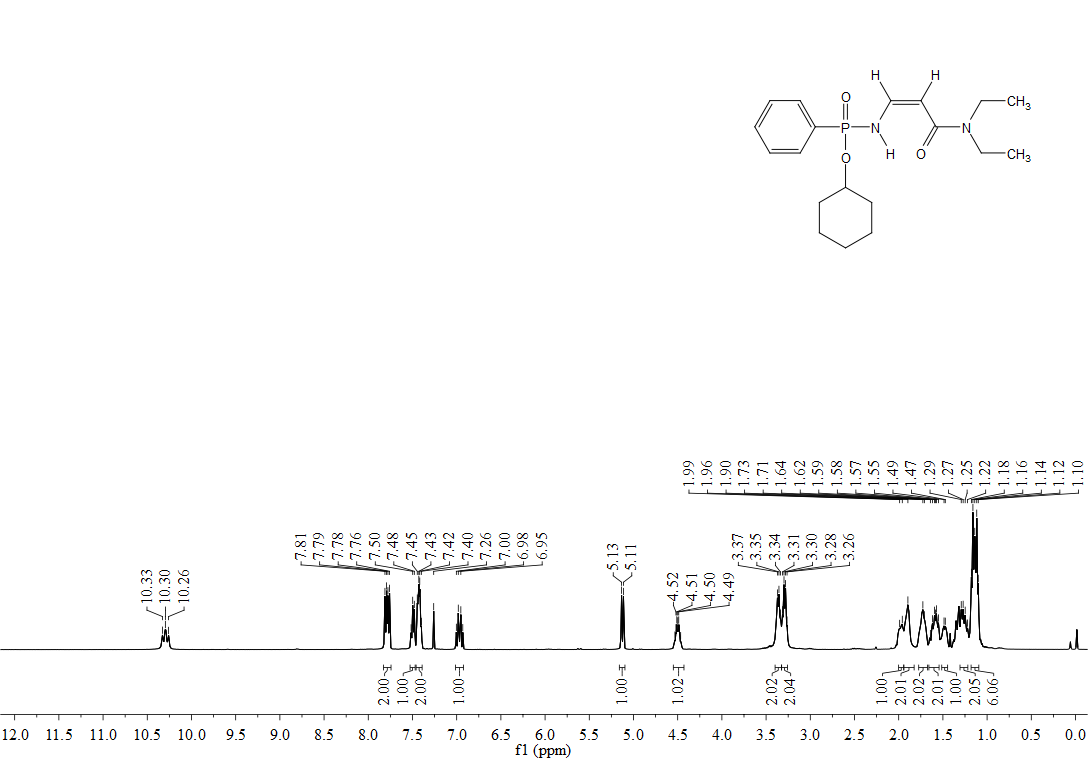
**

**
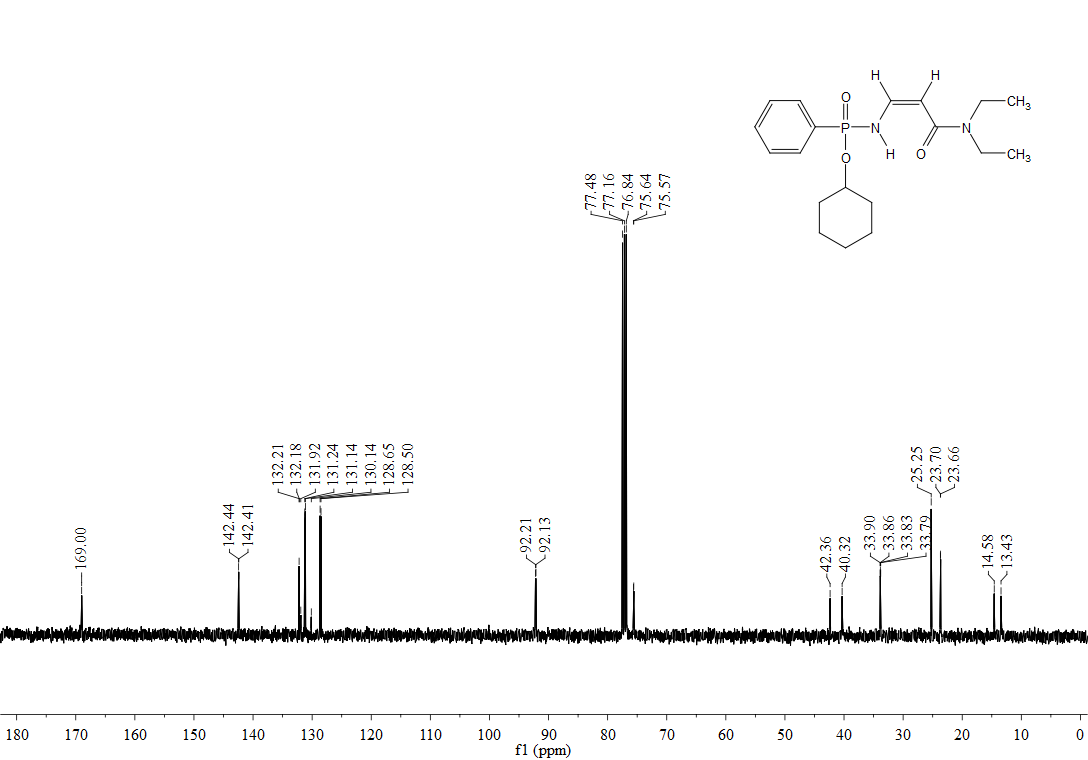
**

**
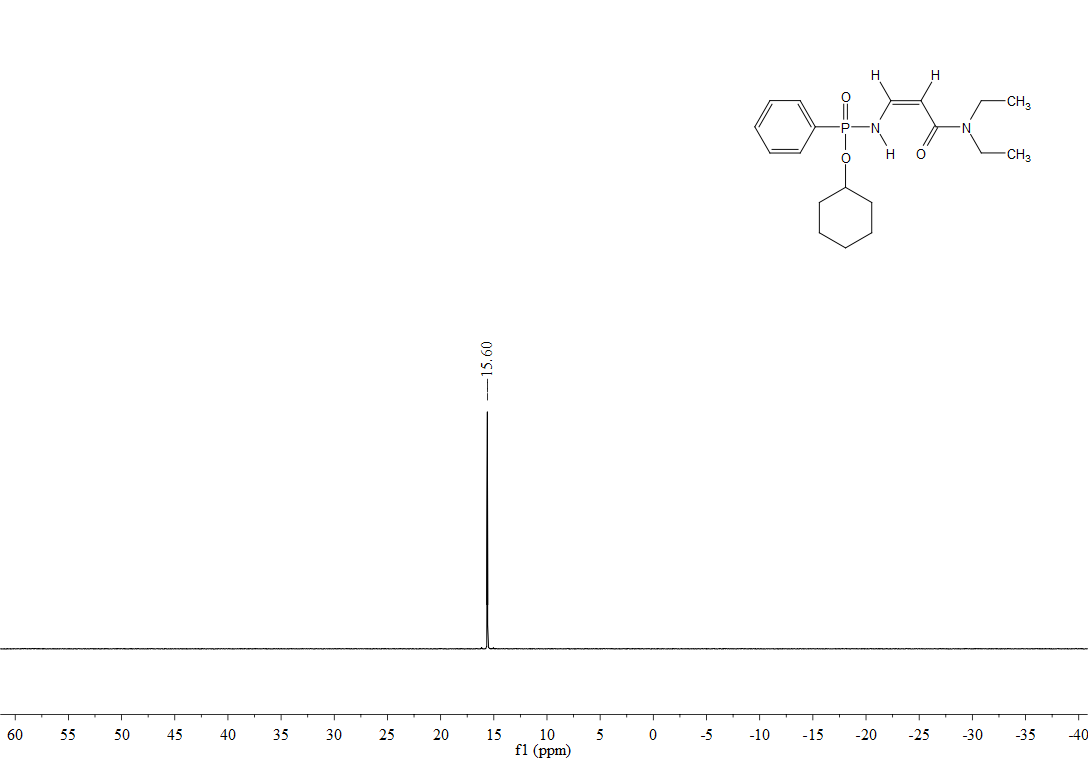
**

**1H, 13C and 31P -NMR spectra of 3ea/3ea'**

**
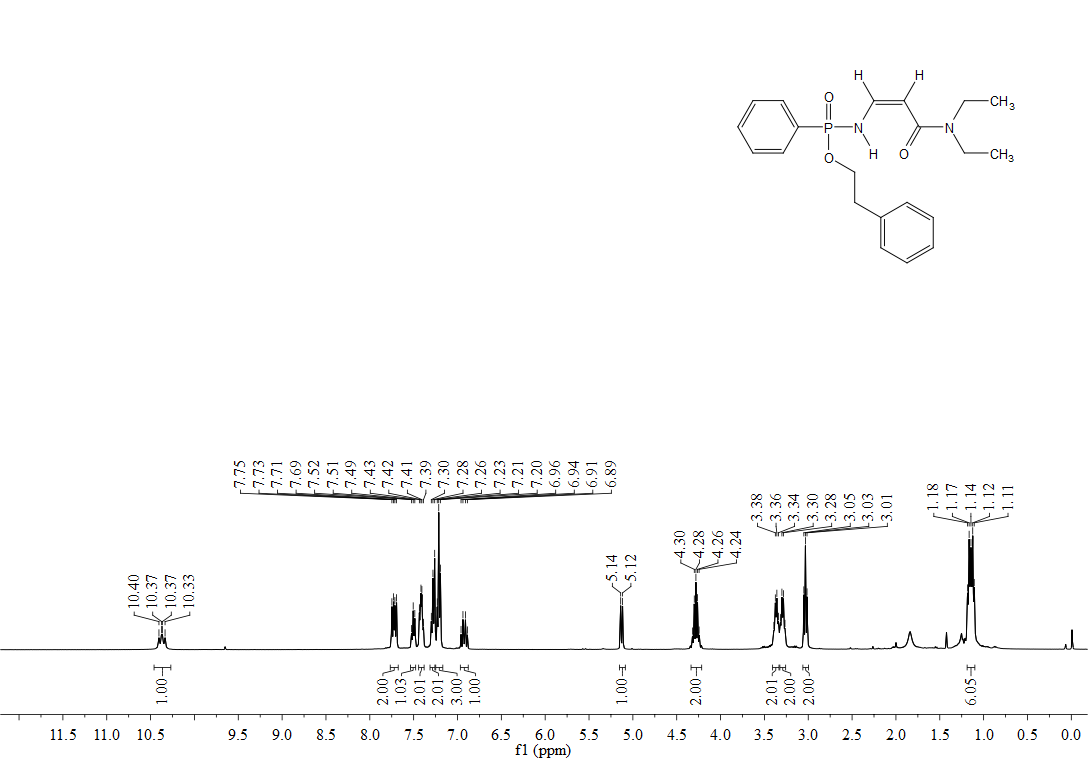
**

**
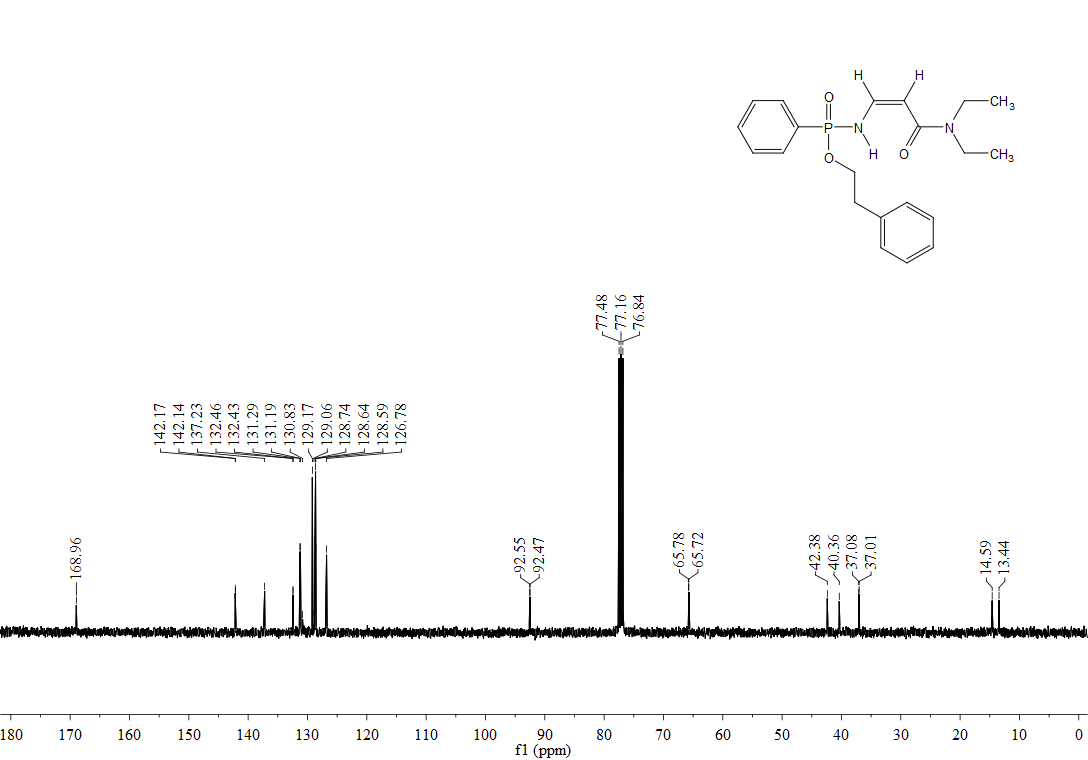
**

**
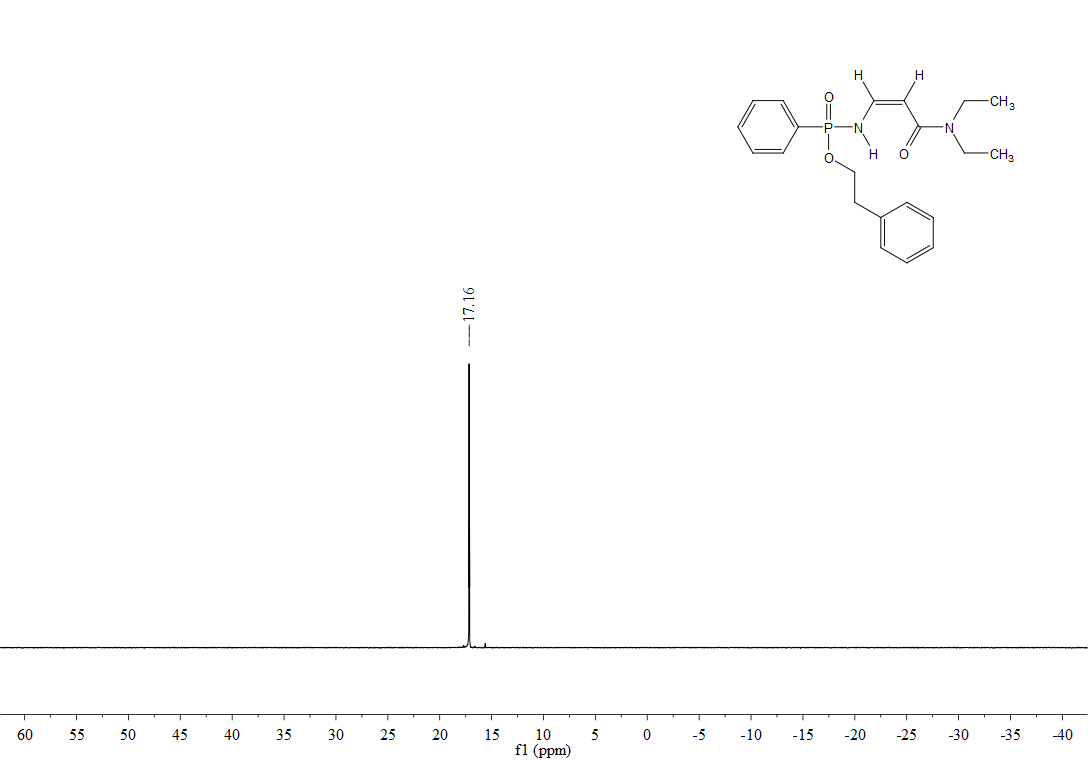
**

**1H, 13C and 31P -NMR spectra of 3fa/3fa'**

**
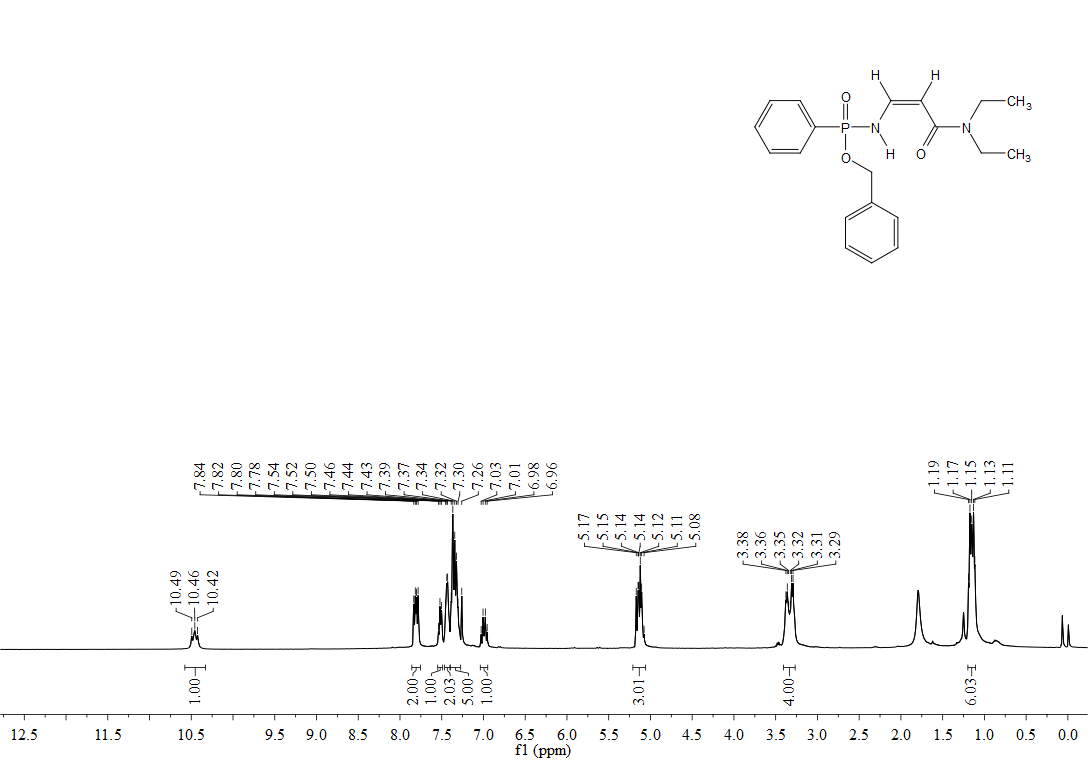
**

**
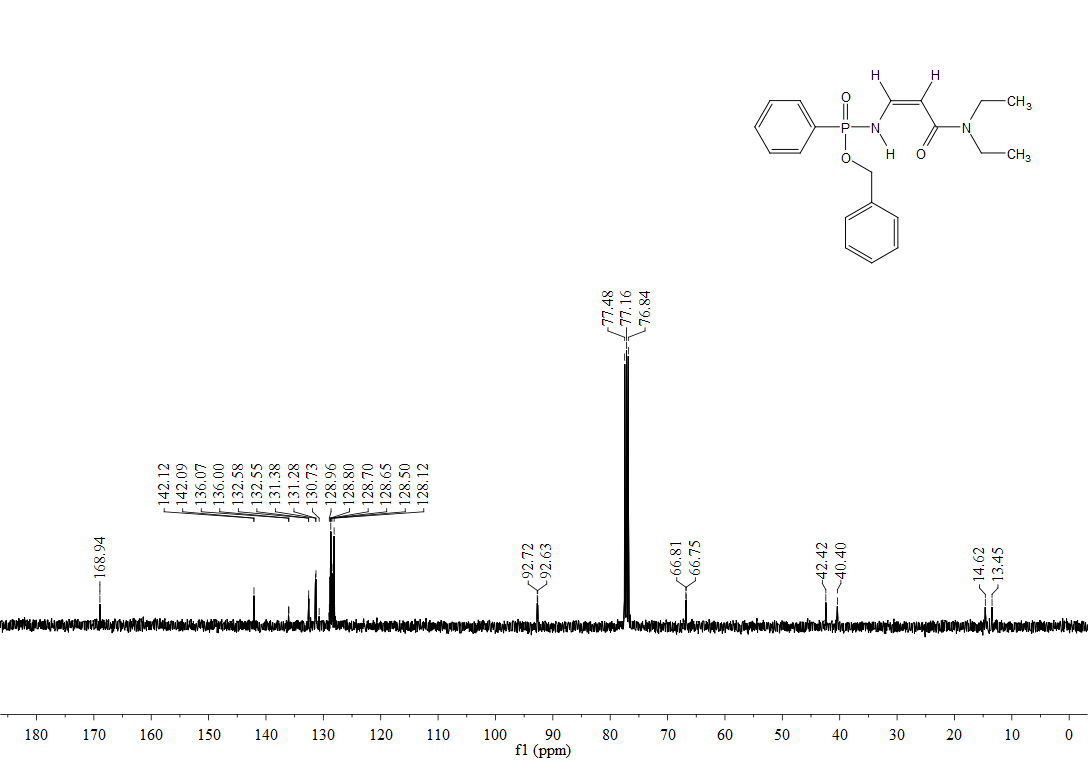
**

**
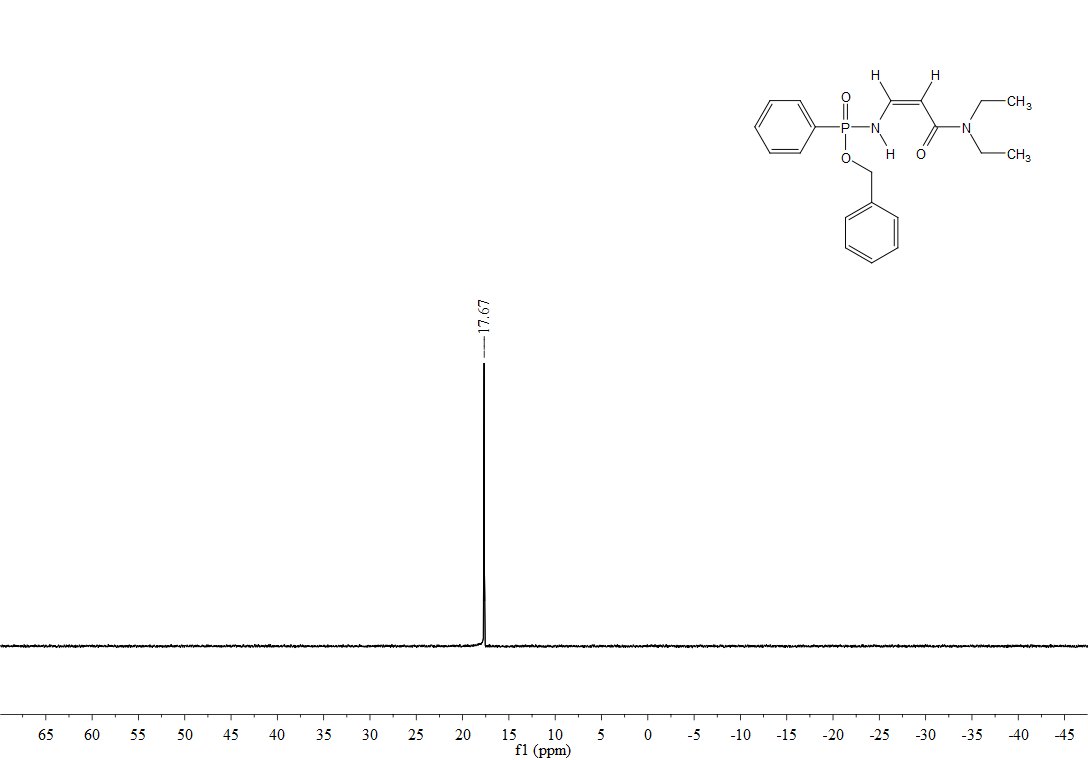
**

**1H, 13C , 31P and 19F-NMR spectra of 3ga + 3ga’**

**
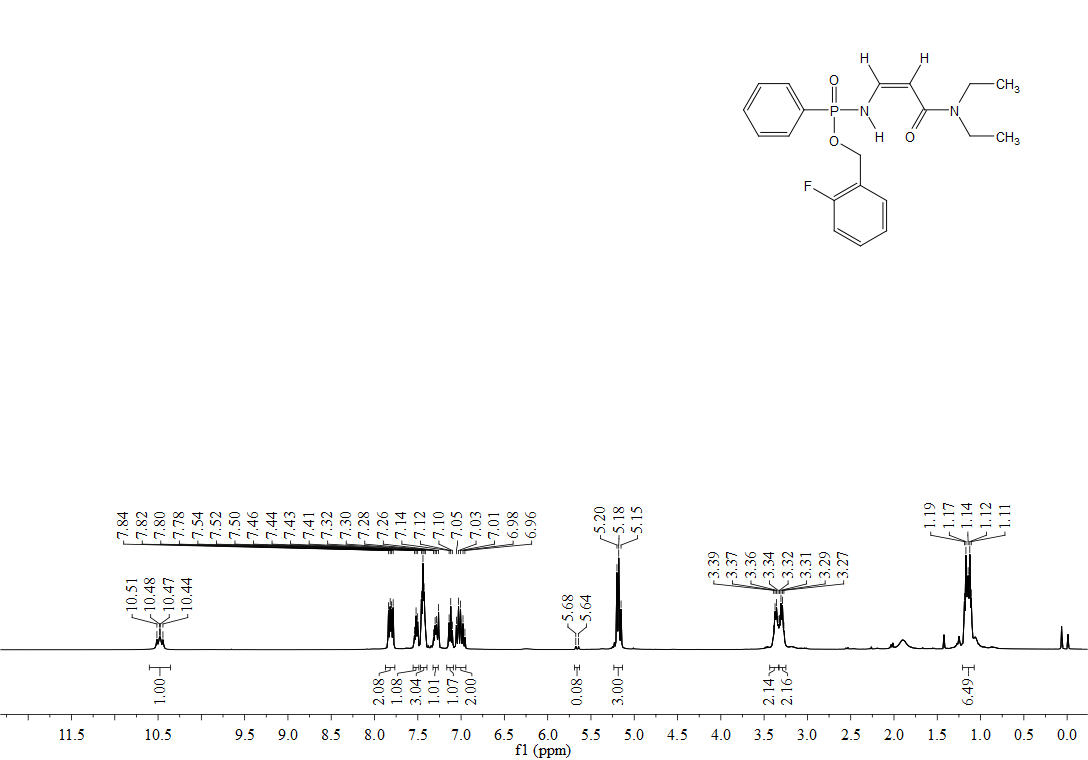
**

**
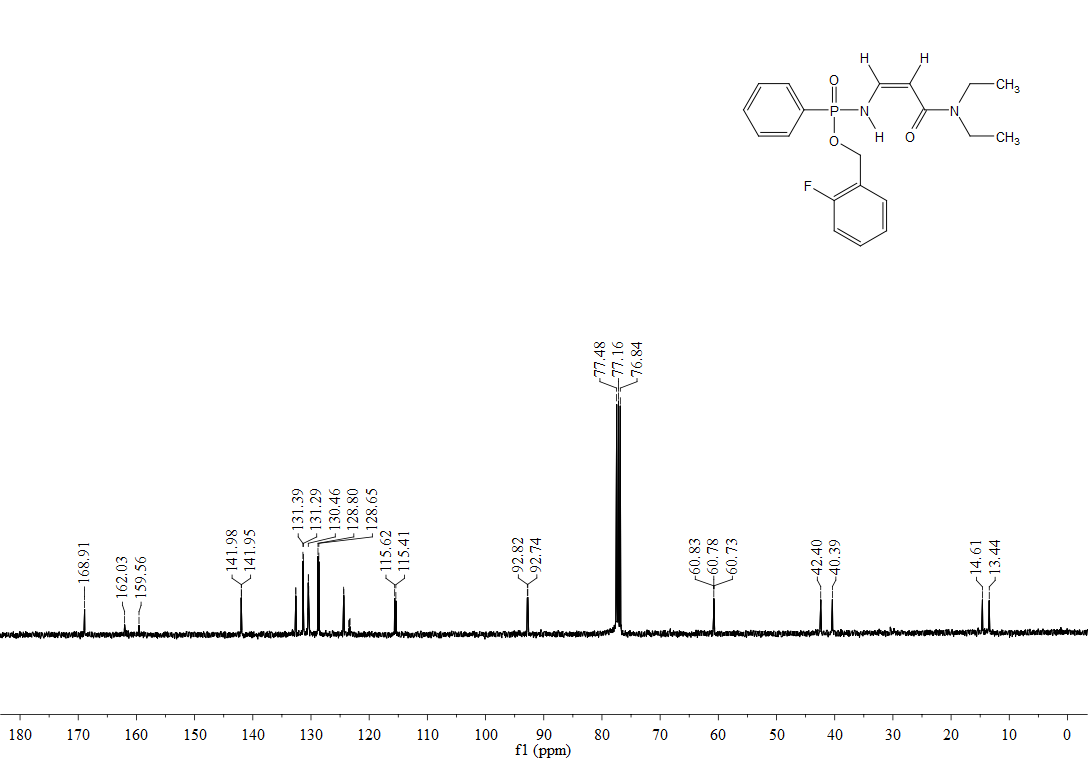
**

**
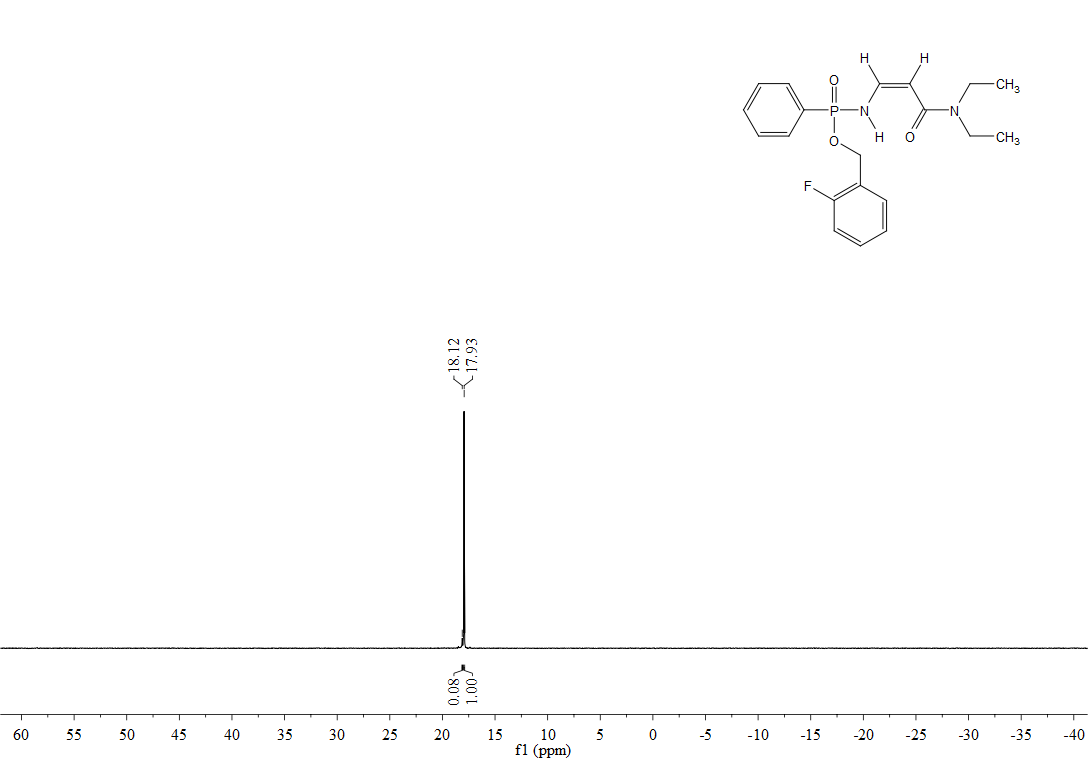
**

**
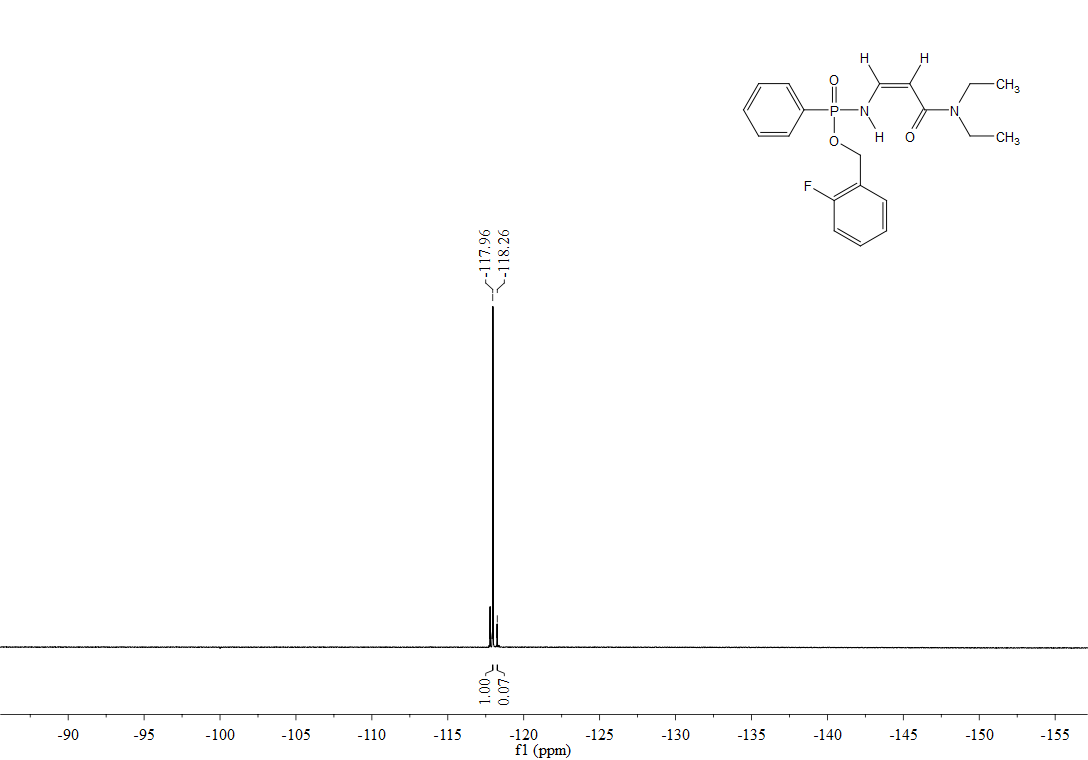
**

**1H, 13C and 31P -NMR spectra of 3ha/3ha'**

**
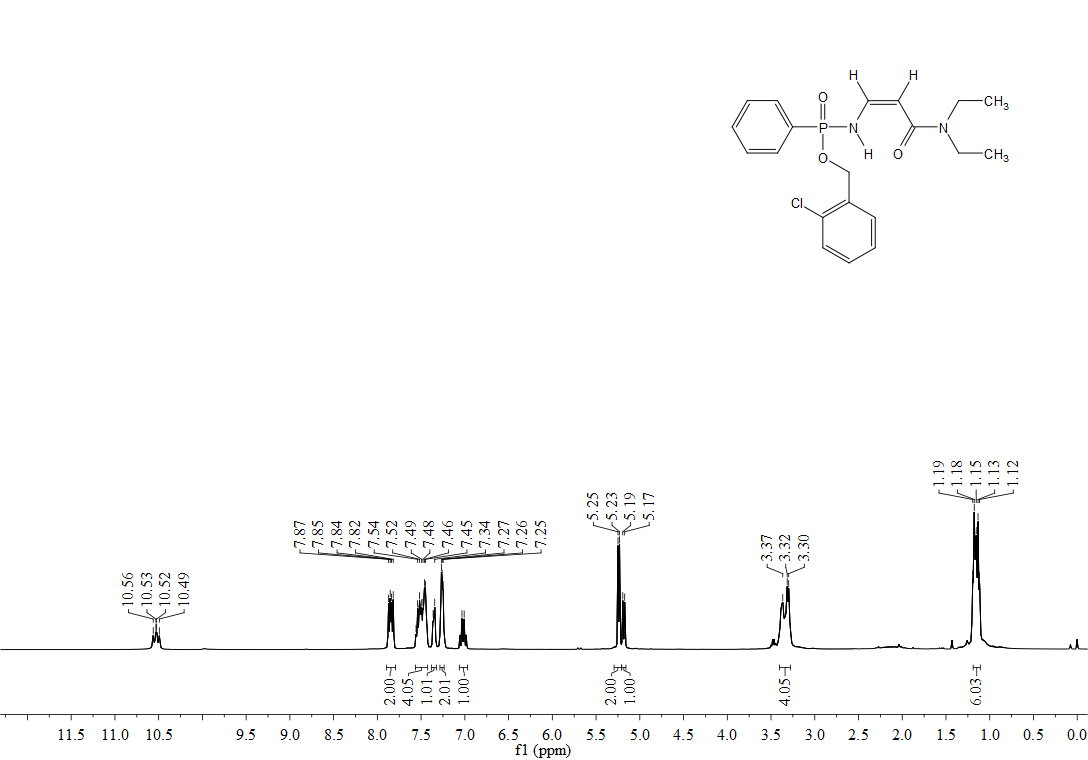
**

**
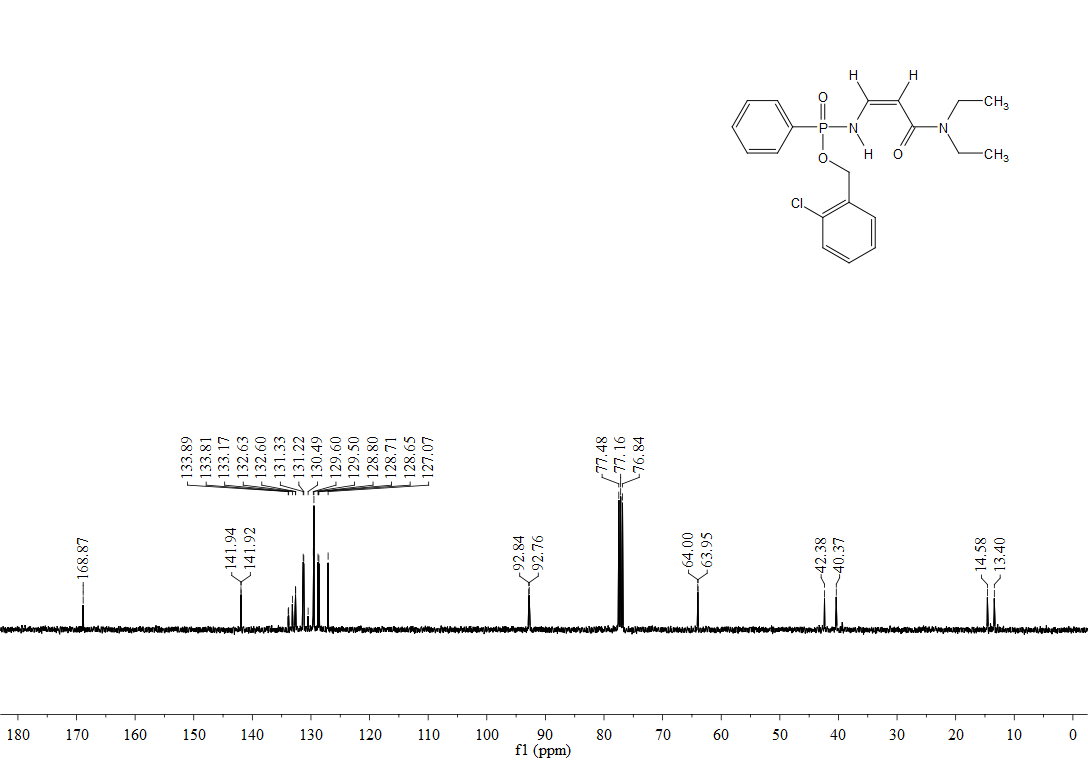
**

**
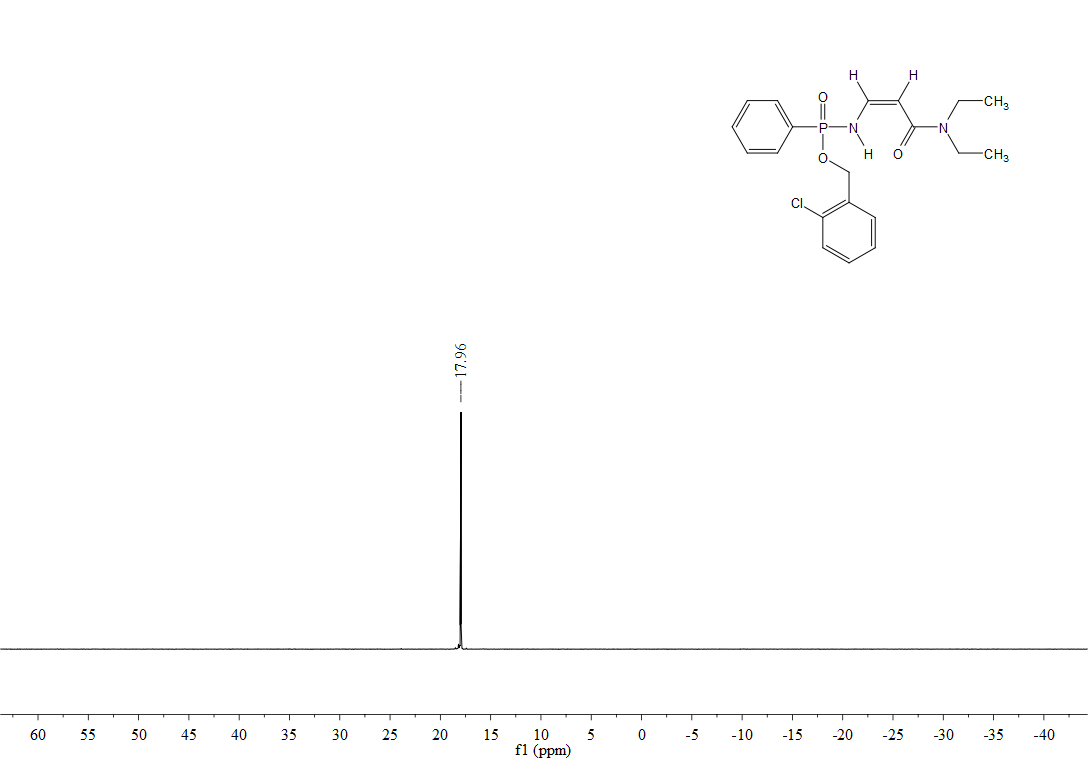
**

**1H, 13C and 31P -NMR spectra of 3ia/3ia'**

**
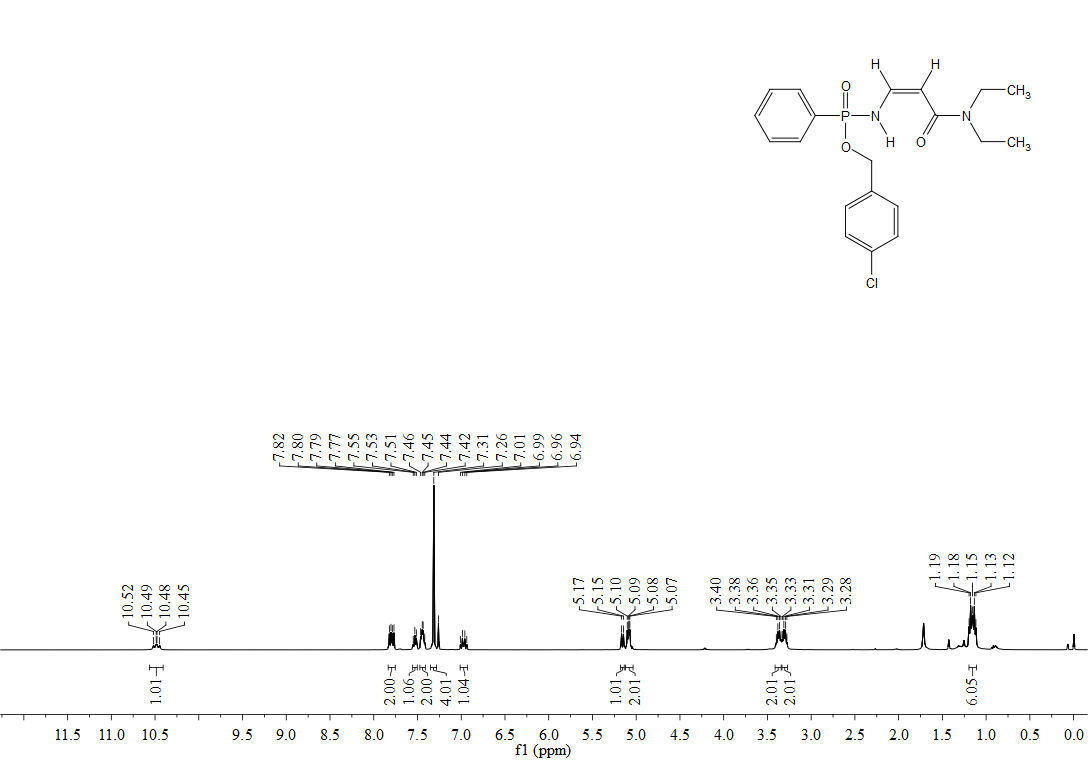
**

**
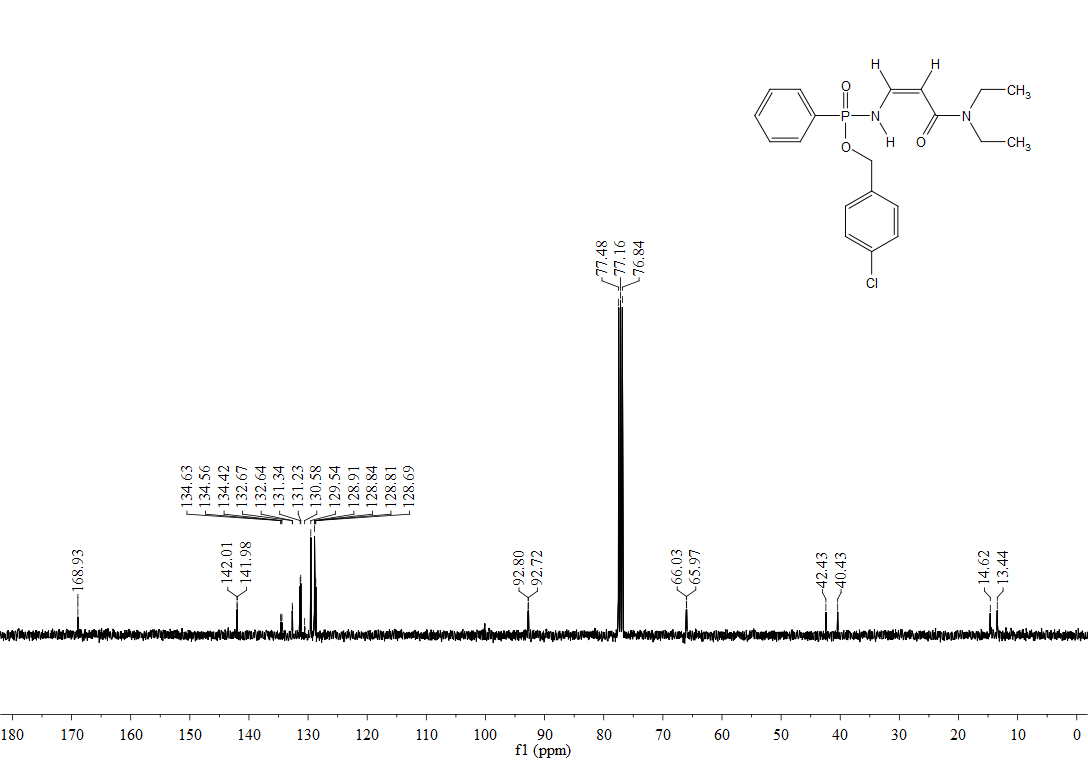
**

**
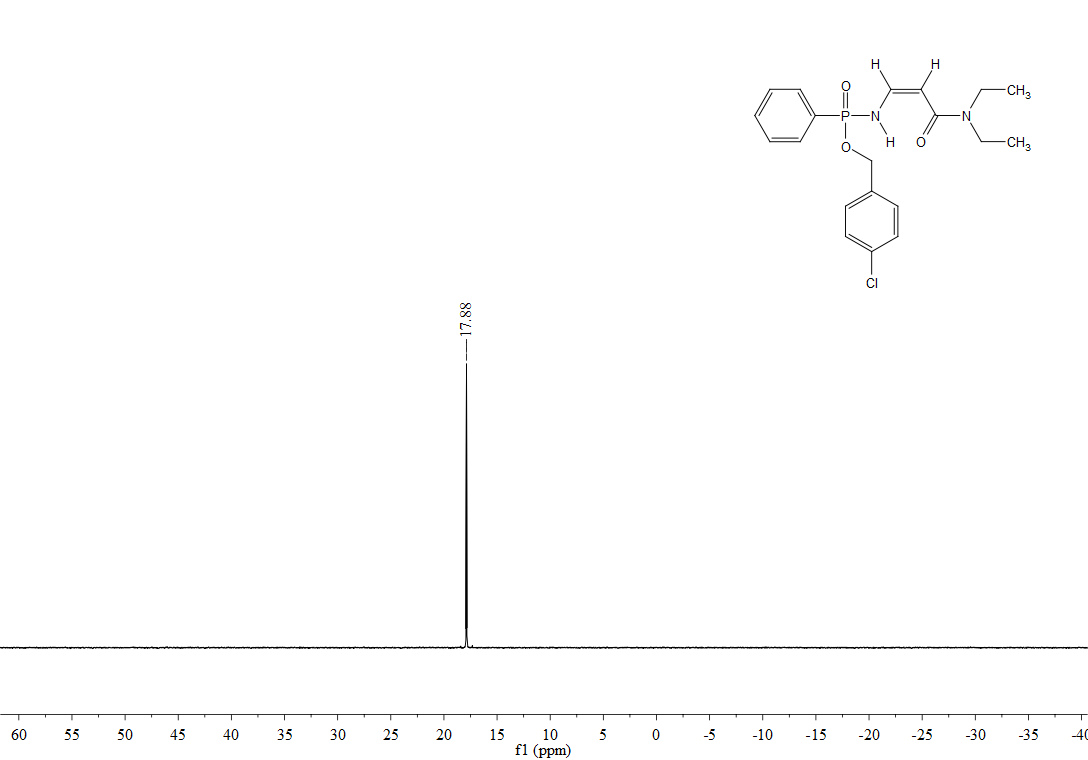
**

**1H, 13C and 31P -NMR spectra of 3ja/3ja'**

**
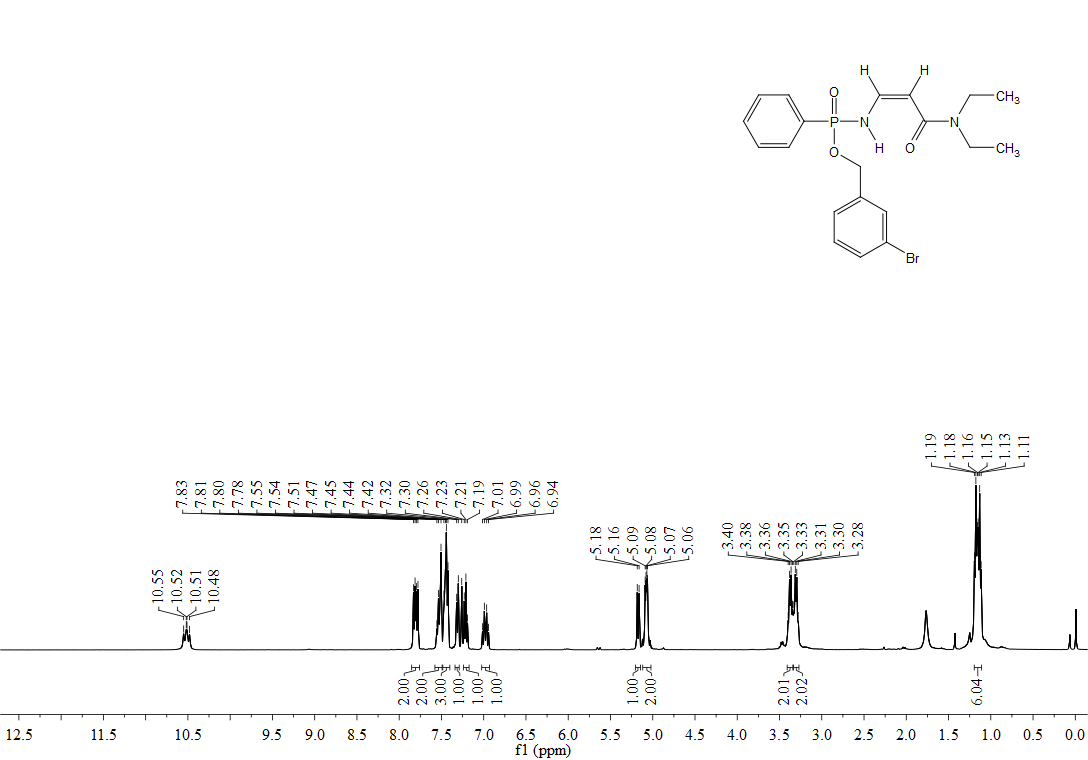
**

**
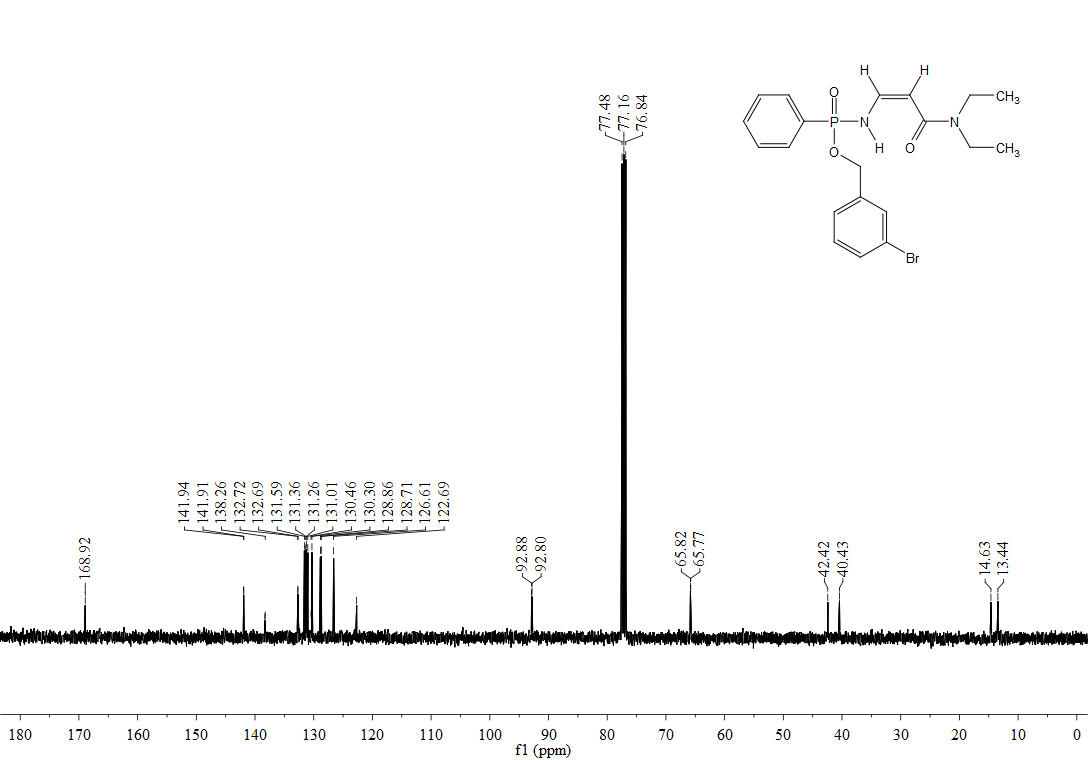
**

**
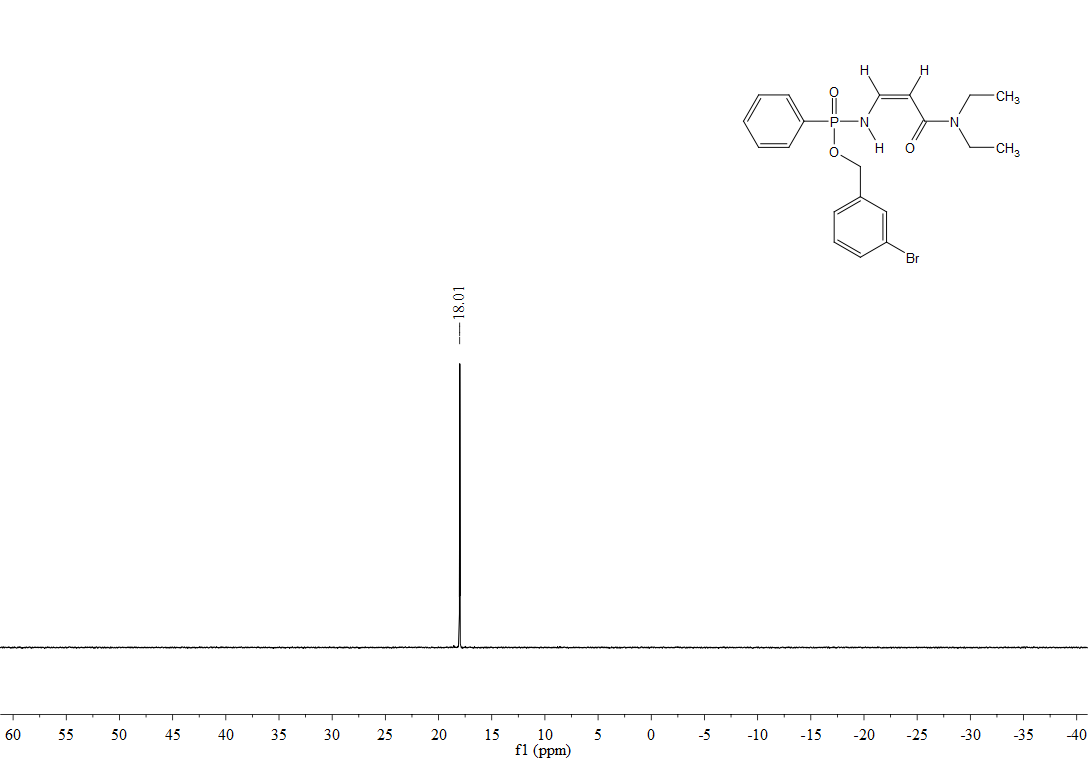
**

**1H, 13C and 31P -NMR spectra of 3ka/3ka'**

**
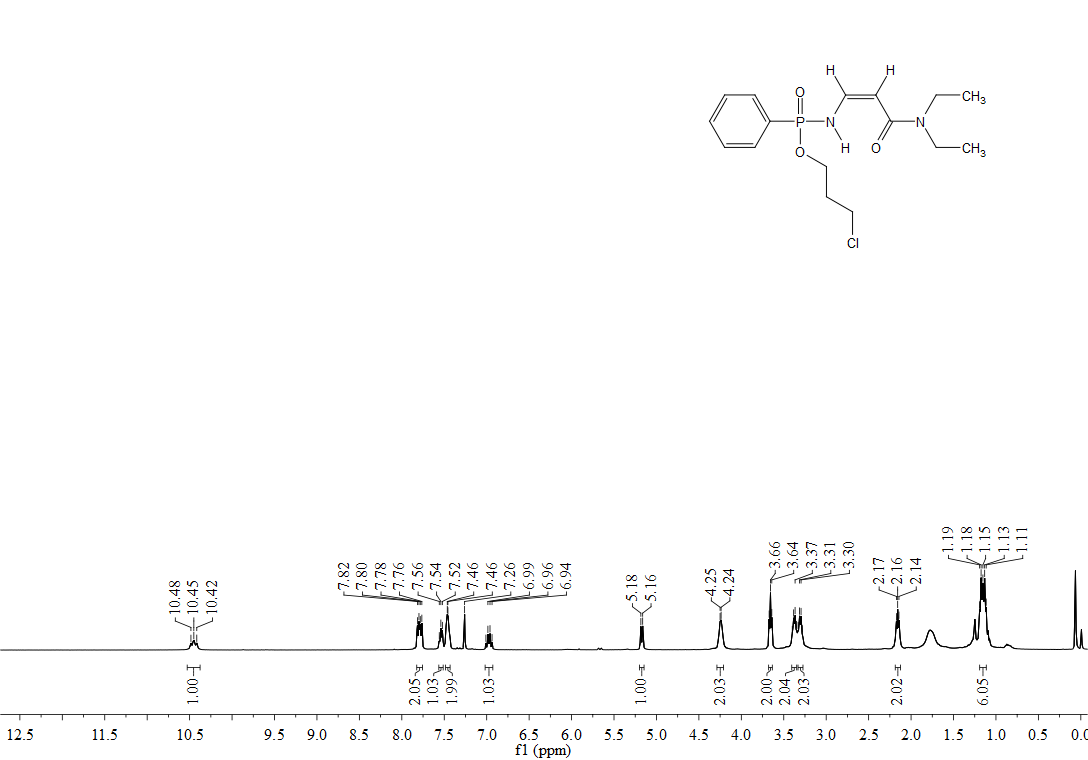
**

**
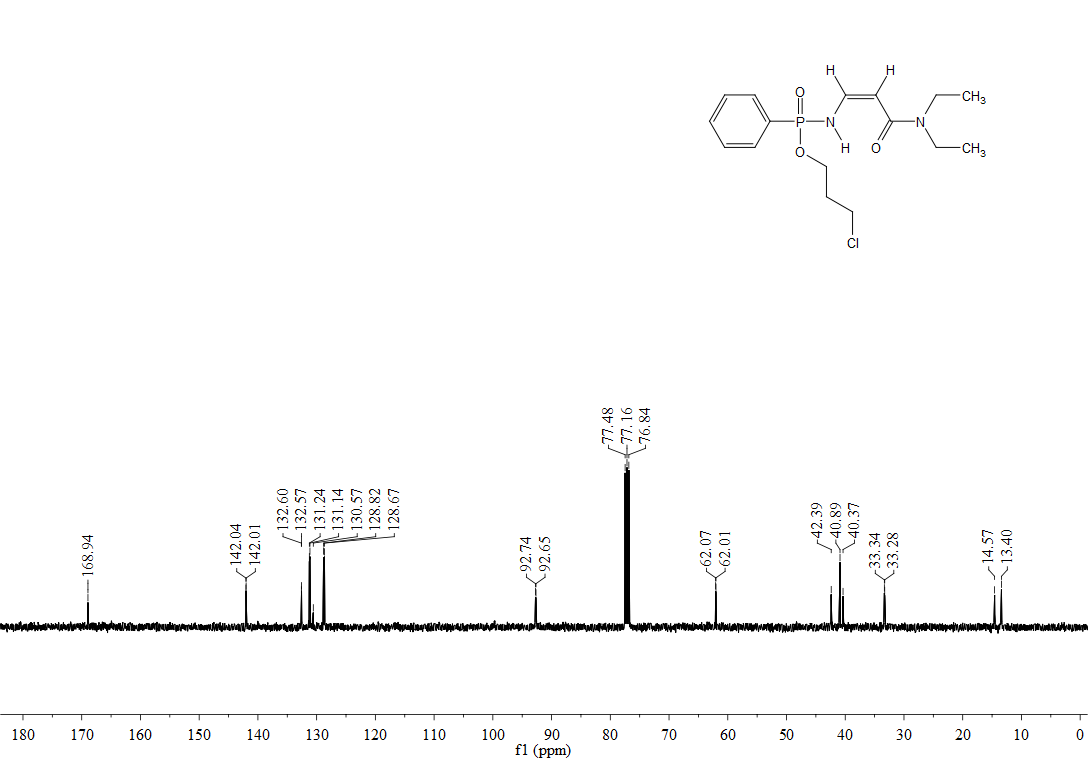
**

**
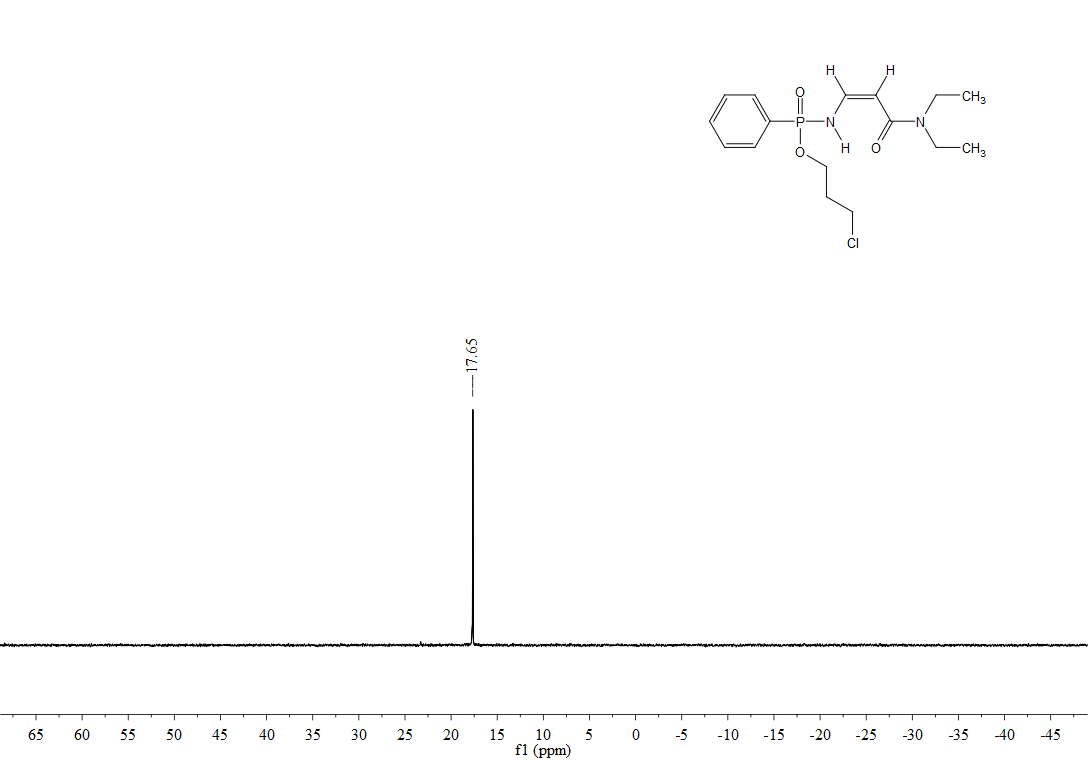
**

**1H, 13C and 31P -NMR spectra of 3ej**

**
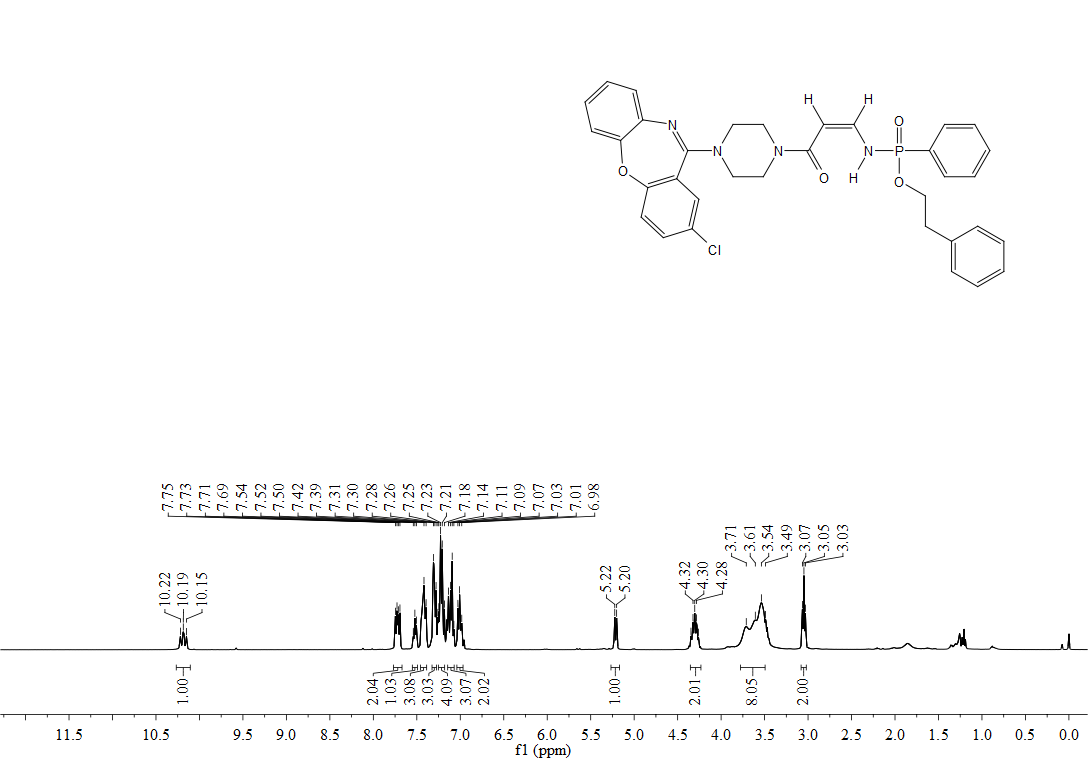
**

**
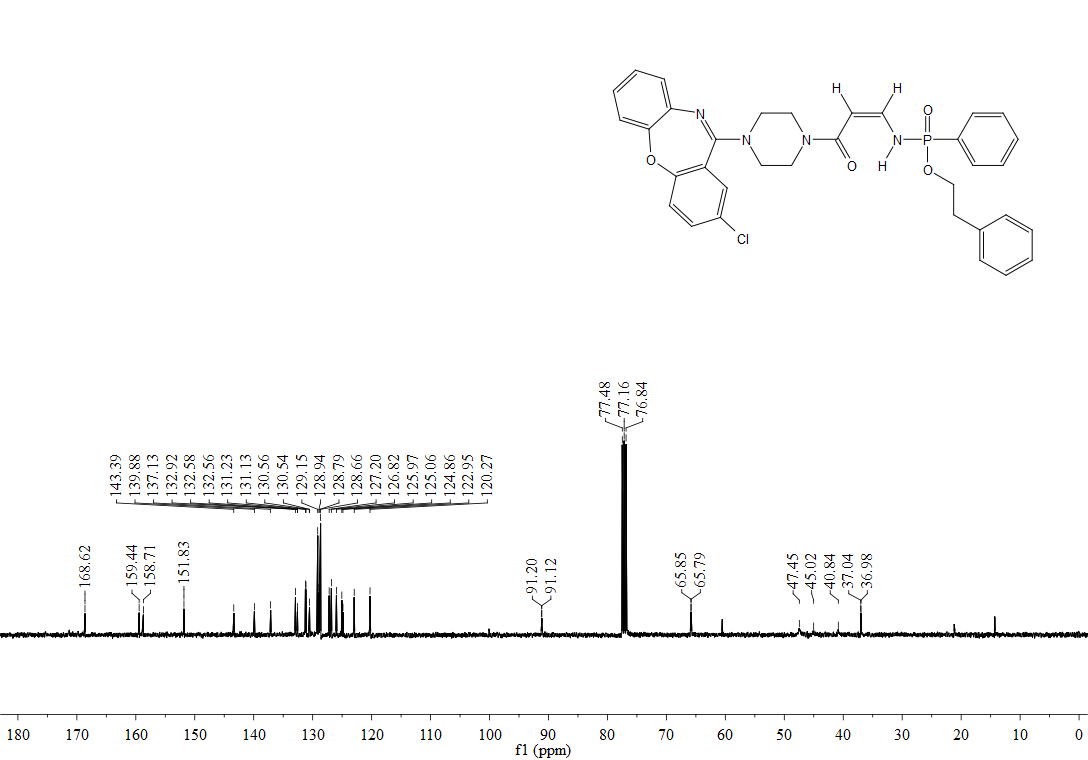
**

**
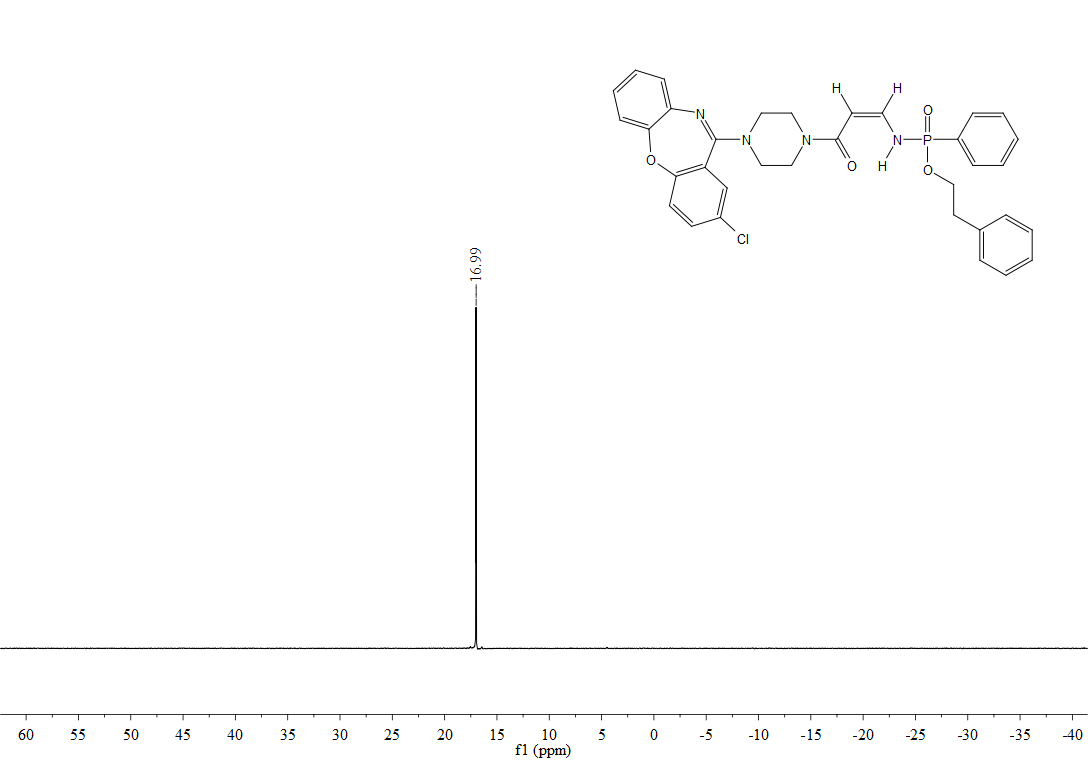
**

**1H and 13C -NMR spectra of 2j**

**
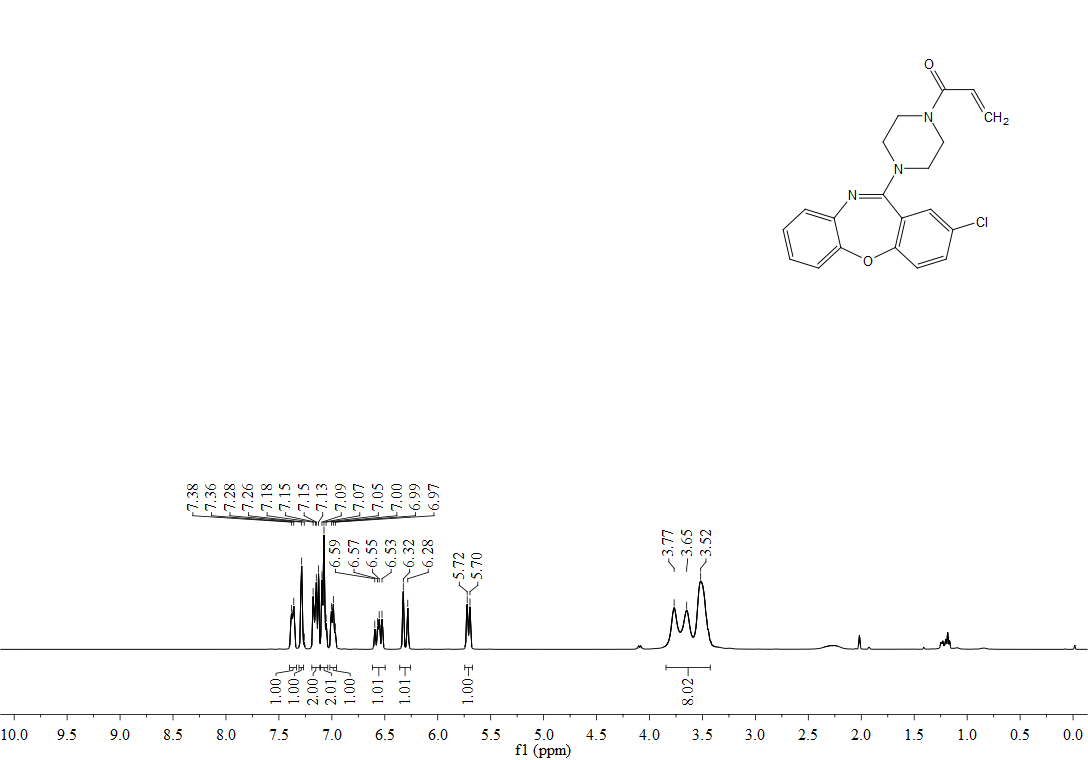
**

**
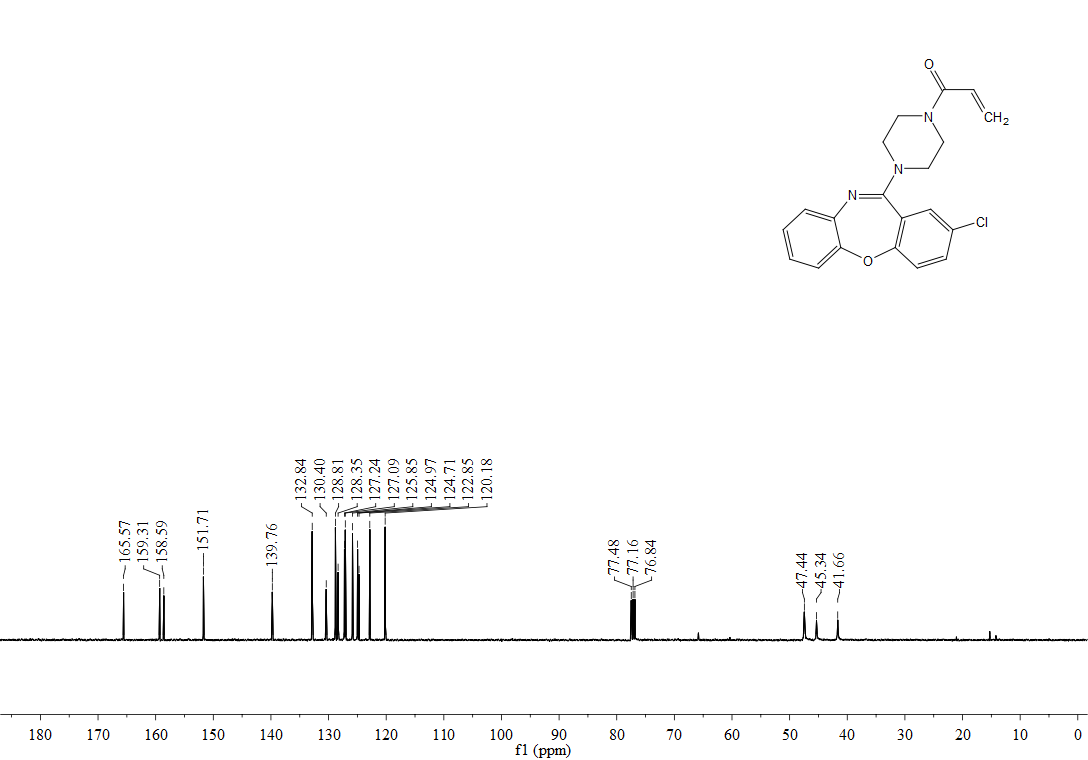
**

**1H, 13C and 31P -NMR spectra of 5aa**

**
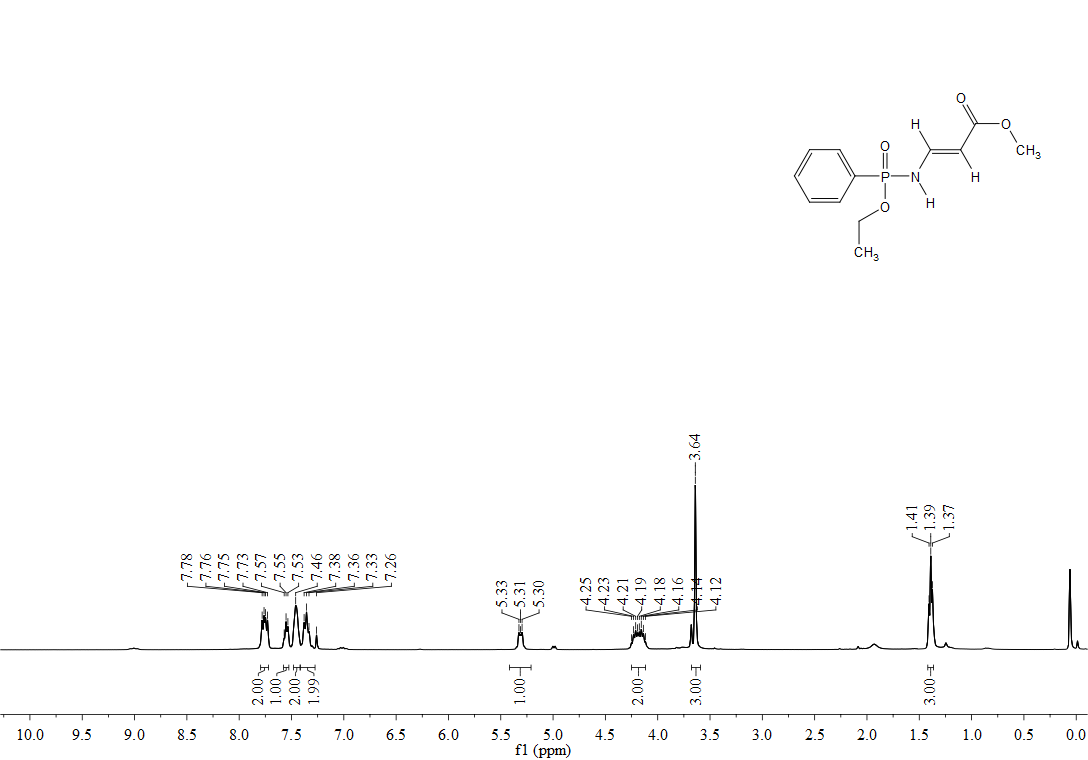
**

**
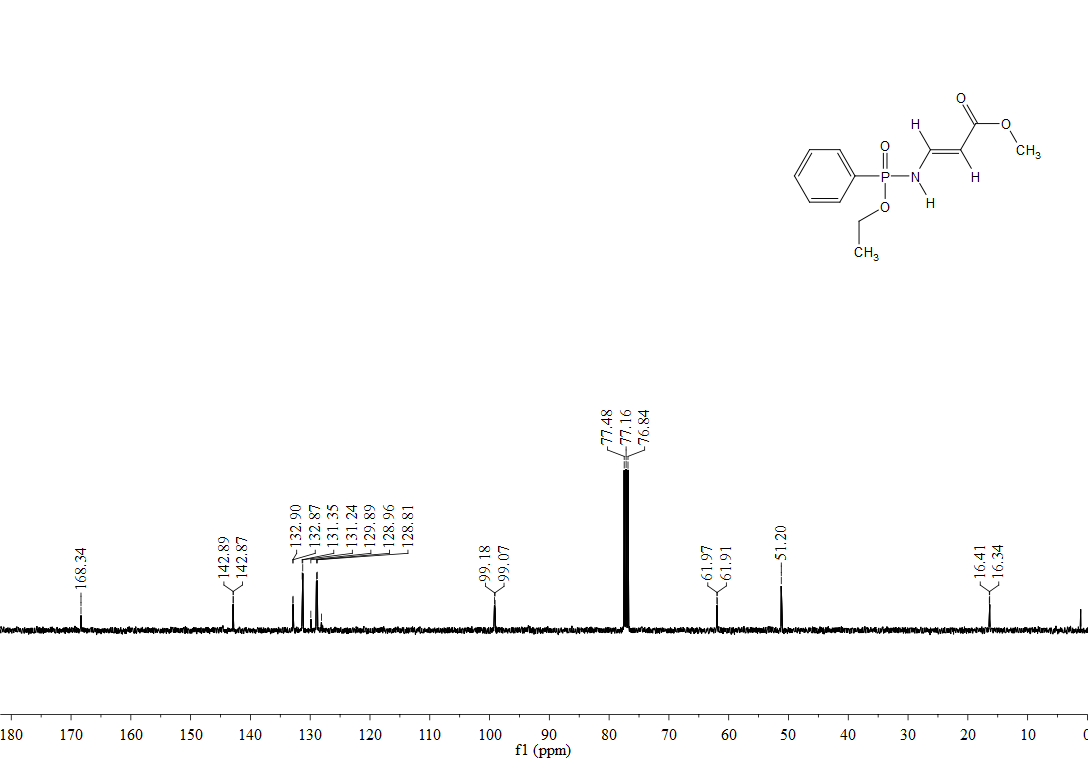
**

**
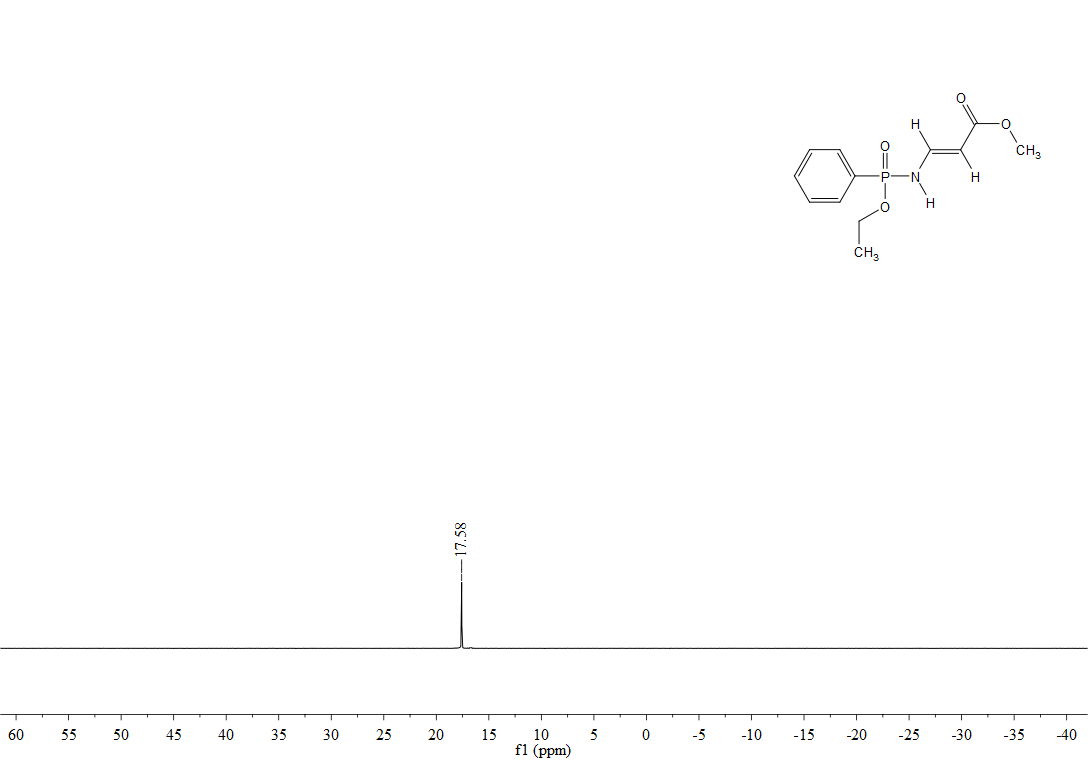
**

**1H, 13C and 31P -NMR spectra of 5aa’**

**
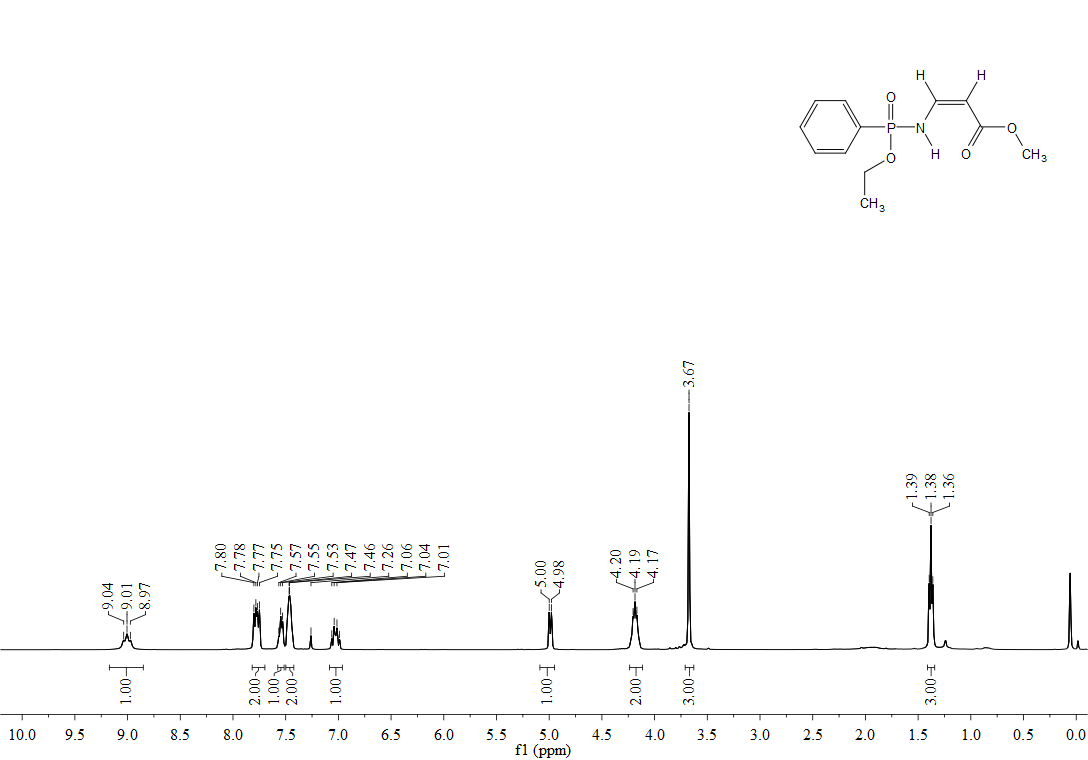
**

**
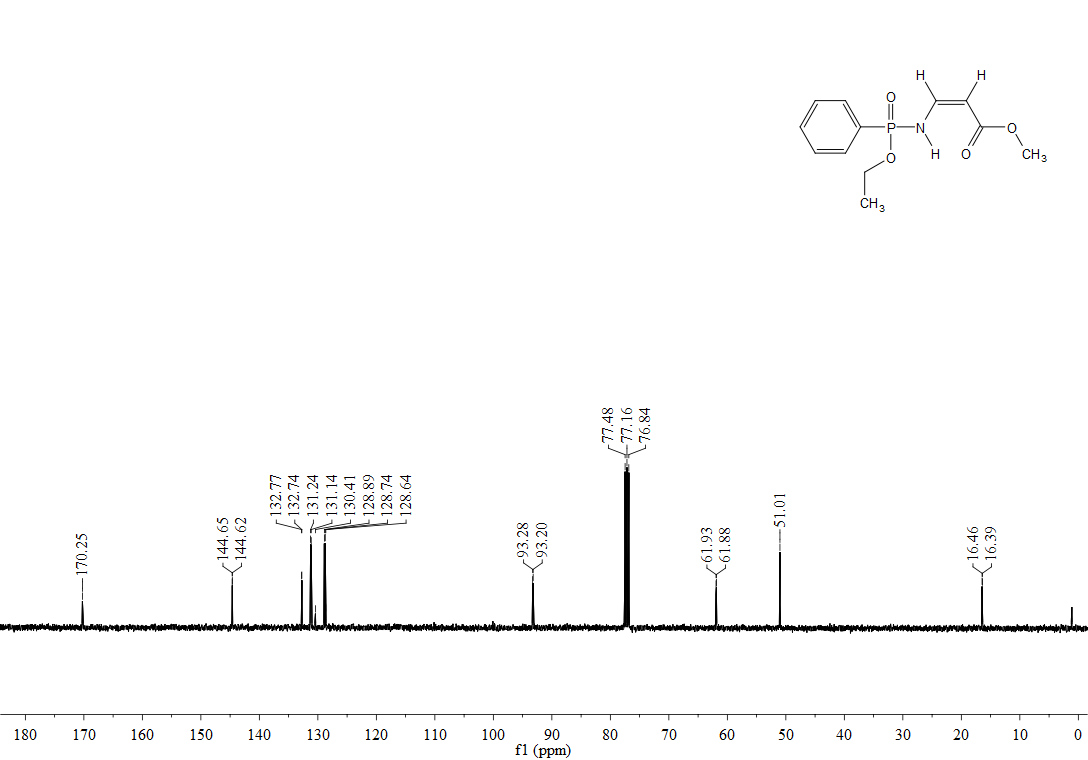
**

**
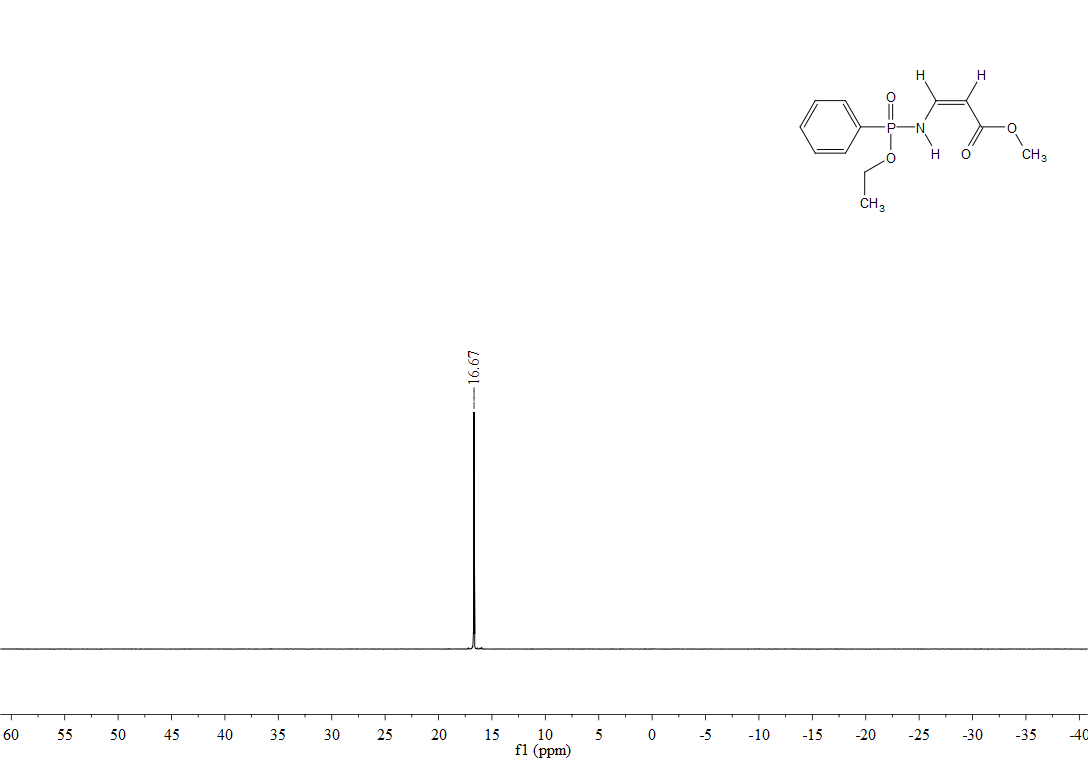
**

**1H, 13C and 31P -NMR spectra of 5ba**

**
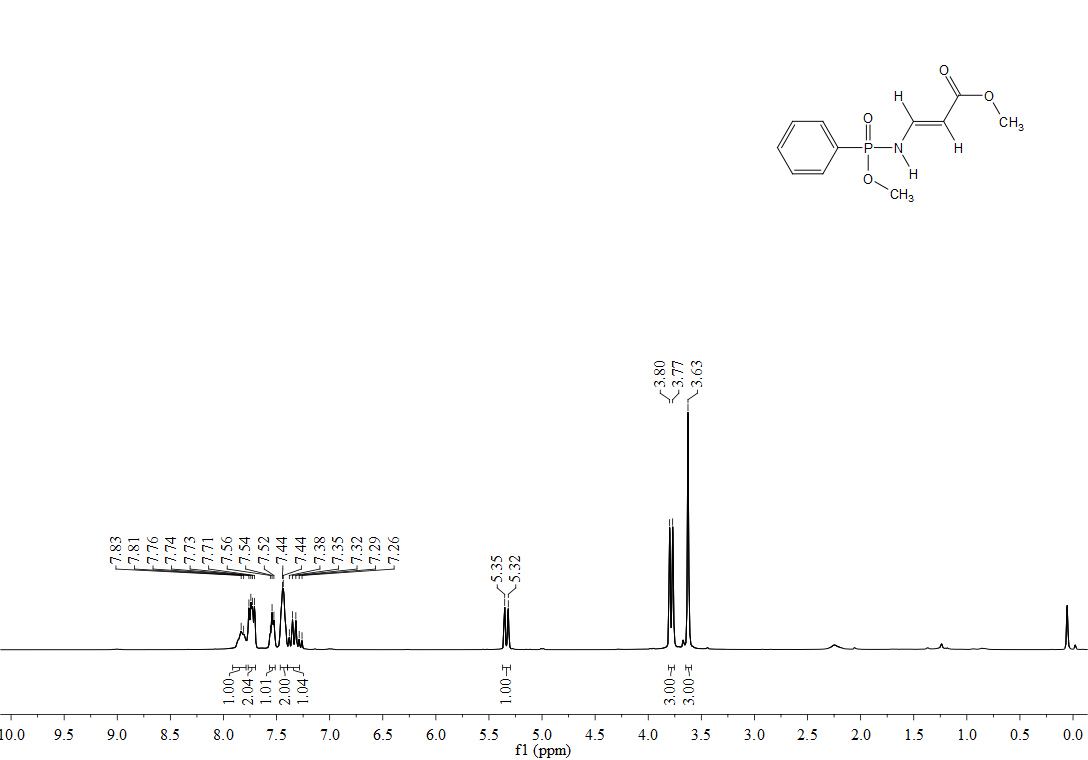
**

**
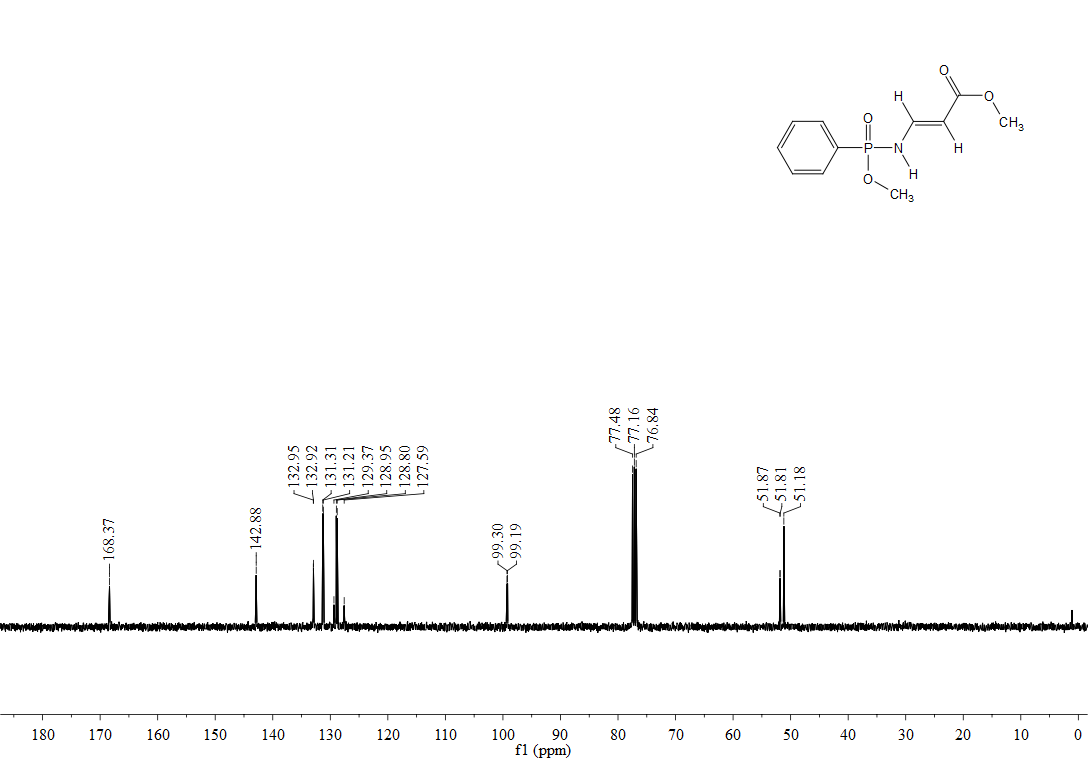
**

**
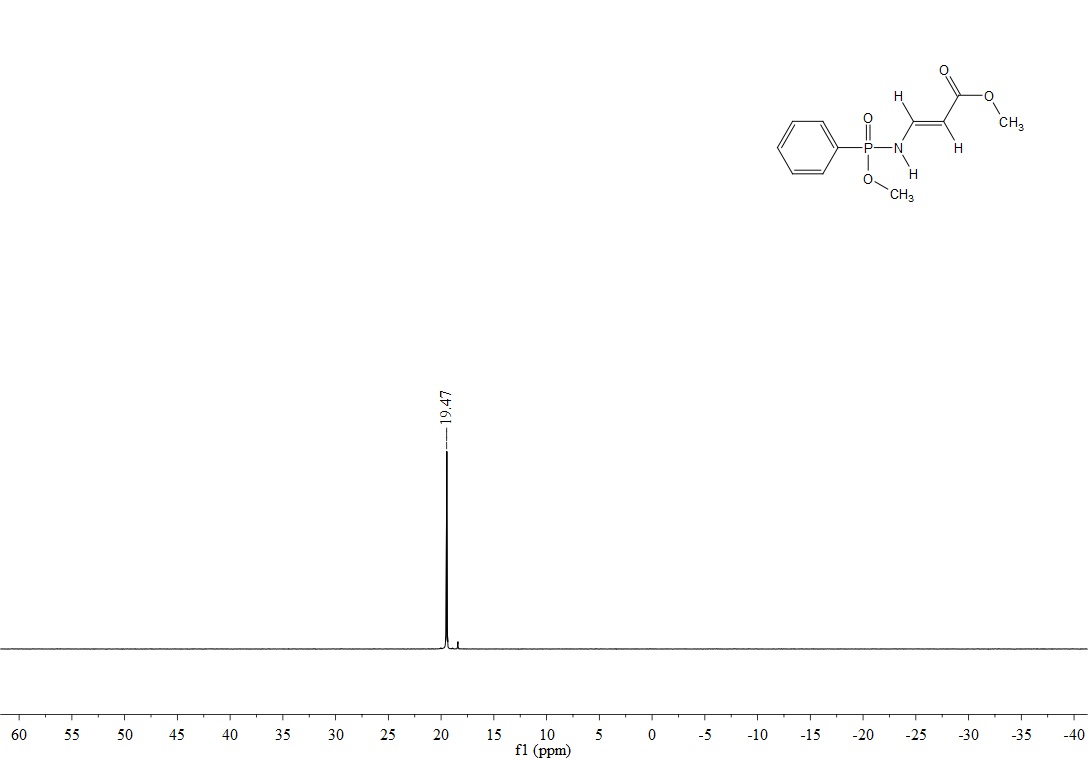
**

**1H, 13C and 31P -NMR spectra of 5ba’**

**
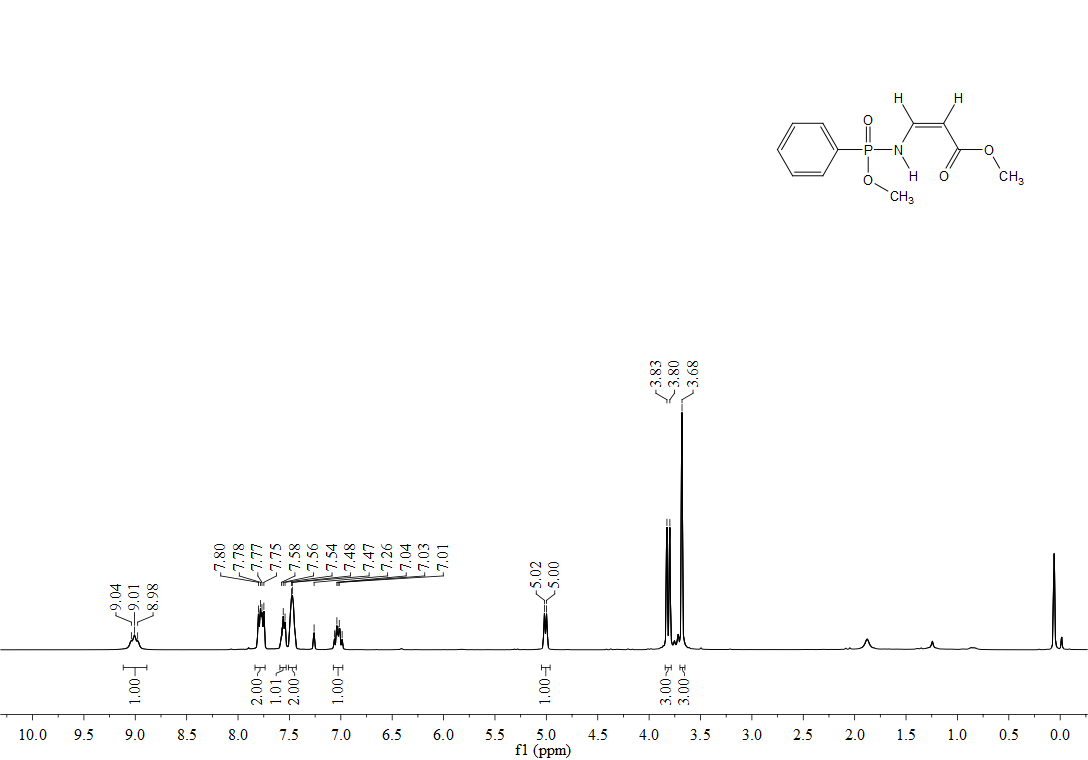
**

**
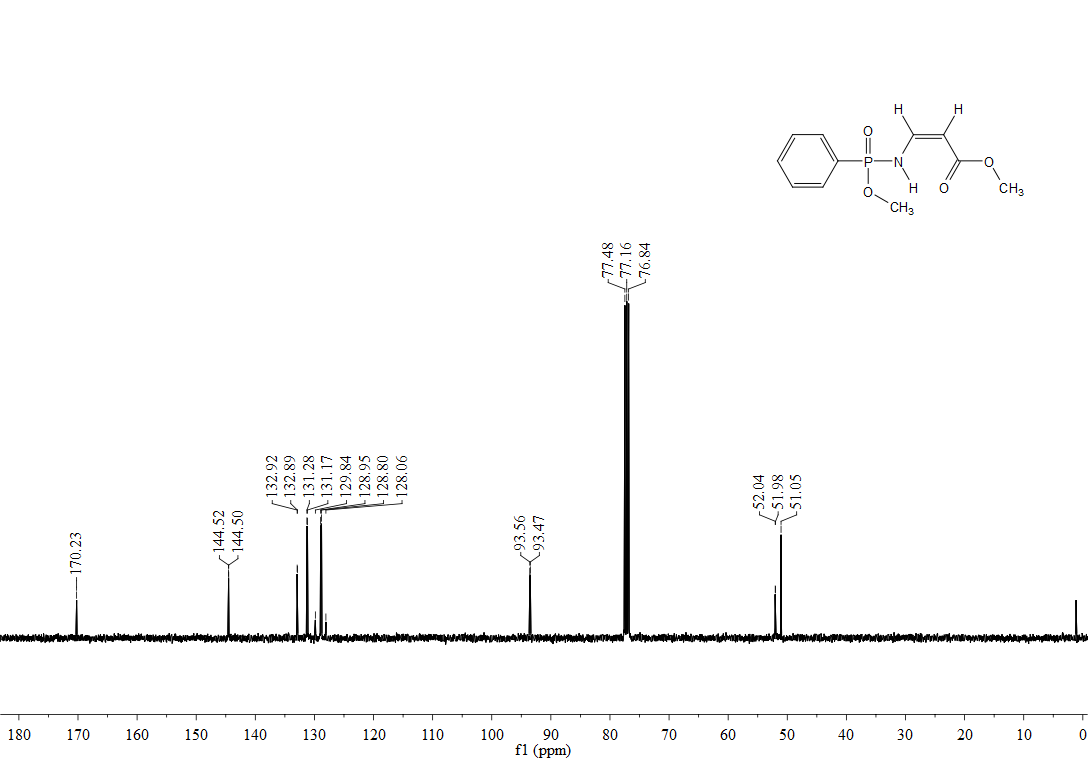
**

**
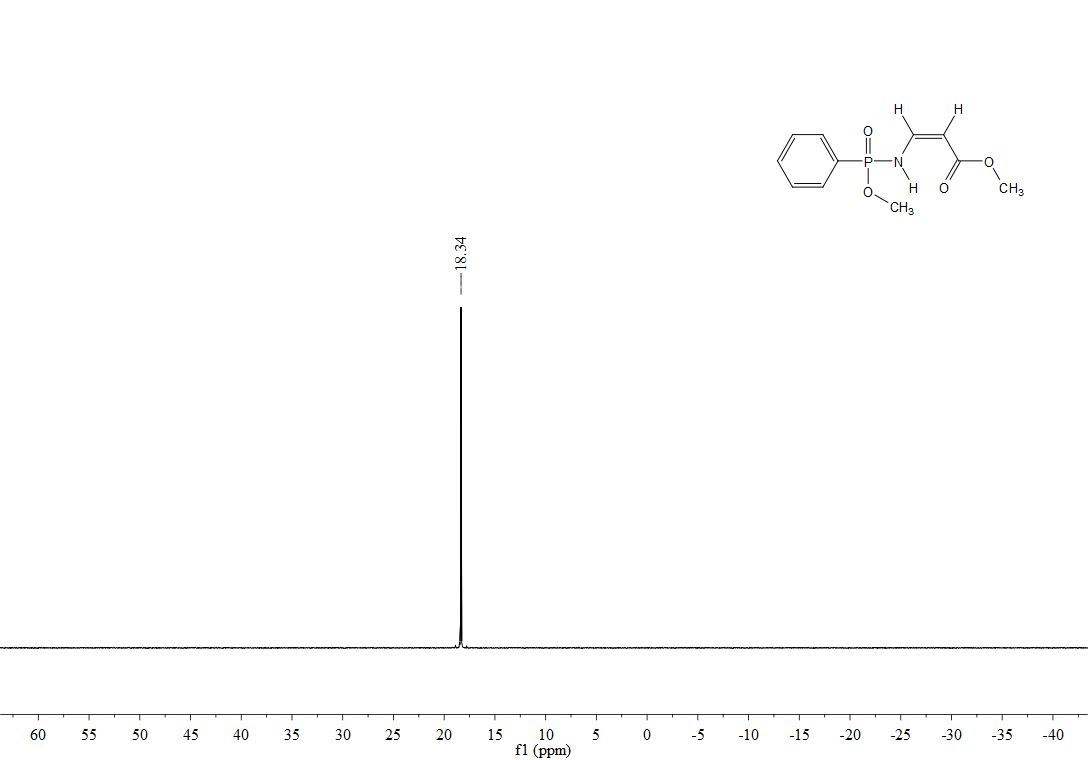
**

**1H, 13C and 31P -NMR spectra of 5ca**

**
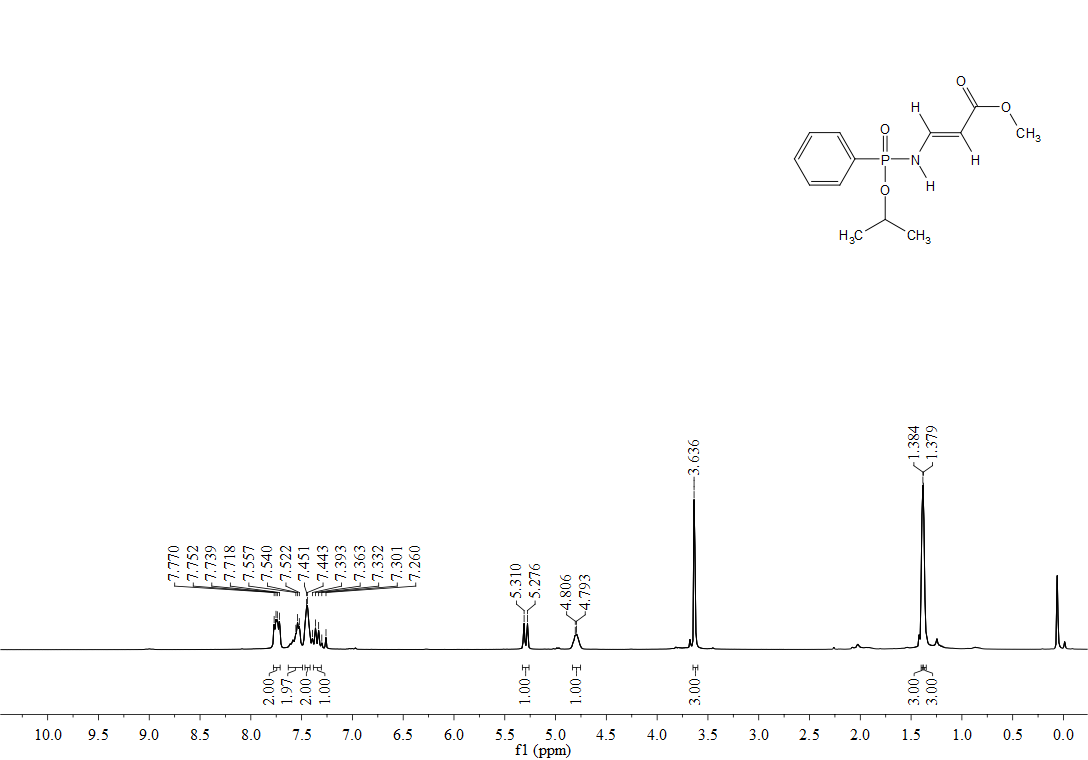
**

**
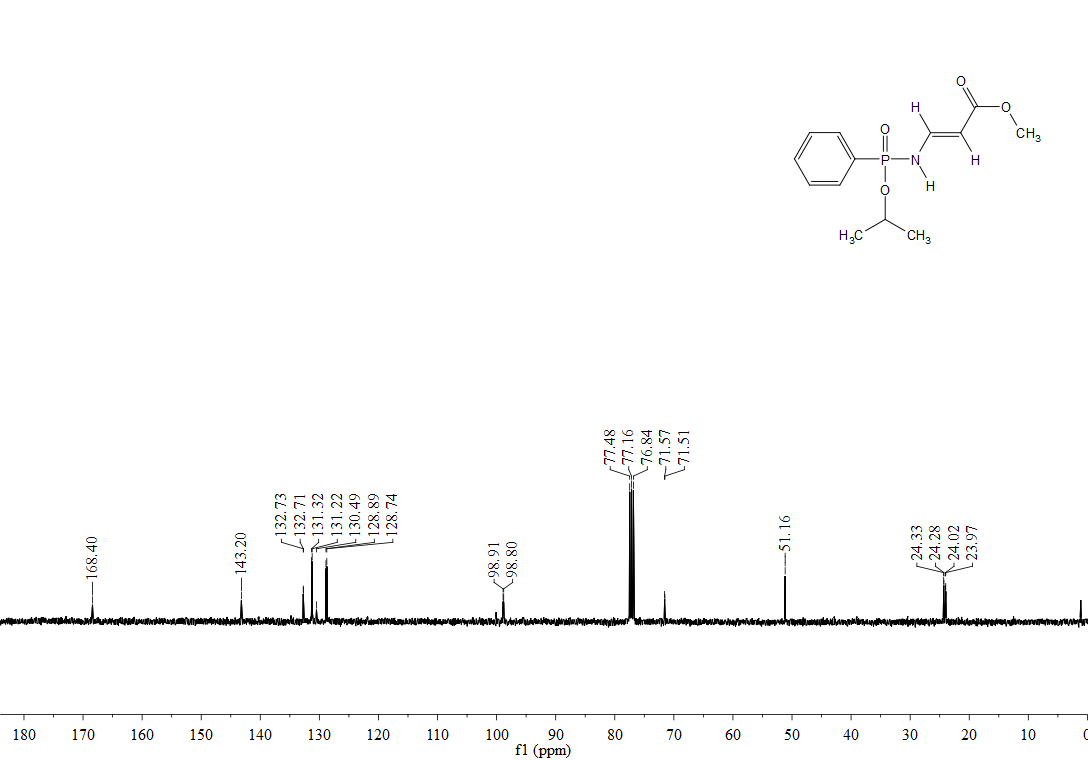
**

**
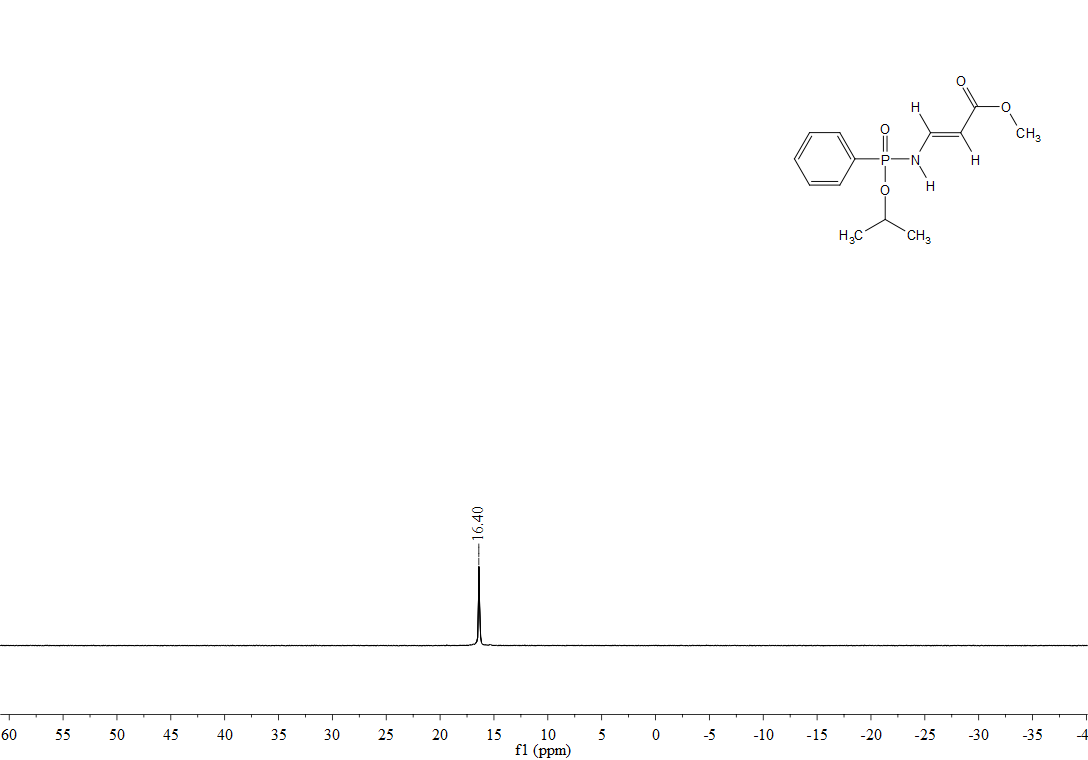
**

**1H, 13C and 31P -NMR spectra of 5ca’**

**
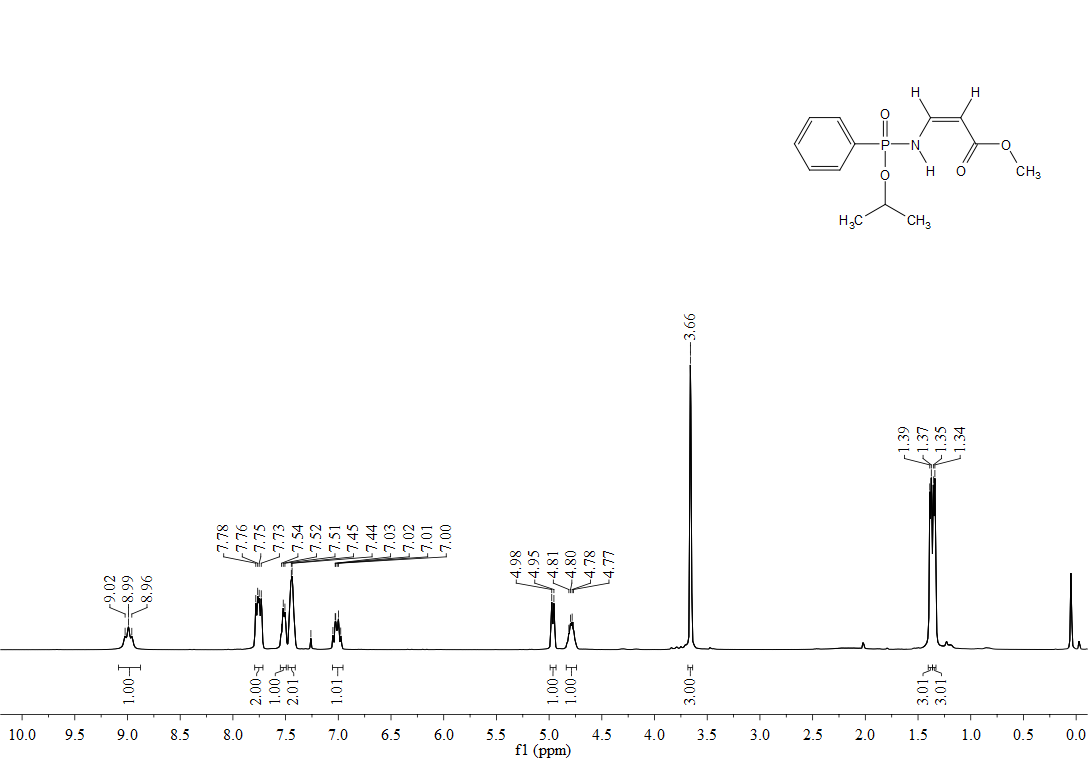
**

**
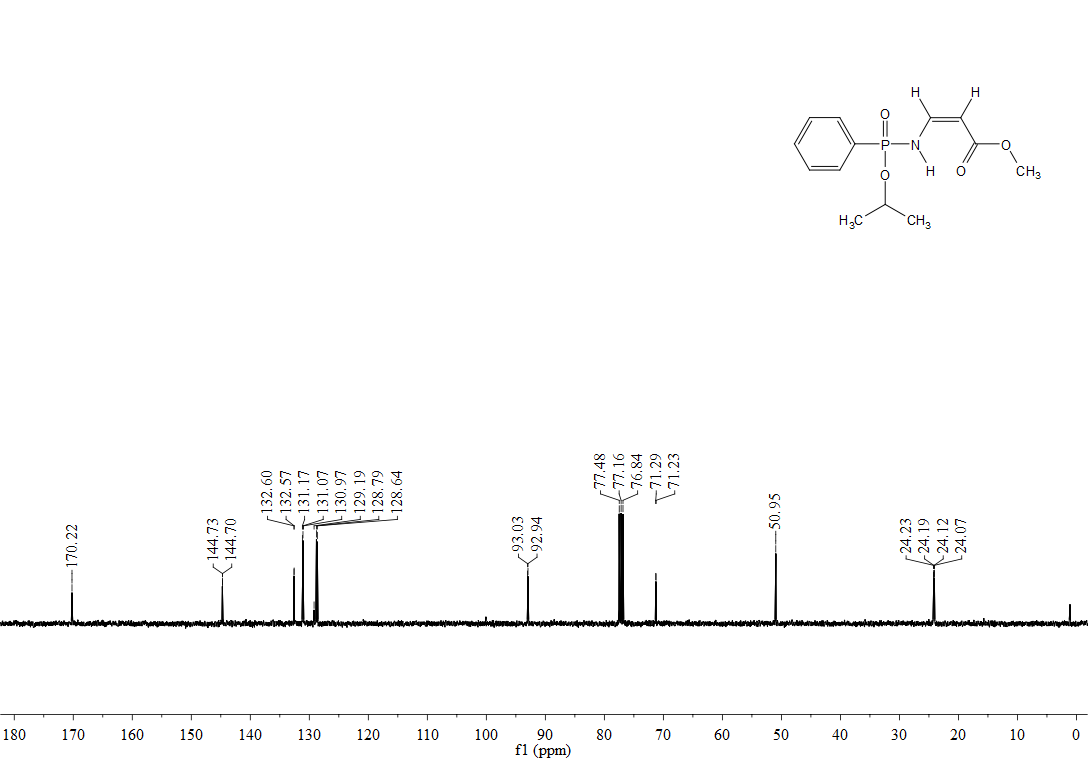
**

**
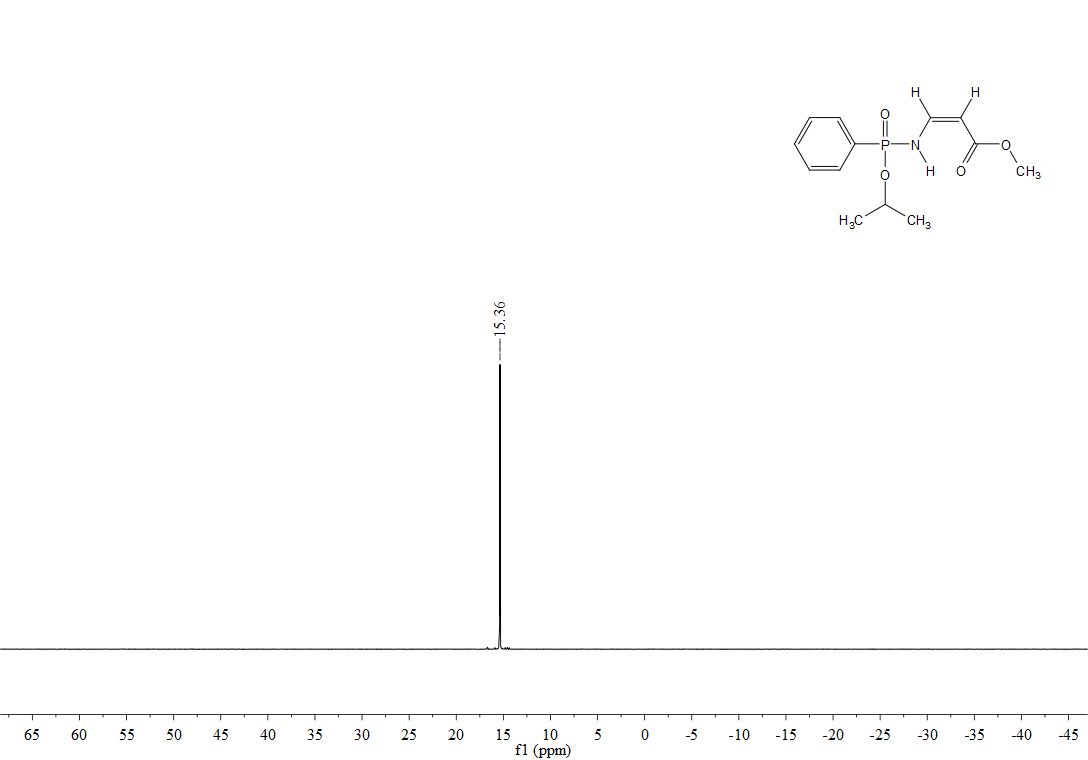
**

**1H, 13C and 31P -NMR spectra of 5da**

**
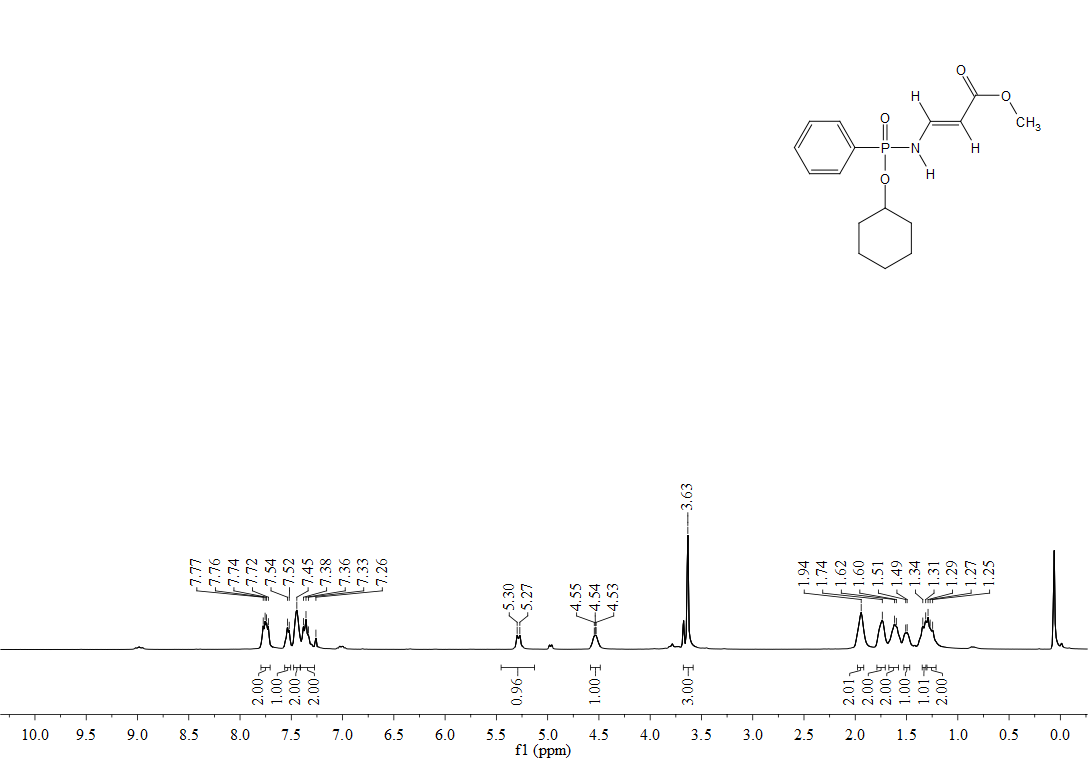
**

**
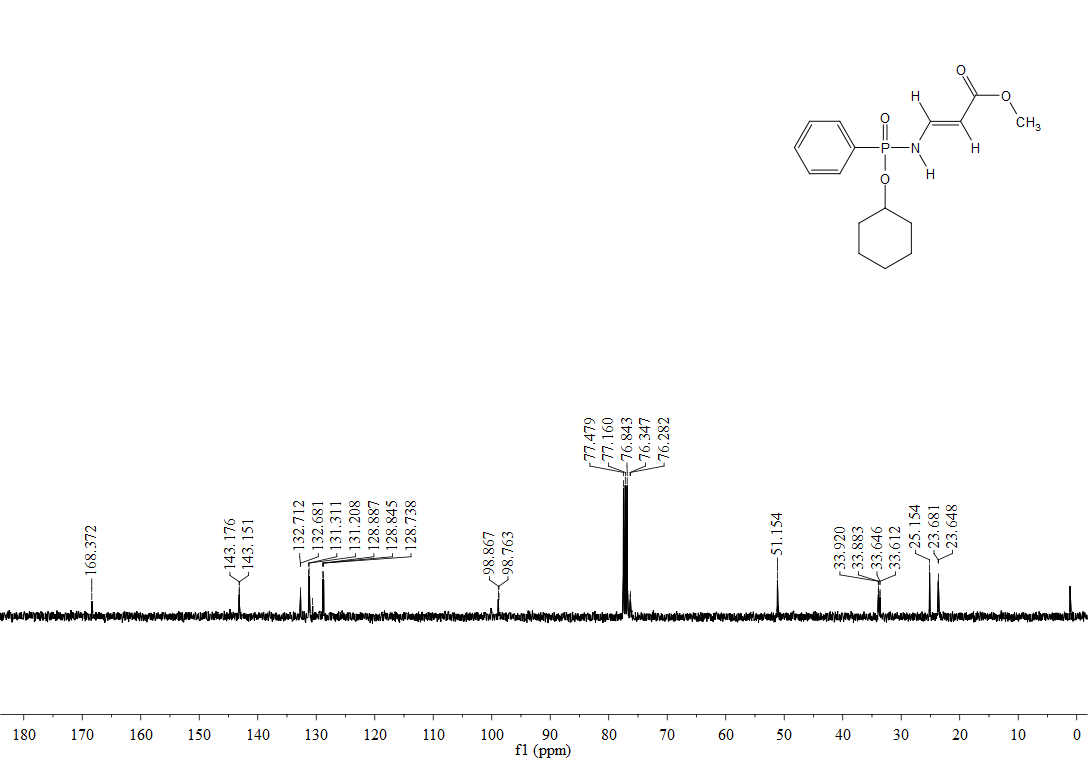
**

**
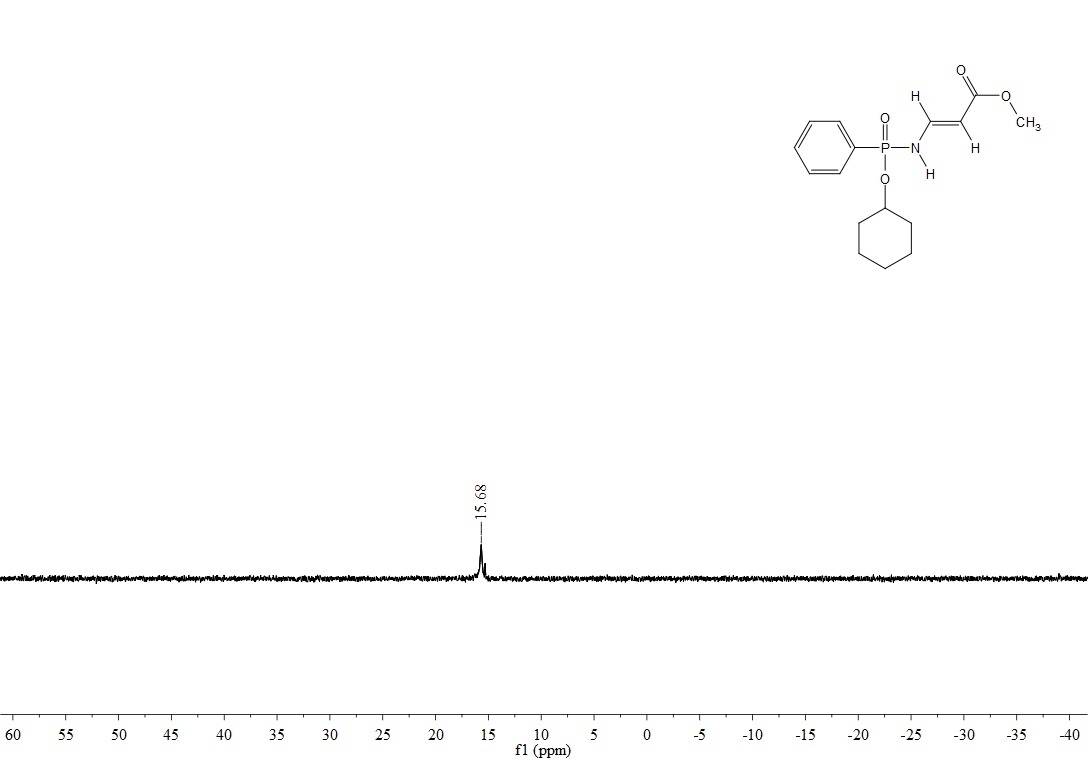
**

**1H, 13C and 31P -NMR spectra of 5da’**

**
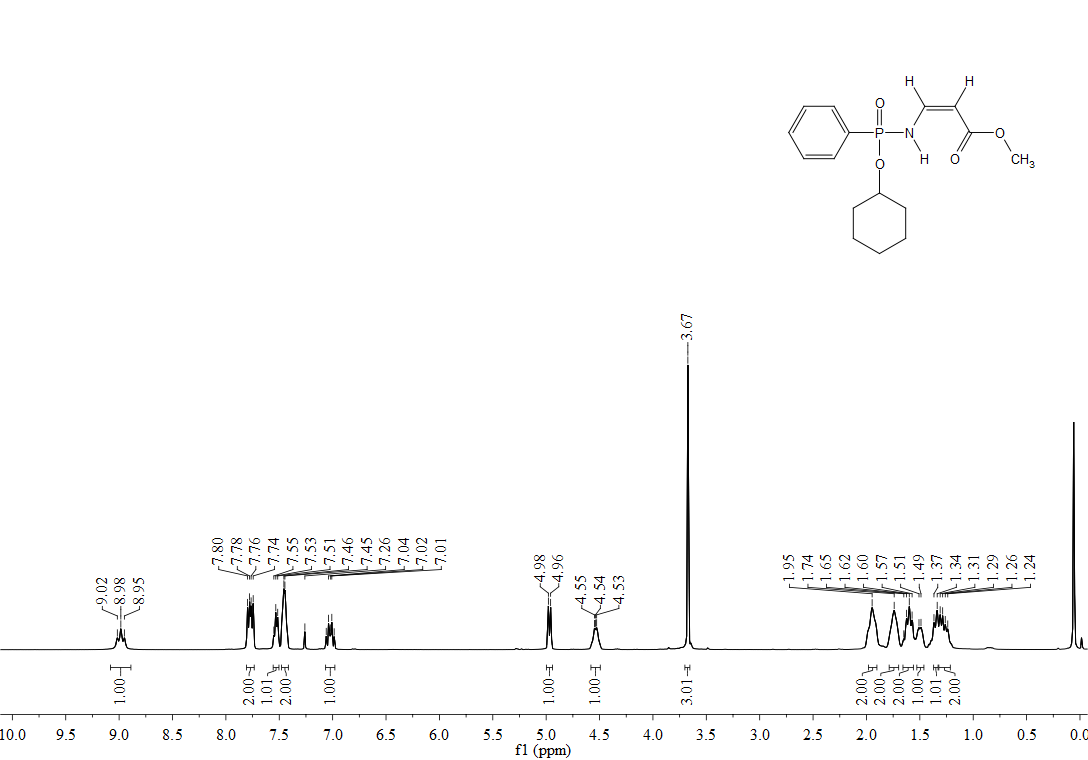
**

**
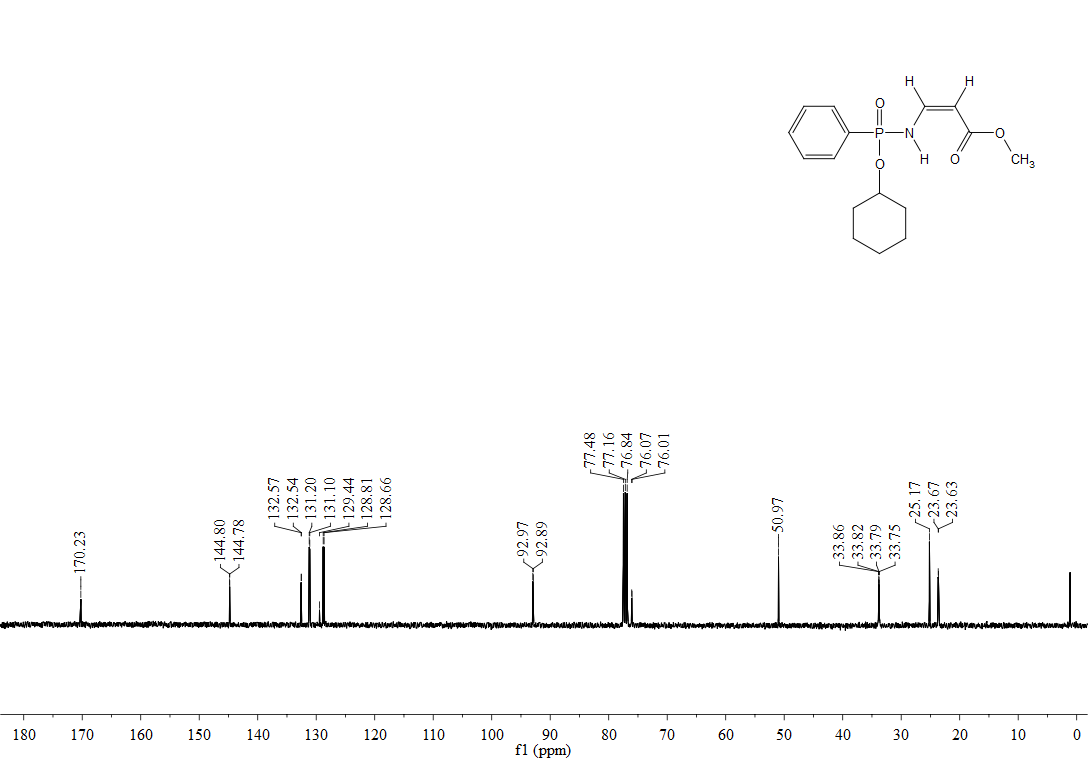
**

**
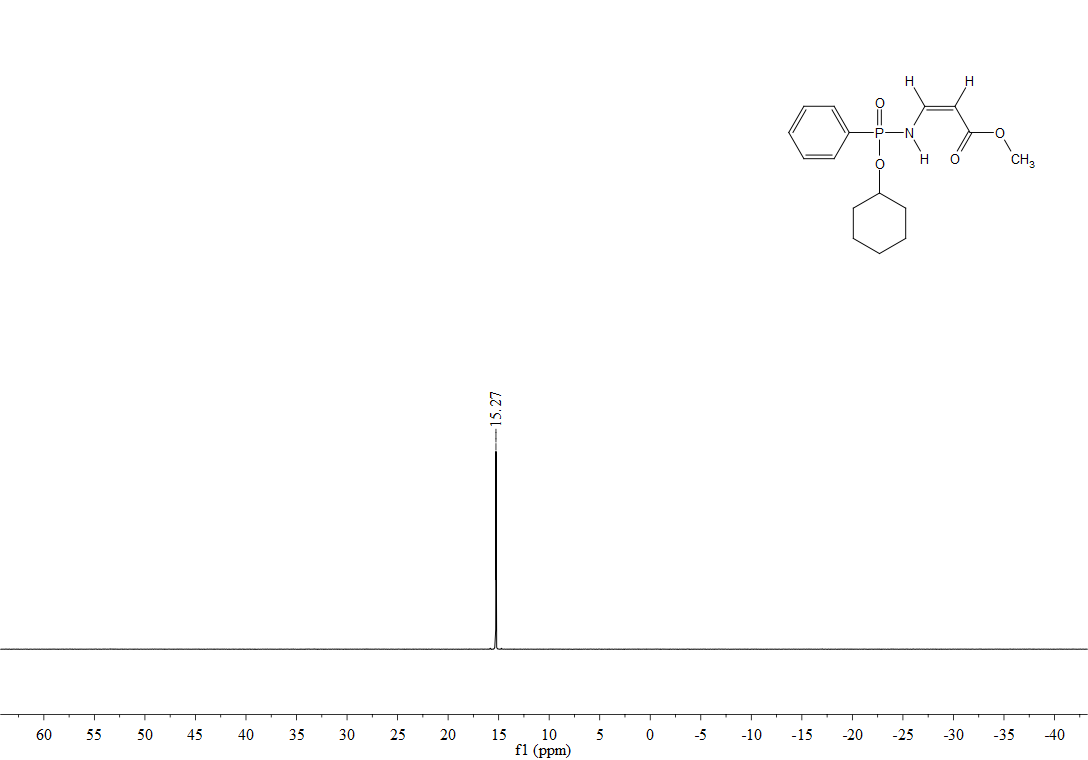
**

**1H, 13C and 31P -NMR spectra of 5ea**

**
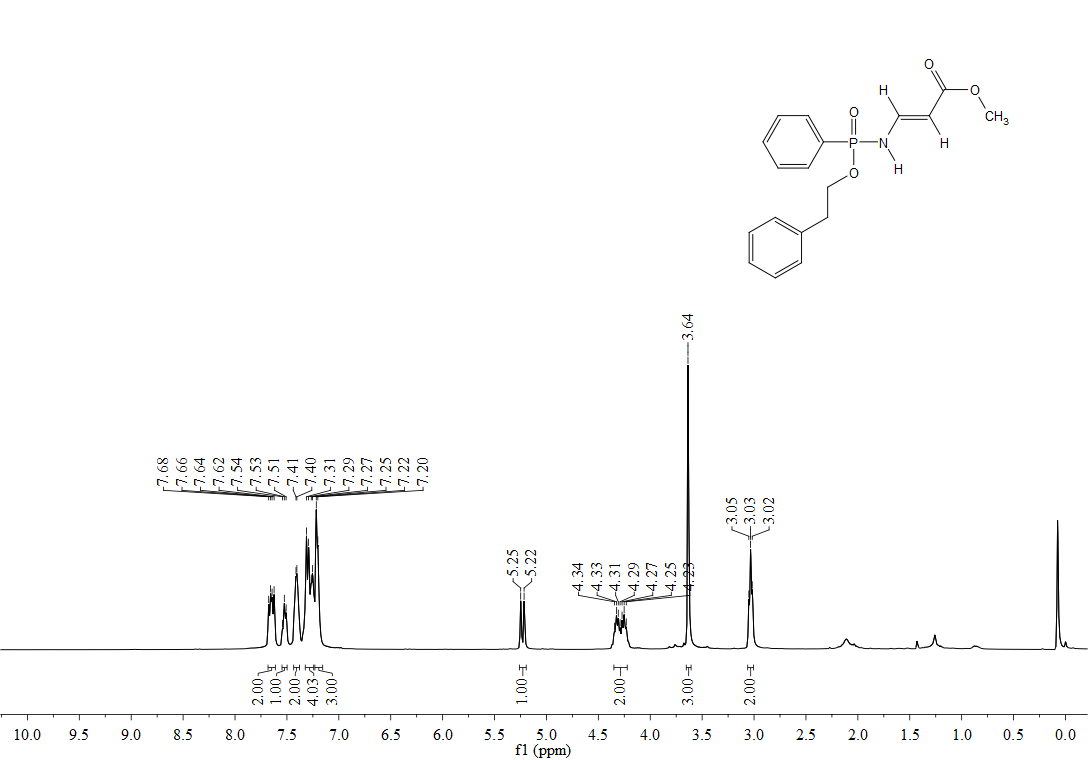
**

**
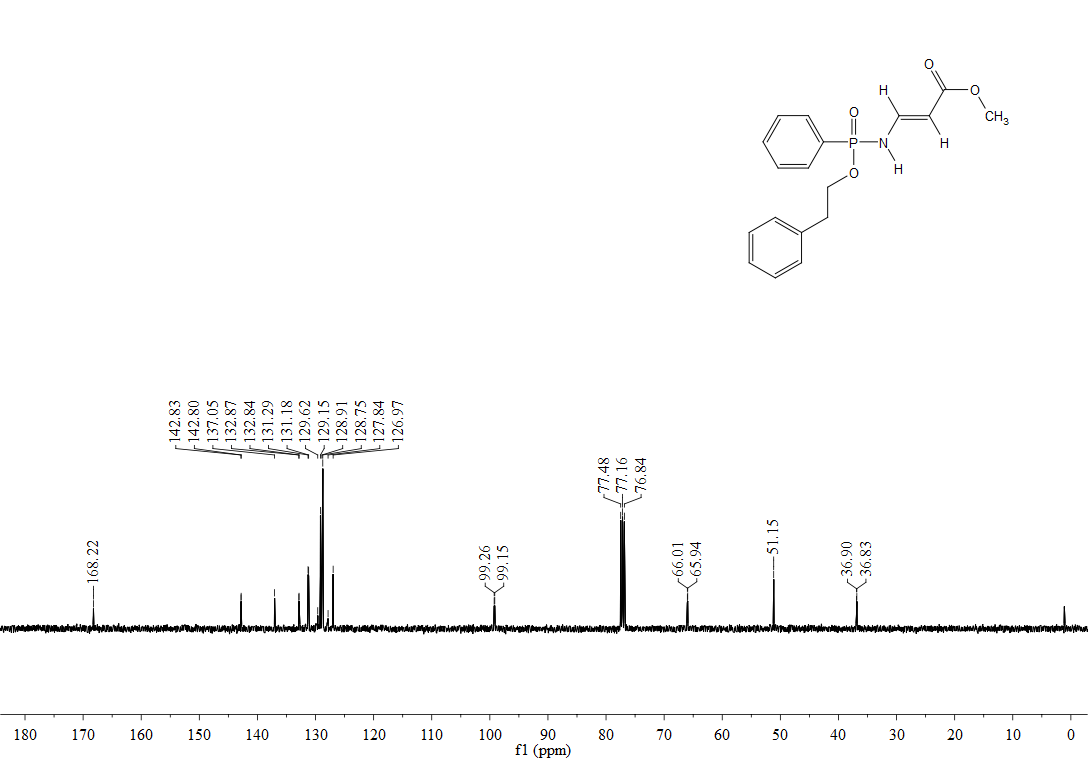
**

**
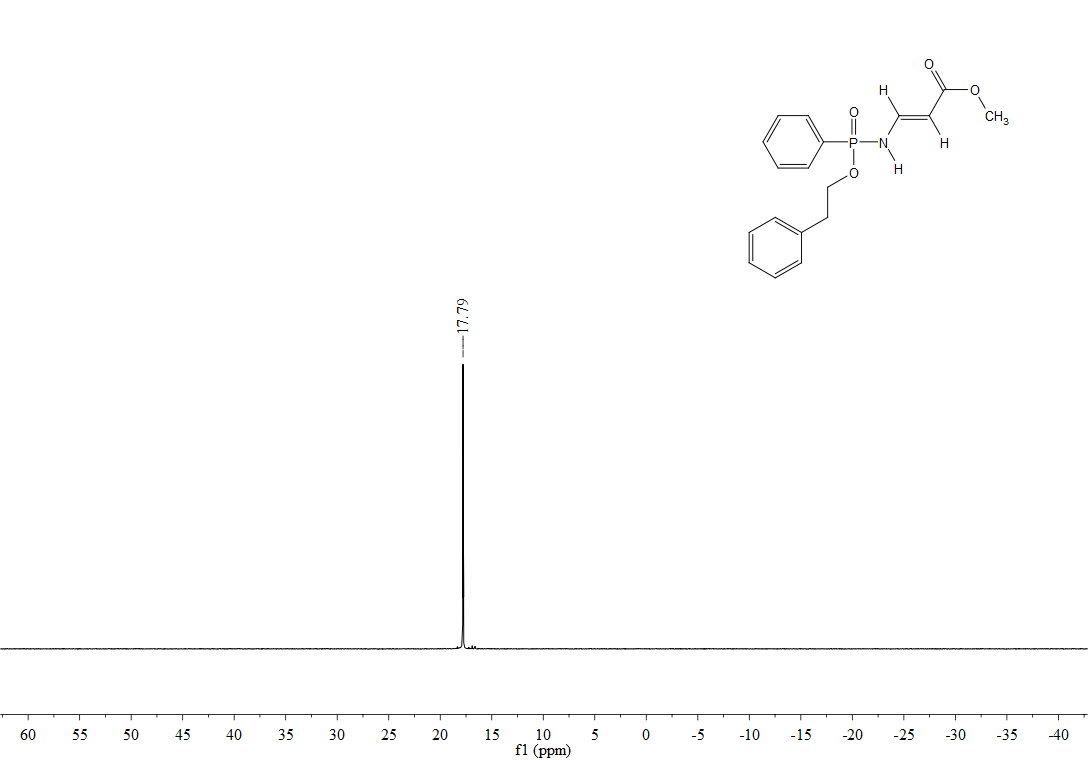
**

**1H, 13C and 31P -NMR spectra of 5ea’**

**
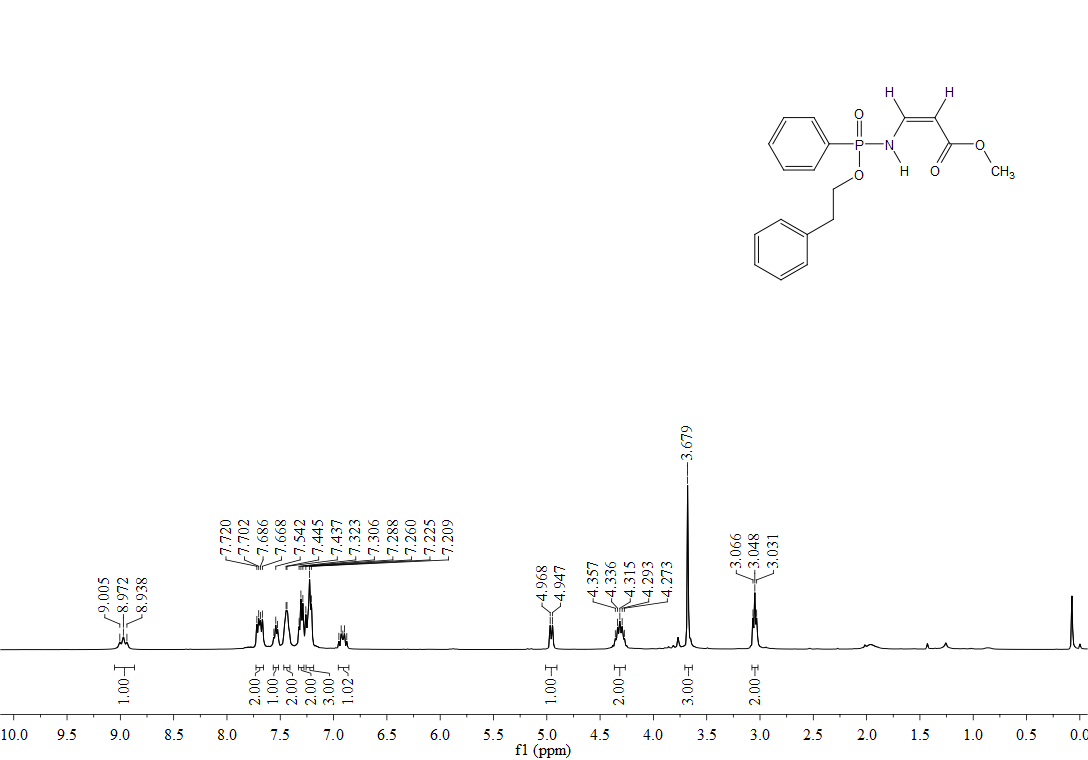
**

**
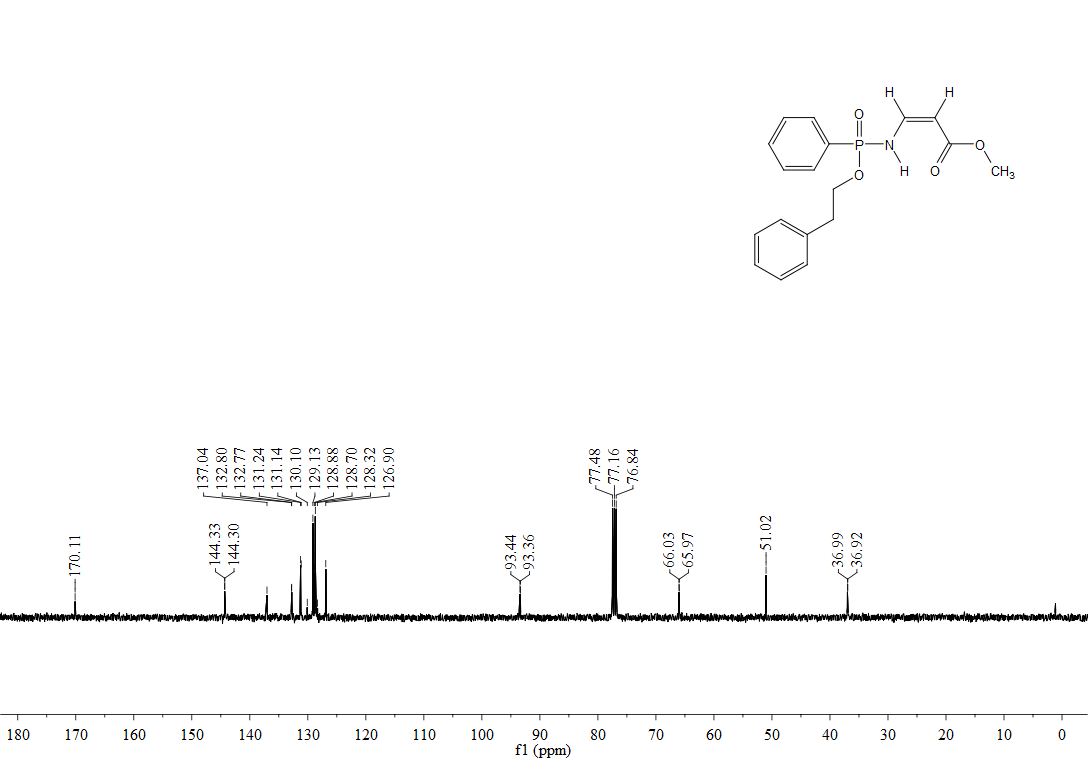
**

**
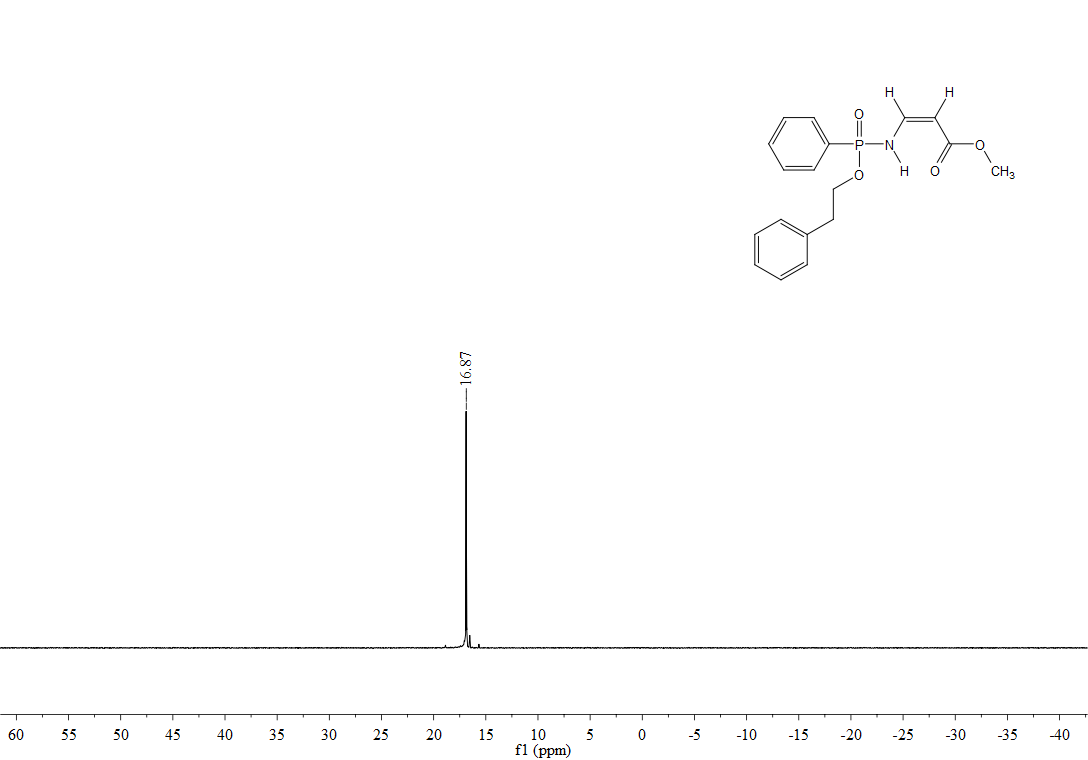
**

**1H, 13C and 31P -NMR spectra of 5fa**

**
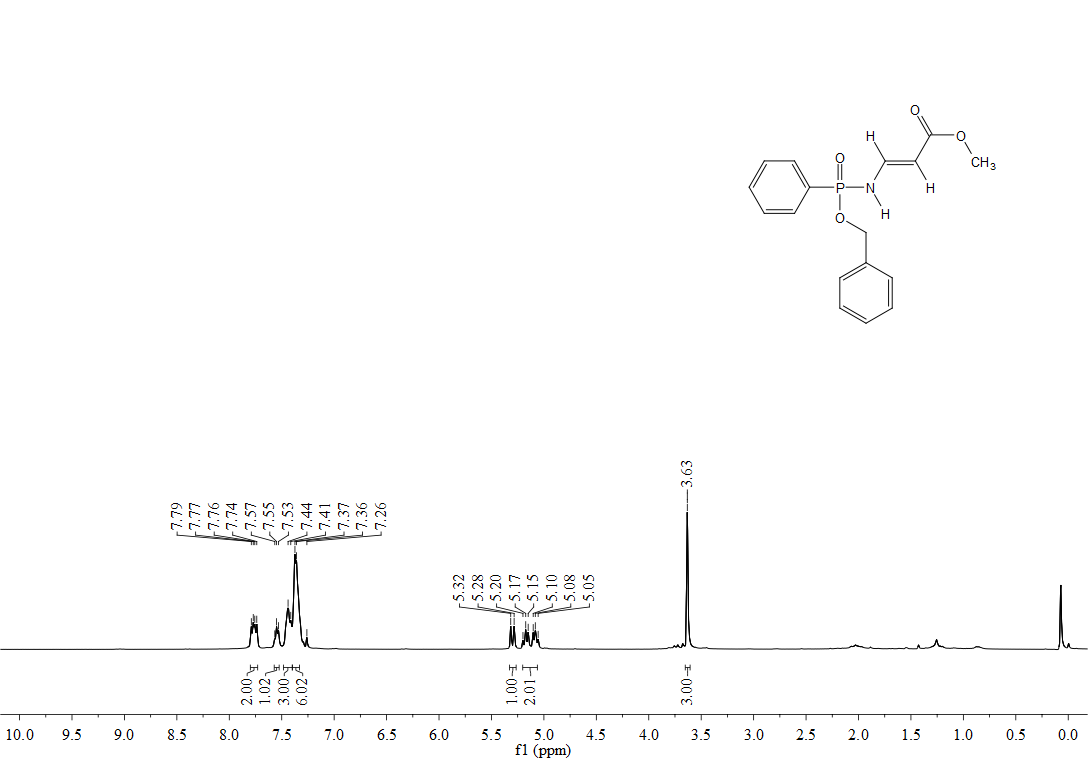
**

**
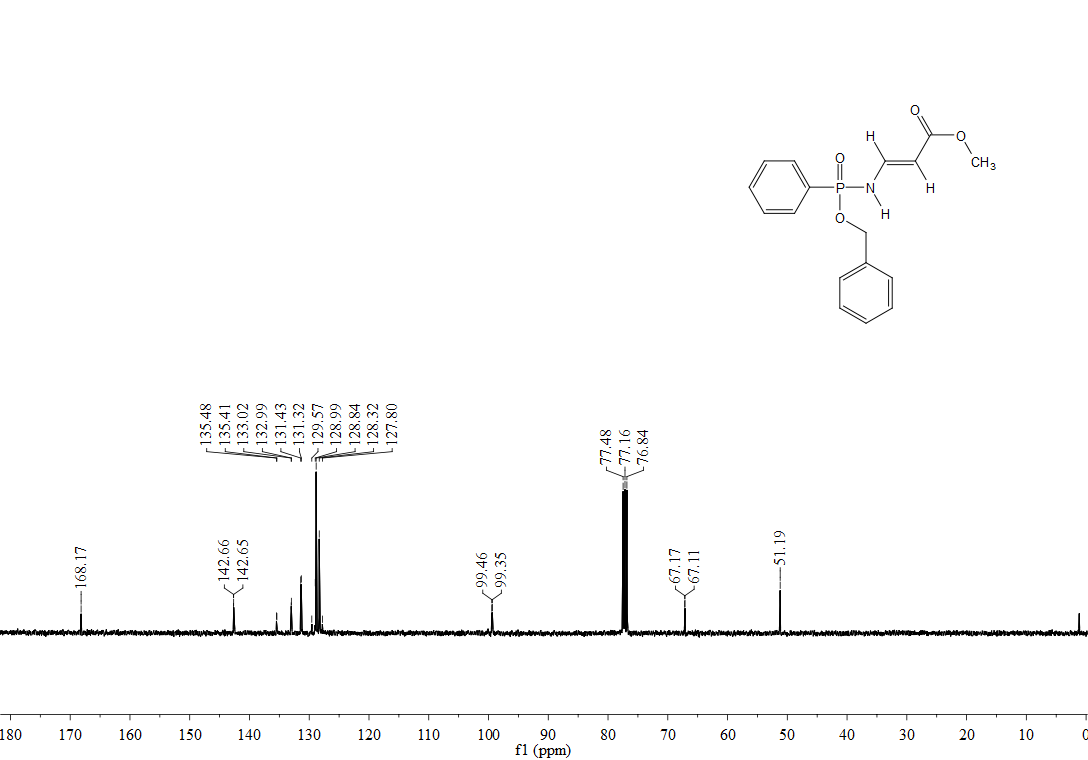
**

**
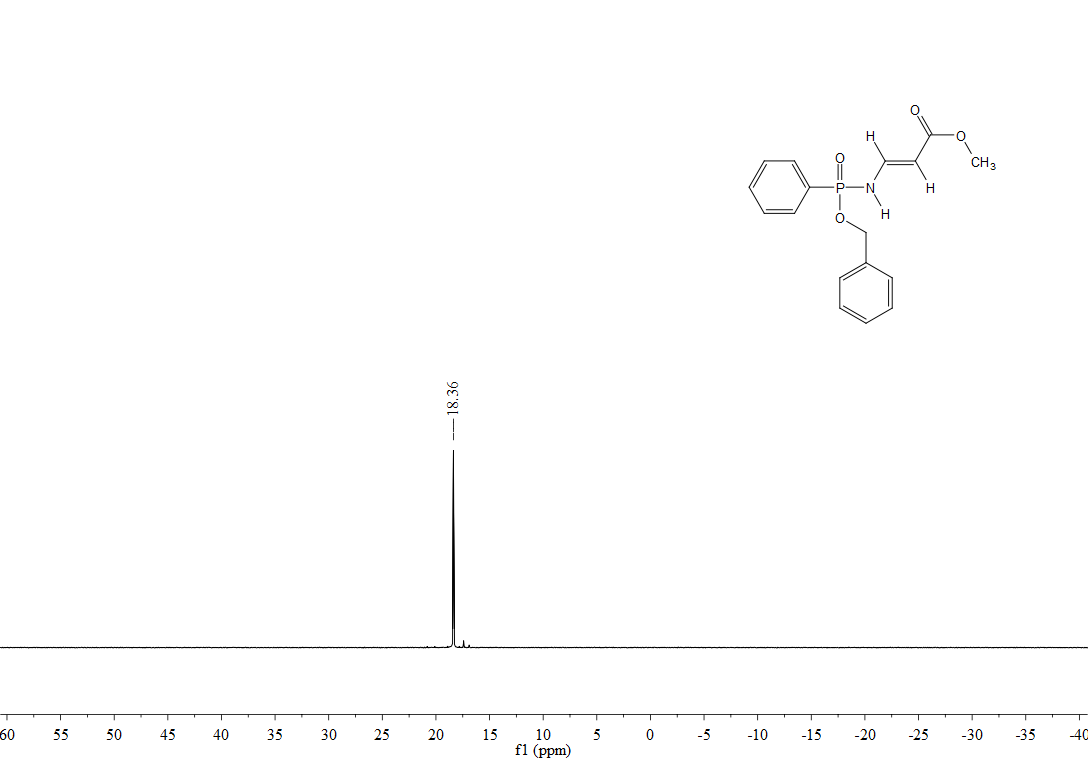
**

**1H, 13C and 31P -NMR spectra of 5fa’**

**
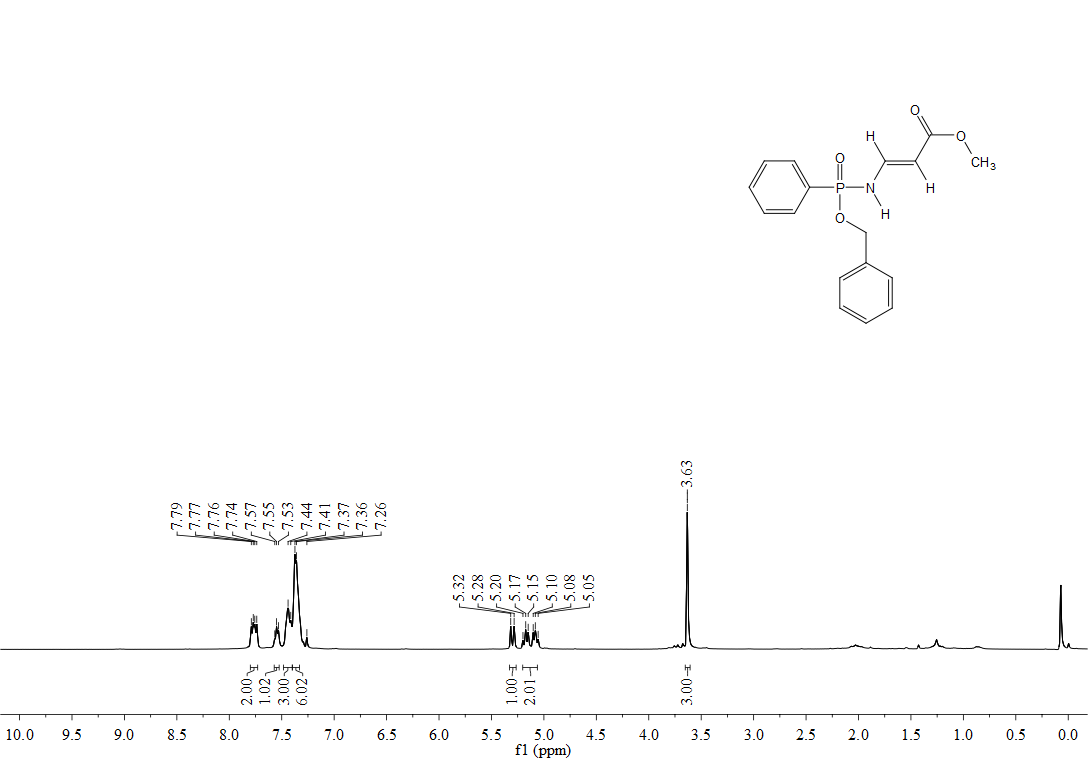
**

**
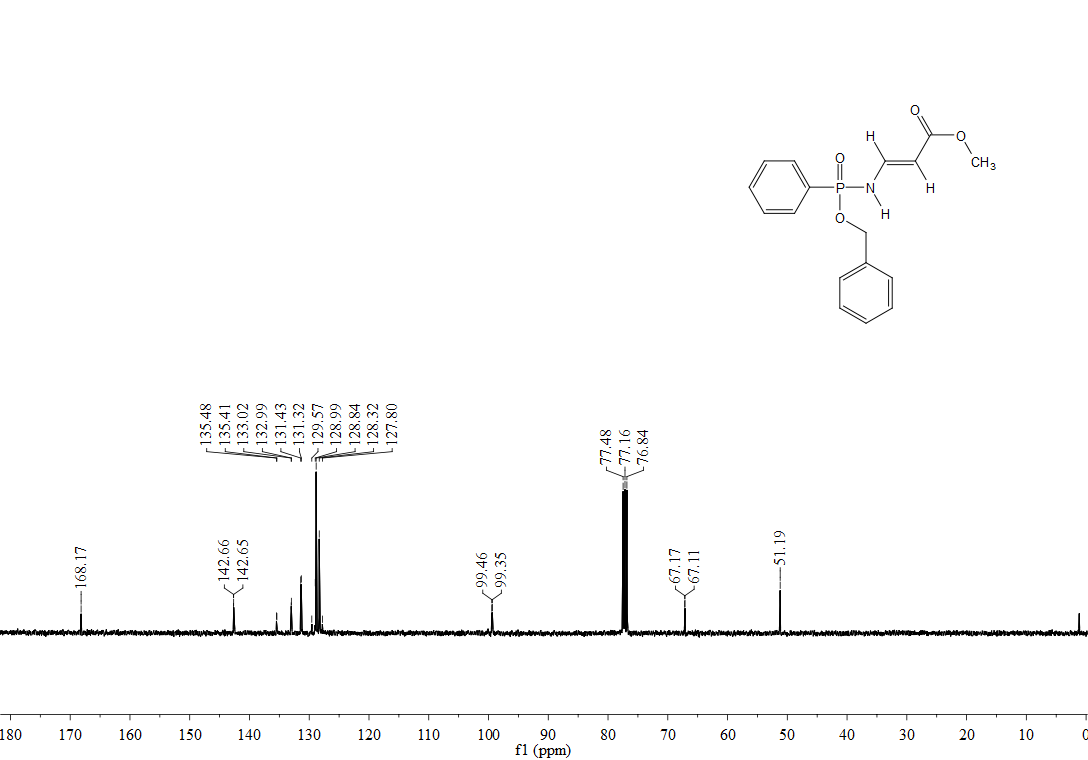
**

**
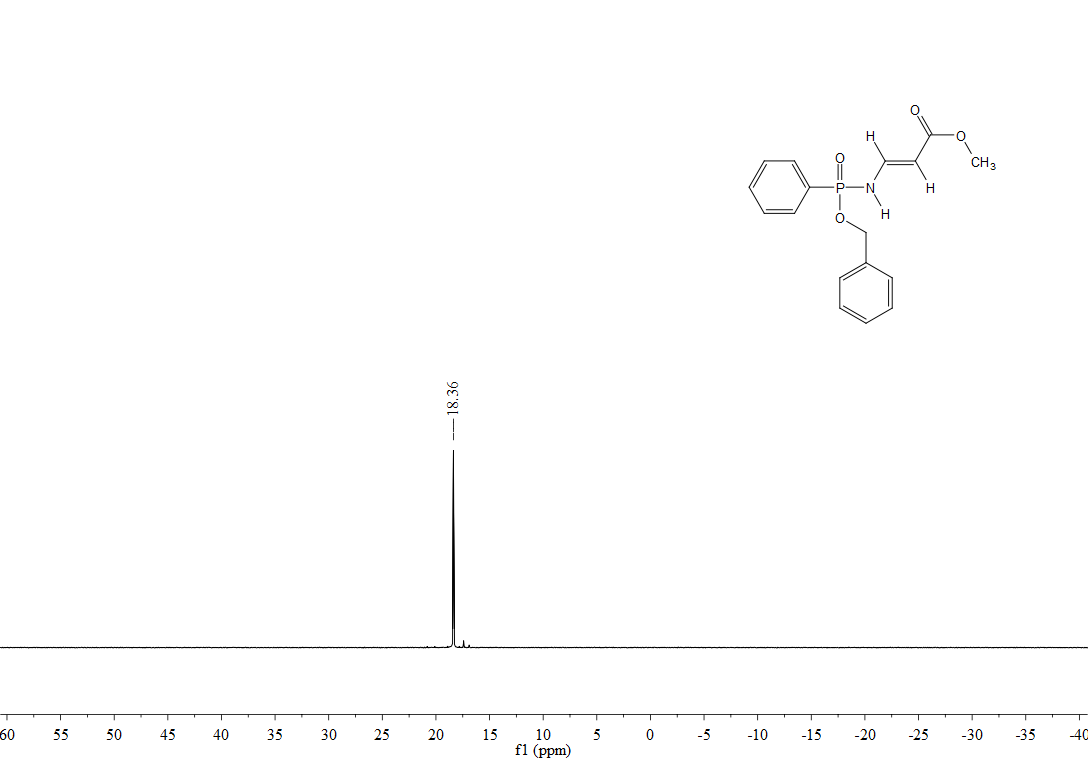
**

**1H, 13C, 19F and 31P -NMR spectra of 5ga**

**
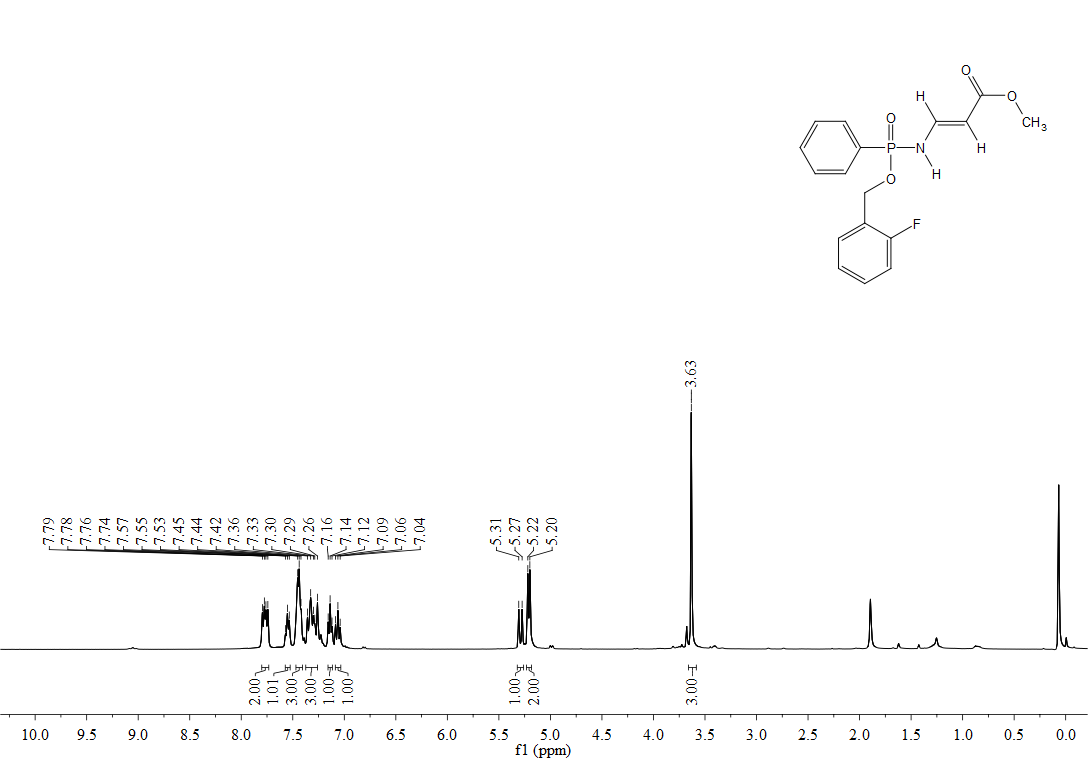
**

**1H, 13C , 19F and 31P -NMR spectra of 5ga’**

**1H, 13C and 31P -NMR spectra of 5ha**

**1H, 13C and 31P -NMR spectra of 5ha’**

**1H, 13C and 31P -NMR spectra of 5ia**

**1H, 13C and 31P -NMR spectra of 5ia’**

**1H, 13C and 31P -NMR spectra of 5ja**

**1H, 13C and 31P -NMR spectra of 5ja’**

**1H, 13C and 31P -NMR spectra of 5la**

**1H, 13C and 31P -NMR spectra of 5la’**

**1H, 13C and 31P -NMR spectra of 5ma**

**1H, 13C and 31P -NMR spectra of 5ma’**

**1H, 13C and 31P -NMR spectra of 5na**

**1H, 13C and 31P -NMR spectra of 5na’**

**1H, 13C and 31P -NMR spectra of 5oa**

**1H, 13C and 31P -NMR spectra of 5oa’**

**1H, 13C and 31P -NMR spectra of 5pa**

**1H, 13C and 31P -NMR spectra of 5pa’**

**1H, 13C and 31P -NMR spectra of 5qa**

**1H, 13C and 31P -NMR spectra of 5qa’**

**1H, 13C and 31P -NMR spectra of 5ab**

**1H, 13C and 31P -NMR spectra of 5ab’**

**1H, 13C and 31P -NMR spectra of 5ac**

**1H, 13C and 31P -NMR spectra of 5ac’**

**1H, 13C and 31P -NMR spectra of 5ad**

**1H, 13C and 31P -NMR spectra of 5ad’**

**1H, 13C and 31P -NMR spectra of 5ae**

**1H, 13C and 31P -NMR spectra of 5ae’**

**1H, 13C and 31P -NMR spectra of 5af**

**1H, 13C and 31P -NMR spectra of 5af’**

**1H, 13C and 31P -NMR spectra of 5ag**

**1H, 13C and 31P -NMR spectra of 5ag’**

**1H, 13C and 31P -NMR spectra of 5ah**

**1H, 13C and 31P -NMR spectra of 5ah’**
